# Supplementary material
Source: publisher figshare collection journal article supplement (https://gsapubs.figshare.com/ndownloader/files/23306405)
Supplement: Supplementary file 1 [file 23306405]

## Sheet: DZ
Supplementary Table 4 - U-Pb geochronology of detrital zircons from the Kobuk Koyukuk Basin.
BRJR13-K8a_Type 1
					Isotopic Ratios							Apparent Ages
Analysis	U	207Pb*	±	207Pb*	±	206Pb*	±	error		206Pb*	±	207Pb*	±	206Pb*	±	Best	±
	(ppm)	206Pb*	(%)	235U	(%)	238U	(%)	corr.		238U	Ma	235U	Ma	207Pb*	Ma	Age†	Ma††
BRJR13-K8a_9	614.061	0.0487	1.84805	0.1066	3.61163	0.01589	3.4613	0.20044		101.6	3.45	102.9	3.55	240	50.8	101.6	3.45
BRJR13-K8a_3	377.622	0.0482	3.21577	0.1117	4.47628	0.01686	3.55872	0.097101		107.8	3.75	107.3	4.55	294	53.9	107.8	3.75
BRJR13-K8a_8	580.041	0.049	1.73469	0.1146	3.57766	0.01702	3.52526	0.14321		108.78	3.7	110	3.75	232	54.39	108.78	3.7
BRJR13-K8a_88	58.8546	0.0496	3.125	0.1756	4.27107	0.0258	3.48837	0.055141		164.2	5.5	163.9	6.5	559	82.1	164.2	5.5
BRJR13-K8a_92	72.9729	0.0503	2.8827	0.1795	4.17827	0.02609	3.4496	0.13557		166	5.5	166.7	6.5	487	83	166	5.5
BRJR13-K8a_87	48.9888	0.0525	3.42857	0.186	4.56989	0.02629	3.61354	0.088348		167.3	6	171.9	7	594	83.65	167.3	6
BRJR13-K8a_59	301.077	0.0504	2.08333	0.1838	3.80849	0.02672	3.36826	0.19546		170.2	6	170.9	6	346	85.1	170.2	6
BRJR13-K8a_60	581.742	0.0489	1.84049	0.1774	3.66404	0.0268	3.35821	0.42404		170.5	6	166.3	5.5	216	85.25	170.5	6
BRJR13-K8a_23	119.92	0.0496	2.31855	0.1882	3.98512	0.02756	3.44702	0.10206		175.2	6	175.2	6	373	87.6	175.2	6
BRJR13-K8a_1	450.765	0.04988	1.70409	0.197	3.5533	0.02901	3.44709	0.2936		184.3	6	182.3	6	265	92.15	184.3	6
BRJR13-K8a_97	343.602	0.0515	1.74757	0.2077	3.61098	0.02922	3.42231	0.26423		185.6	6.5	191.6	6	290	92.8	185.6	6.5
BRJR13-K8a_72	233.037	0.0515	2.3301	0.2034	3.93314	0.02928	3.4153	0.20778		186	6.5	188.3	6.5	327	93	186	6.5
BRJR13-K8a_81	517.104	0.0508	2.55906	0.2075	3.85542	0.02949	3.56053	0.21004		187.3	6.5	191.3	7	278	93.65	187.3	6.5
BRJR13-K8a_98	353.808	0.051	1.76471	0.2111	3.55282	0.02969	3.36814	0.26339		188.6	6.5	194.4	6.5	291	94.3	188.6	6.5
BRJR13-K8a_41	375.921	0.0491	1.73116	0.2013	3.4774	0.02974	3.36247	0.20404		188.9	6.5	185.9	6	237	94.45	188.9	6.5
BRJR13-K8a_46	151.049	0.0517	2.12766	0.2135	3.74707	0.02977	3.35909	0.0025535		189.1	6.5	196.3	6.5	373	94.55	189.1	6.5
BRJR13-K8a_82	51.3702	0.0516	3.10078	0.211	4.2654	0.02981	3.52231	-0.03033		189.3	6.5	194.1	7.5	547	94.65	189.3	6.5
BRJR13-K8a_47	967.869	0.0496	1.6129	0.2039	3.43306	0.02987	3.51523	0.50126		189.8	6.5	188.3	6	205	94.9	189.8	6.5
BRJR13-K8a_76	569.835	0.0489	1.94274	0.2008	3.73506	0.03013	3.4849	0.28007		191.4	6.5	185.5	6.5	225	95.7	191.4	6.5
BRJR13-K8a_37	306.18	0.0499	1.80361	0.2052	3.65497	0.03015	3.48259	0.099375		191.5	6.5	189.7	6	255	95.75	191.5	6.5
BRJR13-K8a_66	200.718	0.0528	2.46212	0.2181	3.89729	0.03016	3.48143	0.17935		191.5	6.5	199.8	7	346	95.75	191.5	6.5
BRJR13-K8a_84	20.412	0.059	4.15254	0.244	4.91803	0.03027	3.63396	-0.019378		192.1	7	216	10	978	96.05	192.1	7
BRJR13-K8a_34	47.9682	0.0503	2.8827	0.213	4.22535	0.0303	3.46535	0.04245		192.3	6.5	195.9	7.5	497	96.15	192.3	6.5
BRJR13-K8a_38	887.922	0.0503	1.78926	0.2082	3.60231	0.03044	3.44941	0.25719		193.3	6.5	192.3	6.5	218	96.65	193.3	6.5
BRJR13-K8a_5	426.951	0.0499	1.70341	0.2085	3.59712	0.03046	3.44714	0.12276		193.4	6.5	192.2	6.5	272	96.7	193.4	6.5
BRJR13-K8a_16	173.502	0.0492	2.03252	0.2102	3.56803	0.03048	3.44488	0.15198		193.5	6.5	193.2	6.5	305	96.75	193.5	6.5
BRJR13-K8a_29	182.007	0.0494	1.92308	0.2078	3.60924	0.03047	3.44601	0.17801		193.5	6.5	191.5	6.5	332	96.75	193.5	6.5
BRJR13-K8a_89	33.5097	0.0518	3.4749	0.218	4.3578	0.0305	3.60656	0.0092918		193.6	7	199	8	541	96.8	193.6	7
BRJR13-K8a_99	340.2	0.0513	1.75439	0.2196	3.64299	0.03053	3.43924	0.58667		193.8	6.5	201	6.5	317	96.9	193.8	6.5
BRJR13-K8a_22	340.2	0.0501	1.89621	0.2132	3.75235	0.03053	3.43924	0.42617		193.9	6.5	196.9	6.5	303	96.95	193.9	6.5
BRJR13-K8a_96	357.21	0.0486	2.57202	0.2059	4.12822	0.03054	3.43811	0.30295		193.9	6.5	189.7	7	252	96.95	193.9	6.5
BRJR13-K8a_33	158.533	0.0519	2.40848	0.22	4.09091	0.03056	3.43586	0.29044		194	6.5	201.1	7.5	362	97	194	6.5
BRJR13-K8a_102	472.878	0.0514	1.94553	0.217	3.68664	0.03061	3.43025	0.22054		194.4	6.5	199.1	6.5	280	97.2	194.4	6.5
BRJR13-K8a_24	421.848	0.0513	1.75439	0.2184	3.663	0.03064	3.42689	0.19539		194.6	6.5	200.3	6.5	288	97.3	194.6	6.5
BRJR13-K8a_15	260.253	0.0507	1.77515	0.216	3.7037	0.03075	3.41463	0.33131		195.2	6.5	199.2	6.5	300	97.6	195.2	6.5
BRJR13-K8a_2	392.931	0.0507	1.67653	0.2117	3.54275	0.03076	3.41352	0.21062		195.3	6.5	195	6.5	245	97.65	195.3	6.5
BRJR13-K8a_94	60.0453	0.0515	2.81553	0.215	4.18605	0.03085	3.56564	0.20649		195.8	7	199.1	8	484	97.9	195.8	7
BRJR13-K8a_4	236.439	0.0496	1.81452	0.2105	3.56295	0.03093	3.39476	-0.10598		196.3	6.5	193.5	6.5	249	98.15	196.3	6.5
BRJR13-K8a_95	46.9476	0.05	3	0.214	4.20561	0.03093	3.55642	0.13589		196.6	7	195.8	7.5	507	98.3	196.6	7
BRJR13-K8a_63	127.575	0.051	2.2549	0.2162	3.93154	0.03107	3.54039	0.40222		197.2	7	197.6	7	365	98.6	197.2	7
BRJR13-K8a_79	44.5662	0.0552	3.07971	0.229	4.36681	0.03116	3.53017	0.23552		197.8	7	209	8.5	611	98.9	197.8	7
BRJR13-K8a_74	336.798	0.0501	2.29541	0.2172	3.91344	0.03122	3.52338	0.19452		198.2	7	199.1	7	319	99.1	198.2	7
BRJR13-K8a_54	165.507	0.0491	2.03666	0.2109	3.79327	0.0313	3.51438	0.10548		198.7	6.5	193.8	6.5	293	99.35	198.7	6.5
BRJR13-K8a_49	927.045	0.0606	2.64026	0.257	4.47471	0.03137	3.50653	0.79977		199.1	7	231	9	561	99.55	199.1	7
BRJR13-K8a_44	452.466	0.0502	1.79283	0.219	3.65297	0.03145	3.49762	0.12022		199.6	6.5	201.2	6.5	259	99.8	199.6	6.5
BRJR13-K8a_10	250.047	0.0541	1.94085	0.235	3.61702	0.03158	3.48322	0.12916		200.4	7	214.1	7	443	100.2	200.4	7
BRJR13-K8a_73	30.2778	0.0532	3.57143	0.228	4.60526	0.03164	3.63464	0.0081213		200.7	7	207	8.5	700	100.35	200.7	7
BRJR13-K8a_70	147.817	0.0503	2.08748	0.2187	3.65798	0.03189	3.44936	0.1175		202.3	7	200.5	7	329	101.15	202.3	7
BRJR13-K8a_78	117.879	0.0505	2.17822	0.2217	3.83401	0.03199	3.43857	0.11901		202.9	7	202.8	7	397	101.45	202.9	7
BRJR13-K8a_50	1059.72	0.05064	1.67852	0.222	3.6036	0.03211	3.42572	0.42832		203.9	7	203.4	6.5	246	101.95	203.9	7
BRJR13-K8a_55	542.619	0.0506	1.97628	0.2243	3.56665	0.03231	3.55927	0.226		205	7	205.2	7	248	102.5	205	7
BRJR13-K8a_56	537.516	0.0505	1.9802	0.225	3.77778	0.03235	3.40031	0.34819		205.3	7	205.7	7	253	102.65	205.3	7
BRJR13-K8a_68	49.4991	0.0511	2.93542	0.229	4.14847	0.03243	3.5461	0.064416		206	7	207.5	8	516	103	206	7
BRJR13-K8a_77	45.0765	0.0516	3.10078	0.222	4.27928	0.03248	3.54064	0.13391		206	7	203.9	8	535	103	206	7
BRJR13-K8a_83	39.4632	0.0508	3.24803	0.223	4.4843	0.03246	3.54282	0.12029		206.1	7	202	8	517	103.05	206.1	7
BRJR13-K8a_75	335.097	0.0513	2.04678	0.2256	3.76773	0.03264	3.52328	0.27513		207	7	206.8	7	302	103.5	207	7
BRJR13-K8a_80	24.8346	0.0507	3.74753	0.223	4.70852	0.03266	3.67422	0.052222		207.1	7.5	204	8.5	655	103.55	207.1	7.5
BRJR13-K8a_85	39.2931	0.0533	3.00188	0.239	4.39331	0.03266	3.52113	0.21745		207.1	7	217	8.5	548	103.55	207.1	7
BRJR13-K8a_90	49.329	0.0522	3.16092	0.232	4.31034	0.03261	3.52653	0.03101		207.1	7	211	8.5	554	103.55	207.1	7
BRJR13-K8a_36	99.8487	0.0499	2.40481	0.227	4.18502	0.03271	3.6686	0.36794		207.4	7.5	206.1	7.5	396	103.7	207.4	7.5
BRJR13-K8a_101	287.469	0.0506	2.17391	0.2316	3.88601	0.03298	3.48696	0.29468		209.2	7	210.9	7.5	290	104.6	209.2	7
BRJR13-K8a_53	273.861	0.0502	2.29084	0.225	4	0.03305	3.47958	0.21477		209.6	7	206.3	7	286	104.8	209.6	7
BRJR13-K8a_35	160.574	0.0499	2.50501	0.233	4.07725	0.03354	3.42874	0.23614		212.7	7.5	211.3	7.5	380	106.35	212.7	7.5
BRJR13-K8a_26	326.592	0.0507	1.77515	0.2409	3.52844	0.03424	3.50467	0.33698		217	7.5	218.6	7	309	108.5	217	7.5
BRJR13-K8a_21	209.223	0.0504	2.08333	0.2395	3.75783	0.03439	3.48939	0.14304		218	7.5	218	7	331	109	218	7.5
BRJR13-K8a_43	236.439	0.0495	2.0202	0.2305	3.68764	0.03447	3.48129	0.39116		218.7	7.5	210.9	7	300	109.35	218.7	7.5
BRJR13-K8a_86	58.8546	0.0515	2.62136	0.245	4.08163	0.03463	3.4652	0.15298		219.4	7.5	221.9	8	444	109.7	219.4	7.5
BRJR13-K8a_27	1066.53	0.0493	1.72414	0.2397	3.75469	0.03519	3.41006	0.54345		222.9	7.5	218.8	7.5	196	111.45	222.9	7.5
BRJR13-K8a_52	171.801	0.0541	2.49538	0.2656	3.95331	0.03565	3.50631	0.14845		225.8	8	238.4	8	442	112.9	225.8	8
BRJR13-K8a_91	85.05	0.0512	3.125	0.264	4.54545	0.03743	3.60673	0.16009		236.8	8.5	236	9.5	450	118.4	236.8	8.5
BRJR13-K8a_28	202.419	0.0505	1.88119	0.2577	3.68646	0.03769	3.44919	0.35521		238.4	8	232	7.5	303	119.2	238.4	8
BRJR13-K8a_64	824.985	0.05501	1.54517	0.4006	3.49476	0.05309	3.39047	0.4973		333.5	11	342.3	10.5	409	166.75	333.5	11
BRJR13-K8a_7	416.745	0.05487	1.54912	0.4058	3.57319	0.05379	3.4393	0.67253		337.7	11.5	345.3	10.5	420	168.85	337.7	11.5
BRJR13-K8a_18	92.1942	0.055	2.09091	0.447	3.69128	0.05936	3.4535	0.019962		372	12.5	374.8	11.5	441	186	372	12.5
BRJR13-K8a_39	110.395	0.0549	1.82149	0.447	3.57942	0.05993	3.42066	0.22347		375.1	12.5	375.1	11.5	443	187.55	375.1	12.5
BRJR13-K8a_61	132.168	0.0535	2.05607	0.437	3.77574	0.06029	3.48316	0.20909		377.3	12.5	368	11.5	391	188.65	377.3	12.5
BRJR13-K8a_17	115.498	0.0582	1.89003	0.491	3.66599	0.06033	3.48086	0.20005		377.6	12.5	405	12	551	188.8	377.6	12.5
BRJR13-K8a_25	154.621	0.0541	1.75601	0.4747	3.58121	0.06368	3.45477	0.19358		397.9	13	394.8	12	367	198.95	397.9	13
BRJR13-K8a_12	542.619	0.05897	1.61099	0.5192	3.56317	0.0638	3.44828	0.57174		398.7	13.5	425	12.5	578	199.35	398.7	13.5
BRJR13-K8a_69	71.9523	0.0568	2.90493	0.503	4.27435	0.0642	3.58255	0.12844		400.9	14	413	14	525	200.45	400.9	14
BRJR13-K8a_93	92.5344	0.0555	1.89189	0.499	3.60721	0.06448	3.41191	0.22292		403.1	13.5	411.2	12	486	201.55	403.1	13.5
BRJR13-K8a_51	97.4673	0.0551	1.90563	0.498	3.71486	0.06537	3.44195	0.31945		408.1	13.5	408.7	12.5	441	204.05	408.1	13.5
BRJR13-K8a_45	159.724	0.0547	2.01097	0.492	3.76016	0.06547	3.43669	0.20258		408.8	13.5	405	12.5	430	204.4	408.8	13.5
BRJR13-K8a_103	205.821	0.0555	1.89189	0.506	3.65613	0.06595	3.41168	0.11809		411.7	13.5	415.1	12.5	461	205.85	411.7	13.5
BRJR13-K8a_6	409.941	0.0547	1.55393	0.4952	3.53393	0.06641	3.46333	0.48857		414.4	14	408.6	12	405	207.2	414.4	14
BRJR13-K8a_71	183.708	0.0581	2.15146	0.528	3.78788	0.06715	3.42517	0.2249		418.9	14	430	13.5	502	209.45	418.9	14
BRJR13-K8a_13	437.157	0.0648	2.16049	0.648	3.85802	0.0731	3.48837	0.50542		454.6	15.5	505	14.5	722	227.3	454.6	15.5
BRJR13-K8a_65	157.172	0.0722	1.80055	0.959	3.64964	0.0992	3.47782	0.46847		609.3	20.5	683	18.5	980	304.65	609.3	20.5
BRJR13-K8a_57	119.24	0.0791	1.89633	2.102	3.8059	0.1909	3.40492	0.44302		1126	36.5	1147	25.5	1169	584.5	1169	20
BRJR13-K8a_58	210.924	0.0788	1.64975	1.697	3.53565	0.1595	3.44828	0.6633		954	31	1007	23	1173	586.5	1173	18
BRJR13-K8a_100	157.683	0.08191	1.46502	2.212	3.3906	0.1941	3.34879	0.44871		1144.7	36	1183.7	24.5	1248	624	1248	15.5
BRJR13-K8a_42	28.7469	0.0855	2.22222	2.526	3.95883	0.2133	3.51617	0.43683		1246	40	1278	27.5	1319	659.5	1319	20
BRJR13-K8a_32	182.007	0.0919	1.52339	2.78	3.95683	0.217	3.68664	0.95308		1260	43.5	1325	31	1469	734.5	1469	23
BRJR13-K8a_40	115.838	0.0944	1.58898	3.229	3.56147	0.25	3.4	0.58549		1438	44.5	1464	28.5	1517	758.5	1517	16
BRJR13-K8a_67	99.3384	0.1007	1.58888	3.403	3.5263	0.2478	3.43019	0.60242		1427	44.5	1504	27.5	1637	818.5	1637	18
BRJR13-K8a_14	152.069	0.1085	1.6129	3.415	3.51391	0.2264	3.53357	0.53897		1316	41	1509	28.5	1777	888.5	1777	18
BRJR13-K8a_11	101.039	0.1199	1.45955	5.408	3.42086	0.327	3.36391	0.6633		1824	55	1884.7	30	1957.4	978.7	1957.4	16
BRJR13-K8a_48	44.7363	0.1652	1.48305	10.56	3.50379	0.4648	3.44234	0.72769		2460	70	2488	32	2513.8	1256.9	2513.8	13
BRJR13-K8a_30	63.4473	0.2038	1.4475	16.3	3.37423	0.5784	3.45781	0.79198		2946	80	2894	33.5	2844.7	1422.35	2844.7	16.5
BRJR13-K8a_31	119.07	0.2129	1.50305	11.63	3.61135	0.3968	3.52823	0.80526		2150	65	2569	33	2921	1460.5	2921	20
BRJR13-K10_Type 1
					Isotopic Ratios							Apparent Ages
Analysis	U	207Pb*	±	207Pb*	±	206Pb*	±	error		206Pb*	±	207Pb*	±	206Pb*	±	Best	±
	(ppm)	206Pb*	(%)	235U	(%)	238U	(%)	corr.		238U	Ma	235U	Ma	207Pb*	Ma	Age†	Ma††
BRJR13-K10_72	1486.67	0.04912	2.23941	0.1347	3.67483	0.02	3.5	0.34645		127.6	4.3	128.4	4.5	150	49	127.6	4.3
BRJR13-K10_6	170.95	0.0497	2.51509	0.2245	3.78619	0.03184	3.45477	0.099978		202.2	6.5	205.5	7	174	50	202.2	6.5
BRJR13-K10_10	407.219	0.05051	2.27678	0.2243	3.78957	0.03217	3.41933	0.132		204.1	7	205.2	7	215	50	204.1	7
BRJR13-K10_7	143.224	0.0538	2.50929	0.2452	3.87439	0.03233	3.40241	0.080045		205.1	7	222.8	7.5	363	55	205.1	7
BRJR13-K10_49	258.212	0.0541	2.40296	0.2459	3.86336	0.03272	3.36186	0.26036		207.5	7	222.8	7.5	360	55	207.5	7
BRJR13-K10_41	187.45	0.0512	2.53906	0.2376	3.78788	0.03273	3.36083	0.088108		207.6	7	216.5	7.5	245	55	207.6	7
BRJR13-K10_45	164.487	0.0504	2.48016	0.2387	3.77042	0.03409	3.37342	0.19878		216.1	7	217.1	7.5	212	50	216.1	7
BRJR13-K10_13	86.751	0.0506	2.7668	0.262	4.00763	0.03653	3.42185	0.030347		231.3	8	235.2	8.5	217	55	231.3	8
BRJR13-K10_57	61.5762	0.0544	3.125	0.274	4.19708	0.03667	3.54513	0.23623		232.4	8	243.2	9	334	60	232.4	8
BRJR13-K10_27	47.8321	0.0532	2.91353	0.293	4.09556	0.04087	3.4255	0.208		258.2	9	259.4	9.5	311	60	258.2	9
BRJR13-K10_78	131.827	0.0526	2.75665	0.297	4.0404	0.04211	3.5621	0.029148		265.8	9	263.6	9	289	55	265.8	9
BRJR13-K10_18	300.056	0.056	2.41071	0.436	3.7844	0.05579	3.40563	0.56859		349.9	11.5	367.3	12	448	55	349.9	11.5
BRJR13-K10_48	526.289	0.05363	2.23755	0.4388	3.64631	0.05929	3.37325	0.36274		371.3	12	369.3	11.5	355	49	371.3	12
BRJR13-K10_37	818.011	0.05428	2.21076	0.4524	3.64721	0.0597	3.35008	0.49685		373.8	12.5	379.2	11.5	379	49.5	373.8	12.5
BRJR13-K10_11	262.464	0.057	2.36842	0.484	3.71901	0.06086	3.45054	0.1777		380.8	12.5	399.9	12.5	485	50	380.8	12.5
BRJR13-K10_24	680.4	0.05654	2.21082	0.4685	3.6286	0.06123	3.42969	0.53252		383.1	12.5	391.3	12	478	50	383.1	12.5
BRJR13-K10_43	77.1063	0.0574	2.52613	0.499	3.80762	0.06138	3.42131	0.12384		384.6	12.5	410.6	13	493	55	384.6	12.5
BRJR13-K10_25	181.327	0.0531	2.35405	0.4401	3.74915	0.06188	3.39367	0.18285		387	13	370	11.5	324	50	387	13
BRJR13-K10_35	310.092	0.05372	2.2338	0.4568	3.72154	0.06247	3.44165	0.42432		390.6	13	381.4	11.5	353	50	390.6	13
BRJR13-K10_73	335.777	0.05499	2.27314	0.4715	3.71156	0.06273	3.34768	0.34378		392.4	13	392.4	12	402	49.5	392.4	13
BRJR13-K10_74	573.407	0.05592	2.32475	0.4815	3.73832	0.06322	3.40082	0.4354		395.1	13	399.5	12.5	445	55	395.1	13
BRJR13-K10_15	423.209	0.05469	2.19419	0.4915	3.66226	0.06344	3.38903	0.39168		396.5	13	405.8	12	399	49.5	396.5	13
BRJR13-K10_21	615.762	0.05561	2.2478	0.4963	3.62684	0.06432	3.4204	0.57142		401.8	13.5	409.4	12.5	432	49.5	401.8	13.5
BRJR13-K10_16	58.5484	0.0558	2.50896	0.513	3.80117	0.06504	3.38253	0.14402		406.2	13.5	419	13	416	55	406.2	13.5
BRJR13-K10_34	200.378	0.05438	2.29864	0.4845	3.71517	0.06538	3.44142	0.21418		408.2	13.5	401.8	12	384	50	408.2	13.5
BRJR13-K10_53	361.122	0.05448	2.29442	0.496	3.62903	0.0659	3.41426	0.30168		411.4	13.5	409.5	12.5	390	50	411.4	13.5
BRJR13-K10_67	388.168	0.0543	2.20994	0.4872	3.69458	0.06602	3.40806	0.5223		412.1	13.5	402.8	12	379	49.5	412.1	13.5
BRJR13-K10_26	711.018	0.05594	2.23454	0.5035	3.67428	0.06736	3.41449	0.45388		420.2	14	414	12.5	449	49	420.2	14
BRJR13-K10_4	525.609	0.05484	2.27936	0.5248	3.7157	0.06743	3.41094	0.32486		420.6	14	428	13	403	50	420.6	14
BRJR13-K10_61	790.965	0.0564	2.30496	0.549	3.73406	0.06996	3.43053	0.6241		435.9	14.5	443.9	13.5	456	50	435.9	14.5
BRJR13-K10_81	248.516	0.05533	2.25917	0.5404	3.70096	0.07047	3.4057	0.3675		438.9	14.5	438.2	13	415	50	438.9	14.5
BRJR13-K10_31	841.995	0.05508	2.17865	0.5196	3.65666	0.0709	3.38505	0.68334		441.5	14.5	424.5	12.5	413	49.5	441.5	14.5
BRJR13-K10_20	137.101	0.0552	2.53623	0.537	3.8175	0.0712	3.44101	0.16287		443.4	14.5	435.5	13.5	395	55	443.4	14.5
BRJR13-K10_77	518.805	0.05514	2.26696	0.5336	3.65442	0.07125	3.36842	0.45382		443.6	14.5	433.6	13	411	50	443.6	14.5
BRJR13-K10_28	176.785	0.0557	2.4237	0.527	3.79507	0.07133	3.43474	0.41028		444.1	14.5	428	13	408	50	444.1	14.5
BRJR13-K10_38	83.6892	0.0543	2.48619	0.547	3.74771	0.07144	3.35946	0.2264		445.1	14.5	444.1	14	370	50	445.1	14.5
BRJR13-K10_79	903.231	0.05522	2.17313	0.5463	3.66099	0.07173	3.41559	0.4939		446.6	14.5	442.6	13	422	49	446.6	14.5
BRJR13-K10_66	462.672	0.05695	2.2827	0.573	3.75218	0.07239	3.38445	0.60685		450.5	15	459.1	13.5	490	49.5	450.5	15
BRJR13-K10_3	689.755	0.05562	2.1575	0.5758	3.6471	0.07291	3.42888	0.58541		453.6	15	462	13.5	436	48.5	453.6	15
BRJR13-K10_29	469.476	0.05549	2.16255	0.5646	3.63089	0.0767	3.38983	0.39495		476.4	15.5	454.1	13.5	429	50	476.4	15.5
BRJR13-K10_8	201.568	0.0628	2.62739	0.678	3.9823	0.07672	3.38895	0.37569		476.5	15.5	521	15.5	658	55	476.5	15.5
BRJR13-K10_64	1791.15	0.06159	2.19191	0.651	3.68664	0.0769	3.44603	0.75843		477.4	16	509	15	657	47.5	477.4	16
BRJR13-K10_44	517.954	0.0586	2.21843	0.783	3.63985	0.09612	3.43321	0.51726		591.6	19.5	587.4	16	556	47	591.6	19.5
BRJR13-K10_40	523.228	0.06024	2.15803	0.817	3.61077	0.0962	3.37838	0.54111		592	19	607.2	16.5	612	47	592	19
BRJR13-K10_52	247.836	0.05842	2.22527	0.776	3.67268	0.0963	3.42679	0.37531		592.6	19.5	583.2	16.5	543	48	592.6	19.5
BRJR13-K10_50	38.8678	0.0644	2.95031	0.852	4.0493	0.0968	3.5124	0.1996		595	20	627	18.5	734	60	595	20
BRJR13-K10_1	302.268	0.06024	2.24104	0.8509	3.6432	0.10069	3.42636	0.39775		618.4	20	625.4	16.5	613	49.5	618.4	20
BRJR13-K10_55	478.151	0.06109	2.20985	0.942	3.66242	0.1131	3.40407	0.53016		690.8	22.5	673.2	18	644	47	690.8	22.5
BRJR13-K10_23	116.518	0.06102	2.29433	0.949	3.68809	0.11456	3.40433	0.22835		699	22.5	677	18.5	640	49	699	22.5
BRJR13-K10_2	352.957	0.06184	2.18305	1.012	3.60672	0.11572	3.3702	0.49459		706.2	22.5	710	18.5	667	46.5	706.2	22.5
BRJR13-K10_47	164.317	0.0748	2.27273	1.608	3.73134	0.1551	3.5461	0.51036		929.2	29.5	972	23	1062	45.5	929.2	29.5
BRJR13-K10_17	186.259	0.07178	2.22903	1.613	3.71978	0.1587	3.46566	0.15428		949.5	30	973.4	23	971	45	949.5	30
BRJR13-K10_58	433.755	0.07007	2.14072	1.672	3.58852	0.1723	3.4823	0.55319		1024.6	32	997.6	23	931	45	1024.6	32
BRJR13-K10_19	126.214	0.07561	2.24838	1.838	3.53645	0.1751	3.42661	0.46022		1040.5	33	1057.8	24	1078	44	1040.5	33
BRJR13-K10_71	423.549	0.07734	2.19809	1.897	3.69004	0.179	3.35196	0.78378		1061	33.5	1079	24	1129	43	1061	33.5
BRJR13-K10_59	168.909	0.07247	2.20781	1.869	3.74532	0.1861	3.49275	0.43376		1100.2	34.5	1070.7	24	996	45.5	1100.2	34.5
BRJR13-K10_32	112.266	0.07444	2.21655	1.884	3.7155	0.1888	3.4428	0.44292		1114.6	35	1074.8	24	1051	45.5	1114.6	35
BRJR13-K10_51	82.6686	0.07529	2.25794	2.056	3.64786	0.1963	3.31126	0.44026		1156.5	36	1132.9	25	1075	44	1156.5	36
BRJR13-K10_56	105.292	0.0793	2.26986	2.141	3.73657	0.1985	3.52645	0.44025		1167	36.5	1158	24	1170	44	1167	36.5
BRJR13-K10_9	202.249	0.08181	2.20022	2.395	3.54906	0.2105	3.32542	0.47418		1231	38	1240.5	26	1239	42.5	1231	38
BRJR13-K10_33	162.888	0.08045	2.17526	2.368	3.58953	0.2175	3.44828	0.47543		1268.2	39	1234	26	1206	44	1268.2	39
BRJR13-K10_68	334.246	0.08452	2.18883	2.711	3.68868	0.2314	3.45722	0.59981		1342	41	1330.7	27	1306	41.5	1342	41
BRJR13-K10_63	550.274	0.08416	2.19819	2.735	3.65631	0.2341	3.41734	0.58861		1356	41.5	1337.5	27	1294	42.5	1356	41.5
BRJR13-K10_65	265.696	0.0881	2.15664	2.974	3.69872	0.2461	3.45388	0.66698		1419	42.5	1400	27.5	1384	42.5	1419	42.5
BRJR13-K10_39	214.666	0.09061	2.15208	3.298	3.63857	0.2567	3.31126	0.54964		1473.4	44.5	1480.9	28	1437	42	1437	42
BRJR13-K10_76	814.779	0.09434	2.17299	2.869	3.65981	0.2221	3.37686	0.77526		1293	40.5	1374.5	26.5	1514	41	1514	41
BRJR13-K10_42	32.37	0.0977	2.30297	4.116	3.76579	0.298	3.52349	0.50841		1680	50	1659	31	1597	44	1597	44
BRJR13-K10_70	303.118	0.10025	2.14464	4.127	3.6346	0.2995	3.3389	0.91815		1688	50	1657.3	29.5	1627	40	1627	40
BRJR13-K10_14	282.196	0.10928	2.15044	4.849	3.60899	0.3138	3.34608	0.70953		1758.9	55	1792.5	30.5	1787.3	40	1787.3	40
BRJR13-K10_5	209.903	0.11109	2.16041	4.959	3.62976	0.312	3.36538	0.70692		1750.2	50	1811.1	31	1815	39.5	1815	39.5
BRJR13-K10_69	78.0759	0.111	2.20721	5.328	3.65991	0.3483	3.44531	0.58649		1926	55	1874	32	1815	40	1815	40
BRJR13-K10_62	32.7613	0.1116	2.24014	5.168	3.67647	0.3332	3.45138	0.55712		1852	55	1846	31.5	1821	40.5	1821	40.5
BRJR13-K10_80	220.62	0.11152	2.15208	5.072	3.64748	0.3309	3.47537	0.73915		1843	55	1829.8	30.5	1823	40	1823	40
BRJR13-K10_30	126.724	0.1119	2.18945	5.277	3.60053	0.3549	3.38123	0.64522		1957	60	1864	31	1828	39.5	1828	39.5
BRJR13-K10_46	141.676	0.11717	2.17632	5.846	3.5922	0.3621	3.45209	0.72787		1992	60	1952.4	31.5	1911	39	1911	39
BRJR13-K10_82	440.899	0.11768	2.16689	5.986	3.67524	0.3696	3.38203	0.73075		2027	60	1972.9	31.5	1920	39	1920	39
BRJR13-K10_75	651.143	0.1226	2.20228	6.089	3.69519	0.3605	3.46741	0.76894		1984	60	1986	32	1991	38.5	1991	38.5
BRJR13-K10_12	143.394	0.12575	2.18688	6.489	3.62151	0.3708	3.37109	0.73342		2032	60	2043	32	2042	38	2042	38
BRJR13-K10_22	97.9776	0.1833	2.15494	13.43	3.61132	0.5285	3.40587	0.73994		2735	75	2709.9	34	2682.1	36	2682.1	36
BRJR13-K10_36	129.276	0.18379	2.14919	13.49	3.63232	0.5246	3.33587	0.83286		2720	75	2715.5	34	2686.8	36	2686.8	36
BRJR13-K13a_Type 1
					Isotopic Ratios							Apparent Ages
Analysis	U	207Pb*	±	207Pb*	±	206Pb*	±	error		206Pb*	±	207Pb*	±	206Pb*	±	Best	±
	(ppm)	206Pb*	(%)	235U	(%)	238U	(%)	corr.		238U	Ma	235U	Ma	207Pb*	Ma	Age†	Ma††
BRJR13-K13a_63	184.865	0.0518	2.41313	0.2207	3.85138	0.0305	3.44262	0.26374		193.6	6.5	202.4	7	269	50	193.6	6.5
BRJR13-K13a_60	182.857	0.0511	2.54403	0.2256	3.76773	0.03097	3.39038	-0.028117		196.6	6.5	205.4	7	225	50	196.6	6.5
BRJR13-K13a_25	208.883	0.0504	2.48016	0.2154	3.71402	0.03114	3.37187	0.28126		197.6	6.5	197.5	7	220	48.5	197.6	6.5
BRJR13-K13a_34	247.325	0.0537	2.42086	0.2339	3.8478	0.03195	3.44288	0.083856		202.7	7	214	7.5	342	50	202.7	7
BRJR13-K13a_69	119.699	0.0552	2.62681	0.2478	3.83374	0.03195	3.44288	0.22215		202.7	7	224.3	8	406	55	202.7	7
BRJR13-K13a_95	273.691	0.0502	2.49004	0.2159	3.70542	0.03204	3.43321	-0.12843		203.3	7	198	7	195	50	203.3	7
BRJR13-K13a_76	60.8788	0.0535	3.27103	0.247	4.25101	0.03395	3.53461	0.0582		215.2	7.5	224.1	8.5	321	60	215.2	7.5
BRJR13-K13a_23	94.0653	0.0519	2.89017	0.2388	3.97822	0.03407	3.52216	-0.017038		215.9	7.5	216.7	8	265	60	215.9	7.5
BRJR13-K13a_83	3009.07	0.04997	2.20132	0.2382	3.56843	0.03489	3.43938	0.6682		221.1	7.5	216.8	7	193	49.5	221.1	7.5
BRJR13-K13a_32	1054.62	0.05622	2.22341	0.4178	3.59023	0.05396	3.3358	0.37117		338.8	11	354.3	11	459	48.5	338.8	11
BRJR13-K13a_44	220.62	0.05415	2.3084	0.4485	3.67893	0.05834	3.42818	0.3063		365.5	12	375.9	11.5	359	50	365.5	12
BRJR13-K13a_67	69.5539	0.0562	2.58007	0.465	3.87097	0.06004	3.41439	0.27342		375.8	12.5	385.6	12.5	436	55	375.8	12.5
BRJR13-K13a_93	447.363	0.05467	2.19499	0.4452	3.59389	0.06015	3.40815	0.46524		376.5	12.5	373.9	11.5	402	49	376.5	12.5
BRJR13-K13a_71	760.347	0.05545	2.16411	0.4881	3.68777	0.06205	3.38437	0.40564		388.1	12.5	403.2	12	424	46	388.1	12.5
BRJR13-K13a_28	850.5	0.05481	2.18938	0.4745	3.58272	0.0622	3.37621	0.56345		388.9	13	394.6	12	402	49.5	388.9	13
BRJR13-K13a_37	38.0514	0.0575	2.95652	0.502	4.08367	0.0635	3.46457	0.13114		396.5	13.5	413	13.5	474	60	396.5	13.5
BRJR13-K13a_84	1132.87	0.05446	2.20345	0.4716	3.60475	0.06361	3.37997	0.57163		397.5	13	392.1	12	390	50	397.5	13
BRJR13-K13a_91	453.827	0.05491	2.18539	0.4732	3.59256	0.06404	3.35728	0.32809		400.1	13	393.6	11.5	405	48.5	400.1	13
BRJR13-K13a_92	254.81	0.05466	2.28686	0.4753	3.68189	0.0642	3.42679	0.14215		401.1	13	394.3	12	394	50	401.1	13
BRJR13-K13a_55	498.393	0.05573	2.24296	0.4906	3.66898	0.06475	3.39768	0.32553		404.4	13.5	405.6	12.5	437	49.5	404.4	13.5
BRJR13-K13a_42	678.529	0.05543	2.16489	0.5194	3.65807	0.0657	3.42466	0.55705		410.1	13.5	424.4	12.5	431	50	410.1	13.5
BRJR13-K13a_66	312.133	0.05506	2.27025	0.4961	3.6283	0.0661	3.40393	0.39777		412.6	13.5	409.2	12	414	50	412.6	13.5
BRJR13-K13a_61	437.497	0.05739	2.2652	0.5426	3.68596	0.06661	3.45293	0.46769		415.7	14	440.2	13	498	49	415.7	14
BRJR13-K13a_96	163.976	0.0551	2.35935	0.5042	3.76835	0.06704	3.35621	0.21973		418.2	13.5	415	12.5	410	50	418.2	13.5
BRJR13-K13a_40	224.022	0.05411	2.31011	0.5132	3.70226	0.0678	3.39233	0.37506		422.9	14	419.8	12.5	369	50	422.9	14
BRJR13-K13a_43	334.246	0.0559	2.41503	0.535	3.73832	0.06784	3.39033	0.32572		423.1	14	435.3	13.5	444	55	423.1	14
BRJR13-K13a_90	169.335	0.05448	2.29442	0.4969	3.72308	0.06836	3.36454	0.29101		426.5	14	409.2	12.5	377	50	426.5	14
BRJR13-K13a_59	286.618	0.05716	2.27432	0.5591	3.66661	0.06918	3.39694	0.29056		431.2	14	450.6	13.5	493	50	431.2	14
BRJR13-K13a_50	105.122	0.0541	2.40296	0.518	3.76448	0.07004	3.42661	0.28911		436.3	14.5	423	13	360	50	436.3	14.5
BRJR13-K13a_58	88.9623	0.0557	2.4237	0.551	3.81125	0.07026	3.41588	0.33052		437.7	14.5	447.5	13.5	424	55	437.7	14.5
BRJR13-K13a_4	486.656	0.05476	2.19138	0.5455	3.66636	0.07059	3.39992	0.43322		439.7	14.5	441.7	13	399	50	439.7	14.5
BRJR13-K13a_2	530.712	0.0604	2.31788	0.602	3.73754	0.071	3.4507	0.55003		442.1	15	478.8	14.5	612	49.5	442.1	15
BRJR13-K13a_33	514.553	0.05537	2.16724	0.5439	3.67715	0.0713	3.36606	0.41127		444	14.5	441.2	13	427	50	444	14.5
BRJR13-K13a_86	415.724	0.0552	2.17391	0.5319	3.6661	0.07187	3.40893	0.49432		447.3	14.5	432.5	13	419	48	447.3	14.5
BRJR13-K13a_14	629.37	0.05496	2.18341	0.5358	3.63942	0.07189	3.33843	0.48243		447.5	14.5	435.3	13	406	50	447.5	14.5
BRJR13-K13a_73	558.098	0.05662	2.2077	0.5645	3.63153	0.07197	3.4042	0.40462		448	14.5	453.9	13.5	462	47	448	14.5
BRJR13-K13a_12	480.192	0.05561	2.2478	0.5427	3.68528	0.07213	3.39664	0.37587		448.9	14.5	439.8	13	435	50	448.9	14.5
BRJR13-K13a_64	305.159	0.0564	2.30496	0.5684	3.69458	0.0724	3.38398	0.25214		450.6	15	457.2	14	468	50	450.6	15
BRJR13-K13a_89	653.184	0.0548	2.18978	0.5356	3.64078	0.07249	3.37978	0.42969		451.1	15	435.1	13	405	50	451.1	15
BRJR13-K13a_36	1211.11	0.05626	2.13295	0.5589	3.57846	0.07265	3.37233	0.46832		452.1	15	451.1	13	461	48	452.1	15
BRJR13-K13a_85	79.947	0.0607	2.63591	0.592	3.96959	0.0728	3.57143	0.47518		453	16	472	15.5	606	55	453	16
BRJR13-K13a_41	165.847	0.0549	2.36794	0.571	3.76532	0.073	3.42466	0.29913		454.2	15	457.8	13.5	396	55	454.2	15
BRJR13-K13a_16	298.185	0.0595	2.35294	0.585	3.67521	0.07352	3.40044	0.26778		457.8	15	466.7	14	561	49.5	457.8	15
BRJR13-K13a_52	94.5586	0.0553	2.44123	0.549	3.82514	0.0737	3.39213	#N/A		458.3	15	442.3	13.5	406	55	458.3	15
BRJR13-K13a_30	600.453	0.05535	2.16802	0.5716	3.6739	0.07375	3.38983	0.6417		458.7	15	459	13.5	429	49	458.7	15
BRJR13-K13a_56	580.551	0.05582	2.23934	0.5624	3.64509	0.0738	3.38753	0.31946		459	15	453.1	13	447	49.5	459	15
BRJR13-K13a_17	131.147	0.0562	2.40214	0.559	3.75671	0.07425	3.43434	0.34555		461.6	15.5	450.1	13.5	448	55	461.6	15.5
BRJR13-K13a_82	329.484	0.05593	2.23494	0.5732	3.66364	0.07446	3.35751	0.32774		462.9	15	459.9	13.5	449	48.5	462.9	15
BRJR13-K13a_39	364.014	0.05869	2.30022	0.626	3.67412	0.07666	3.3916	0.38201		476.1	15.5	493.6	14.5	552	50	476.1	15.5
BRJR13-K13a_6	167.719	0.0572	2.44755	0.628	3.74204	0.07754	3.41759	0.18651		481.4	16	494.4	15	483	55	481.4	16
BRJR13-K13a_8	132.678	0.0559	2.32558	0.601	3.74376	0.07785	3.40398	0.31731		483.2	16	478.2	14	437	50	483.2	16
BRJR13-K13a_5	303.969	0.056	2.23214	0.6177	3.64254	0.07813	3.39178	0.38154		484.9	16	488.6	14	452	49	484.9	16
BRJR13-K13a_46	367.246	0.0573	2.26876	0.6326	3.63579	0.07916	3.41081	0.41981		491	16	498.1	14	496	50	491	16
BRJR13-K13a_24	37.1498	0.0567	2.73369	0.611	4.00982	0.08	3.5	0.30089		495.8	17	484	15	435	60	495.8	17
BRJR13-K13a_65	54.0238	0.0593	2.52951	0.731	3.83037	0.0911	3.45774	0.22528		561.6	18.5	555	16.5	541	55	561.6	18.5
BRJR13-K13a_31	177.925	0.0586	2.4744	0.739	3.7889	0.09109	3.40323	0.28227		561.9	18.5	562.8	16.5	549	55	561.9	18.5
BRJR13-K13a_68	69.0606	0.0594	2.44108	0.777	3.7323	0.0944	3.38983	0.1876		581.2	19	583.5	17	569	55	581.2	19
BRJR13-K13a_81	104.271	0.0753	2.65604	0.978	3.93661	0.0957	3.44828	0.33107		589	19.5	694	20.5	1070	50	589	19.5
BRJR13-K13a_7	481.553	0.05858	2.21919	0.7882	3.61583	0.09592	3.38824	0.38883		590.4	19	589.7	16	552	49	590.4	19
BRJR13-K13a_20	391.23	0.05892	2.20638	0.792	3.66162	0.10107	3.41348	0.6779		620.6	20	591.3	16.5	562	47.5	620.6	20
BRJR13-K13a_29	310.773	0.06202	2.17672	0.936	3.63248	0.10753	3.3944	0.56606		658.3	21	670.6	18	679	46	658.3	21
BRJR13-K13a_77	105.496	0.0627	2.3126	1.041	3.69837	0.1213	3.42127	0.25429		738.1	24	722.2	19	684	46	738.1	24
BRJR13-K13a_94	197.486	0.071	2.1831	1.438	3.47705	0.15	3.33333	0.52892		900.7	28.5	906.5	22	957	45	900.7	57
BRJR13-K13a_100	168.569	0.07453	2.21387	1.808	3.59513	0.1742	3.44432	0.41743		1035.2	32.5	1048.5	23	1050	44	1035.2	65
BRJR13-K13a_62	129.786	0.082	2.2561	2.123	3.76825	0.1852	3.50972	0.53807		1095.7	35	1158	24.5	1246	45	1095.7	70
BRJR13-K13a_79	51.9826	0.0775	2.32258	1.995	3.7594	0.1886	3.44645	0.48796		1113	35	1115	25	1131	45.5	1113	70
BRJR13-K13a_10	180.986	0.0804	2.301	2.094	3.82044	0.1889	3.44097	0.61909		1115.3	35	1141	24.5	1187	43.5	1115.3	70
BRJR13-K13a_3	287.979	0.07487	2.20382	2.124	3.53107	0.1998	3.5035	0.56757		1173.8	36.5	1155.6	25	1063	44.5	1173.8	73
BRJR13-K13a_38	102.4	0.08404	2.20133	2.82	3.7234	0.2424	3.5066	0.60879		1399	43	1361.6	27.5	1299	43	1299	43
BRJR13-K13a_48	93.555	0.08656	2.19501	2.999	3.66789	0.2513	3.38241	0.5572		1445	44	1407	28	1350	42	1350	42
BRJR13-K13a_97	93.555	0.08692	2.24344	2.831	3.70894	0.2368	3.37838	0.49621		1370	42	1365.8	27	1352	42.5	1352	42.5
BRJR13-K13a_49	246.305	0.09048	2.21043	3.021	3.64118	0.2416	3.31126	0.62037		1395	43	1412	28	1435	42.5	1435	42.5
BRJR13-K13a_9	112.266	0.0911	2.19539	3.305	3.63086	0.2637	3.41297	0.48687		1509	46	1482.5	28.5	1446	41.5	1446	41.5
BRJR13-K13a_22	59.2798	0.0917	2.29008	3.132	3.67178	0.2554	3.32811	0.52925		1465	45	1440	28.5	1455	42.5	1455	42.5
BRJR13-K13a_99	117.879	0.09147	2.18651	3.2	3.59375	0.2525	3.36634	0.57241		1451.6	44.5	1457.6	28.5	1458	40.5	1458	40.5
BRJR13-K13a_19	130.126	0.09297	2.20501	3.284	3.65408	0.2646	3.40136	0.54258		1513	46	1477.1	28.5	1486	42	1486	42
BRJR13-K13a_57	117.879	0.10059	2.1871	4.113	3.64697	0.2934	3.40832	0.64591		1658	50	1657.7	30	1640	41	1640	41
BRJR13-K13a_75	167.889	0.10527	2.18486	4.809	3.63901	0.3333	3.45035	0.70986		1855	55	1786.4	31.5	1718	40.5	1718	40.5
BRJR13-K13a_98	183.368	0.10619	2.16593	4.556	3.6216	0.3106	3.38055	0.67334		1743	50	1739.9	30	1733	39.5	1733	39.5
BRJR13-K13a_15	75.3203	0.1113	2.20126	5.181	3.66725	0.3458	3.47021	0.69937		1915	55	1848	31.5	1818	39	1818	39
BRJR13-K13a_26	47.8321	0.1121	2.23015	5.081	3.64102	0.3287	3.34652	0.66041		1831	55	1831	30.5	1833	40.5	1833	40.5
BRJR13-K13a_78	166.018	0.11251	2.17758	5.369	3.63196	0.35	3.42857	0.65691		1935	55	1880.6	31	1840	40	1840	40
BRJR13-K13a_1	123.152	0.1139	2.15101	5.637	3.63669	0.351	3.4188	0.70083		1939	55	1920.3	31.5	1862	39	1862	39
BRJR13-K13a_72	421.338	0.11562	2.16226	5.548	3.6049	0.3414	3.36848	0.75246		1894	55	1907.8	31	1889.7	39	1889.7	39
BRJR13-K13a_87	113.967	0.11583	2.15834	5.69	3.60281	0.364	3.43407	0.77123		2000	60	1931.5	32.5	1892	40	1892	40
BRJR13-K13a_88	75.5244	0.1163	2.19261	5.694	3.60028	0.3632	3.44163	0.71108		2000	60	1931	32.5	1902	39	1902	39
BRJR13-K13a_51	79.947	0.1188	2.18855	5.542	3.60881	0.3475	3.45324	0.71494		1924	55	1908	32.5	1936	39.5	1936	39.5
BRJR13-K13a_13	168.569	0.11924	2.18048	5.937	3.62136	0.3661	3.41437	0.71771		2010	60	1966.4	31.5	1944	38.5	1944	38.5
BRJR13-K13a_18	292.572	0.11939	2.13586	5.534	3.61402	0.3467	3.31699	0.71392		1919.1	55	1906.4	31	1945.9	38.5	1945.9	38.5
BRJR13-K13a_53	126.384	0.1347	2.19005	7.454	3.62222	0.4102	3.41297	0.69988		2215	65	2168.6	33	2160	37.5	2160	37.5
BRJR13-K13a_21	132.848	0.14875	2.15126	8.749	3.60041	0.4397	3.41142	0.81618		2348	65	2311.3	33.5	2331.8	37	2331.8	37
BRJR13-K13a_47	109.034	0.16107	2.17297	10.74	3.63128	0.4753	3.36629	0.81272		2506	70	2499.9	34	2467	36.5	2467	36.5
BRJR13-K13a_54	276.412	0.17107	2.16286	11.555	3.63479	0.4991	3.40613	0.84571		2610	75	2567.9	34	2567.8	36	2567.8	36
BRJR13-K13a_80	59.501	0.1872	2.19017	14.07	3.55366	0.548	3.46715	0.74086		2815	80	2756	35	2716	35.5	2716	35.5
BRK14-1_Type 1
					Isotopic Ratios							Apparent Ages
Analysis	U	207Pb*	±	207Pb*	±	206Pb*	±	error		206Pb*	±	207Pb*	±	206Pb*	±	Best	±
	(ppm)	206Pb*	(%)	235U	(%)	238U	(%)	corr.		238U	Ma	235U	Ma	207Pb*	Ma	Age†	Ma††
BRK14-1_35	69.5709	0.0511	2.15264	0.2413	4.14422	0.03499	4.85853	0.021236		221.6	10.5	218	8.5	214	42.5	221.6	10.5
BRK14-1_59	355.679	0.0637	1.64835	0.355	3.94366	0.04148	4.8216	0.44228		262.2	12.5	306.8	10.5	732	35	262.2	12.5
BRK14-1_66	989.982	0.05584	0.868553	0.431	3.7123	0.05384	4.92199	0.66438		338	16	364.1	11.5	444	19	338	16
BRK14-1_65	204.46	0.0638	1.72414	0.482	3.83817	0.05433	4.69354	0.22882		341	15.5	399	13	716	37	341	15.5
BRK14-1_32	439.538	0.0571	1.31349	0.4695	3.83387	0.05792	5.09323	0.19103		362.9	18	391.5	12	492	29	362.9	18
BRK14-1_43	1233.22	0.06156	0.974659	0.4815	3.63448	0.05855	4.52605	0.52974		366.8	16.5	399.3	12	657	21.5	366.8	16.5
BRK14-1_45	1211.11	0.05776	0.952216	0.4685	3.73533	0.05934	4.88709	0.37075		371.6	17.5	390	12	526	21	371.6	17.5
BRK14-1_7	136.25	0.0562	1.42349	0.465	3.87097	0.05958	4.86741	0.32952		373	17.5	389	12.5	442	30.5	373	17.5
BRK14-1_69	417.936	0.05558	1.07953	0.4651	3.76263	0.06002	4.91503	0.49621		375.7	18	387.8	12.5	431	24	375.7	18
BRK14-1_17	321.319	0.0539	1.2987	0.453	3.86313	0.06042	4.96524	0.29189		378.2	18.5	378.8	12.5	363	28.5	378.2	18.5
BRK14-1_54	405.008	0.0594	1.17845	0.5102	3.82203	0.06088	4.8456	0.22888		380.9	18	416.8	12.5	557	23.5	380.9	18
BRK14-1_70	387.318	0.0597	1.34003	0.521	3.93474	0.06141	5.12946	0.26819		384.2	19	425.5	13.5	580	29	384.2	19
BRK14-1_16	267.057	0.05449	1.10112	0.4692	3.83632	0.06214	4.90827	0.3424		388.6	18.5	390.4	12.5	382	25	388.6	18.5
BRK14-1_28	460.291	0.05476	1.00438	0.4741	3.6912	0.0622	4.74277	0.42236		388.9	18	393.6	12	400	22	388.9	18
BRK14-1_2	384.256	0.0621	1.85185	0.534	4.11985	0.06329	4.81909	0.23133		395.6	18.5	430	13.5	632	35	395.6	18.5
BRK14-1_10	745.548	0.05612	0.890948	0.4923	3.65631	0.06346	4.80618	0.56205		396.5	18.5	406.4	12.5	452	20	396.5	18.5
BRK14-1_11	129.276	0.0568	1.49648	0.496	3.83065	0.06418	4.75226	0.11922		400.9	18.5	408.6	13	463	31.5	400.9	18.5
BRK14-1_63	269.268	0.0557	1.25673	0.508	3.83858	0.06456	5.03408	0.24863		403.2	19.5	416.4	13	426	27.5	403.2	19.5
BRK14-1_41	570.175	0.05546	0.991706	0.4956	3.73285	0.06459	4.87692	0.22789		403.7	19	408.3	12.5	423	21.5	403.7	19
BRK14-1_3	453.827	0.0548	0.912409	0.4878	3.69004	0.06507	4.68726	0.5189		406.3	18.5	403.6	12.5	404	21.5	406.3	18.5
BRK14-1_26	586.845	0.05537	0.903016	0.5045	3.667	0.0651	4.7619	0.5026		406.5	19	414.6	12.5	424	21	406.5	19
BRK14-1_79	563.541	0.05391	1.02022	0.4817	3.84056	0.06534	4.82094	0.39655		408	19	398.9	12.5	363	22.5	408	19
BRK14-1_72	134.889	0.0547	1.27971	0.4897	3.77782	0.06549	4.80989	0.17772		409.5	19	403	12.5	381	27	409.5	19
BRK14-1_81	916.669	0.05922	0.92874	0.5224	3.63706	0.0656	4.64939	0.54658		409.6	18.5	426.5	13	576	21	409.6	18.5
BRK14-1_78	201.398	0.05499	1.18203	0.4965	3.72608	0.06604	4.76984	0.30995		412.5	19	408.9	13	405	26	412.5	19
BRK14-1_40	1219.62	0.05736	0.83682	0.5325	3.75587	0.06713	4.84135	0.7518		418.7	19.5	433.7	13.5	502	18.5	418.7	19.5
BRK14-1_5	263.995	0.05602	1.07105	0.5213	3.74065	0.06716	4.76474	#N/A		418.9	19.5	425.5	13	447	24.5	418.9	19.5
BRK14-1_21	1035.91	0.05558	0.836632	0.5104	3.72257	0.06736	4.75059	0.65229		420.2	19.5	418.5	12.5	437	19	420.2	19.5
BRK14-1_30	273.691	0.05565	1.16801	0.5166	3.77468	0.06743	4.89396	0.31452		420.6	20	422.2	13.5	429	25	420.6	20
BRK14-1_77	344.793	0.0554	1.26354	0.523	3.91969	0.06751	4.96223	0.070901		421.1	20	427.5	13.5	422	27.5	421.1	20
BRK14-1_86	180.306	0.0561	1.3369	0.532	3.85338	0.0689	4.86212	0.15383		430.3	20	431.4	13.5	432	28	430.3	20
BRK14-1_73	658.287	0.05617	0.97917	0.5394	3.80052	0.06949	4.96474	0.53123		433	20.5	438.2	13.5	455	22	433	20.5
BRK14-1_44	237.63	0.0604	1.3245	0.565	3.89381	0.0704	4.75852	0.069052		438.6	20.5	452.8	14	598	29	438.6	20.5
BRK14-1_38	481.383	0.05559	1.07933	0.5626	3.82154	0.07282	4.87503	0.29283		453.1	21.5	452.6	14	434	22.5	453.1	21.5
BRK14-1_52	666.282	0.05703	0.876732	0.5816	3.6967	0.07301	4.86235	0.26829		454.5	21.5	465.1	13.5	490	20	454.5	21.5
BRK14-1_36	515.573	0.05637	0.975696	0.5713	3.85087	0.07314	4.92207	0.40281		455	21.5	458.4	14	475	22	455	21.5
BRK14-1_6	336.458	0.059	1.18644	0.603	3.73134	0.07365	4.8201	0.57059		458	21.5	478.2	14.5	562	25	458	21.5
BRK14-1_57	373.54	0.05715	1.04987	0.5936	3.7062	0.07569	4.75624	0.19141		470.2	21.5	471.8	14	482	22	470.2	21.5
BRK14-1_25	115.498	0.0572	1.22378	0.609	3.69458	0.0767	4.7588	0.35408		476.3	22	481.8	14.5	493	26.5	476.3	22
BRK14-1_1	528.331	0.05744	0.870474	0.6709	3.65181	0.08626	4.69511	0.53049		533.3	24	521.2	15	506	19.5	506	19.5
BRK14-1_67	431.203	0.05888	0.934103	0.7488	3.67254	0.0905	4.86188	0.56543		558.4	26	566.9	16	565	19	565	19
BRK14-1_82	711.018	0.05901	0.847314	0.7731	3.68646	0.09774	4.65521	0.62665		601.1	27	581.2	16.5	567	19	567	19
BRK14-1_84	1096.97	0.05952	0.823253	0.7325	3.75427	0.08938	4.81092	0.61672		552.1	25.5	557.7	16	586	18	586	18
BRK14-1_93	225.553	0.05987	1.00217	0.813	3.69004	0.0992	4.78831	0.35952		609.6	28	603.7	17	598	21.5	598	21.5
BRK14-1_29	564.732	0.06014	0.914533	0.712	3.79213	0.0848	5.01179	0.49132		524.9	25	545.3	16	604	21	604	21
BRK14-1_61	434.095	0.06212	0.885383	0.8182	3.72769	0.09908	4.79411	0.40882		608.9	28	606.7	17	678	19	678	19
BRK14-1_74	178.095	0.06211	0.966028	0.955	3.76963	0.1125	4.88889	0.41051		686.9	31.5	680.3	18.5	682	21.5	682	21.5
BRK14-1_60	109.885	0.0638	1.25392	0.79	3.98734	0.0979	4.80082	0.72446		602	28	592	17.5	724	27	724	27
BRK14-1_19	248.856	0.06632	0.980097	0.967	3.72285	0.1061	4.71254	0.51266		650.1	30	686	18.5	811	21	811	21
BRK14-1_23	187.96	0.06682	1.04759	1.236	3.76214	0.1319	4.92798	0.33719		798.7	36.5	816.9	21.5	830	22	830	22
BRK14-1_62	1461.16	0.07046	0.851547	1.273	3.77062	0.1263	5.14648	0.6668		766.4	36.5	833.2	21	941	17.5	941	17.5
BRK14-1_13	44.7363	0.0708	1.27119	1.543	3.88853	0.16	5	0.51816		956	43.5	947	24	949	25.5	949	25.5
BRK14-1_75	231.846	0.07136	0.980942	1.618	3.70828	0.164	4.87805	0.43871		979	43.5	977.8	23.5	966	20	966	20
BRK14-1_4	329.824	0.0721	1.38696	1.718	3.78347	0.1631	5.21153	0.38848		974	46	1014	25.5	983	29	983	29
BRK14-1_80	51.8805	0.0739	1.42084	1.924	3.89813	0.1875	5.06667	0.45578		1107	50	1086	26	1026	28.5	1026	28.5
BRK14-1_24	355.509	0.07368	1.01792	1.731	3.75505	0.1641	4.87508	0.50584		979	45	1019.5	24	1035	19	1035	19
BRK14-1_47	294.783	0.07442	0.873421	1.816	3.5793	0.1831	4.64227	0.69622		1083.5	47	1051.5	24.5	1052	17.5	1052	17.5
BRK14-1_34	627.669	0.07454	0.804937	1.921	3.64394	0.1886	4.772	0.72707		1114.9	49	1087.9	25	1054	16.5	1054	16.5
BRK14-1_64	601.133	0.07737	0.904743	1.881	3.72142	0.1697	5.00884	0.46179		1011.9	45.5	1073.9	25	1128	17.5	1128	17.5
BRK14-1_56	87.6015	0.0778	1.09254	2.024	3.70553	0.1891	4.75939	0.61321		1115	50	1120	25.5	1147	22.5	1147	22.5
BRK14-1_91	73.3131	0.079	1.26582	1.972	3.80325	0.18	4.72222	0.48977		1066	47.5	1099	24	1150	24.5	1150	24.5
BRK14-1_14	172.481	0.0784	1.21173	2.048	3.90625	0.1861	5.10478	0.36303		1100	50	1130	26	1155	23	1155	23
BRK14-1_31	247.495	0.0785	0.89172	2.01	3.73134	0.1839	4.89396	0.44831		1088	49.5	1119	25.5	1157	18	1157	18
BRK14-1_87	108.354	0.07866	0.953471	2.406	3.74065	0.2182	4.8121	0.68113		1272	55	1244	26.5	1163	18.5	1163	18.5
BRK14-1_68	1229.82	0.07871	0.825816	1.751	3.71216	0.1581	5.06009	0.73623		945.7	43.5	1030.8	24	1165	16.5	1165	16.5
BRK14-1_9	952.56	0.08132	0.799311	2.222	3.60036	0.197	4.82234	0.80843		1158.8	50	1187.8	25.5	1230.1	15.5	1230.1	15.5
BRK14-1_12	286.789	0.0819	0.976801	2.569	3.50331	0.2298	4.56919	0.6996		1335	55	1291	27	1248	20	1248	20
BRK14-1_48	568.984	0.08507	0.822852	2.777	3.60101	0.2441	4.71118	0.67559		1408.6	60	1349	27.5	1315.6	15.5	1315.6	15.5
BRK14-1_15	277.603	0.0884	1.0181	2.971	3.87075	0.2334	5.14139	0.58874		1352	60	1399	28.5	1391	19	1391	19
BRK14-1_8	156.152	0.08918	0.897062	2.895	3.79965	0.2323	4.9505	0.70743		1346	60	1380	28	1404	17.5	1404	17.5
BRK14-1_83	125.023	0.0898	1.00223	3.123	3.84246	0.2571	4.86192	0.79166		1476	65	1439	29.5	1415	19	1415	19
BRK14-1_22	704.214	0.09102	0.823995	2.338	3.63559	0.1852	4.85961	0.91525		1095	49	1226	26	1446.8	15.5	1446.8	15.5
BRK14-1_37	269.098	0.09308	0.805758	3.508	3.70582	0.2756	4.8984	0.72137		1568	65	1528.2	29	1489	16	1489	16
BRK14-1_90	129.752	0.0931	0.912997	3.23	3.71517	0.2452	4.89396	0.56669		1414	60	1462.8	29	1491	17.5	1491	17.5
BRK14-1_20	81.4609	0.0933	0.96463	3.36	3.72024	0.2649	4.71876	0.60039		1514	65	1498	28.5	1493	18	1493	18
BRK14-1_71	439.538	0.09678	0.826617	3.32	3.76506	0.2528	4.94462	0.8393		1453	65	1488	30.5	1562	15.5	1562	15.5
BRK14-1_53	83.0088	0.1002	1.0978	3.956	3.9181	0.2751	5.08906	0.66762		1566	70	1628	32	1628	20.5	1628	20.5
BRK14-1_46	141.183	0.10194	0.833824	4.202	3.68872	0.3087	4.69712	0.54738		1735	70	1674.8	30.5	1661	16	1661	16
BRK14-1_27	227.424	0.1037	1.01254	3.218	3.57365	0.2255	4.65632	0.7178		1310	55	1465	27	1693	19.5	1693	19.5
BRK14-1_55	898.128	0.1065	1.03286	4.236	3.65911	0.2816	4.79403	0.69084		1598	70	1678	29.5	1736	18	1736	18
BRK14-1_42	248.516	0.10787	0.834338	4.752	3.68266	0.3235	4.79134	0.6468		1808	75	1776	32	1763.6	15	1763.6	15
BRK14-1_18	186.77	0.11022	0.816549	4.788	3.7594	0.32	4.84375	0.78059		1792	75	1782.2	31.5	1802	15.5	1802	15.5
BRK14-1_76	237.63	0.11376	0.835091	5.3	3.77358	0.3306	4.99093	0.69774		1841	80	1869.2	32	1862	15.5	1862	15.5
BRK14-1_39	332.035	0.1144	0.786713	5.759	3.73329	0.3648	4.79715	0.77699		2004	85	1940.5	32	1870.5	14.5	1870.5	14.5
BRK14-1_49	579.02	0.12015	0.790678	5.068	3.5517	0.3165	4.58136	0.8104		1772	70	1830.1	31.5	1957.8	14.5	1957.8	14.5
BRK14-1_88	270.459	0.12246	0.816593	5.59	3.66726	0.3266	4.74587	0.90799		1824	75	1912	32.5	1994.6	14.5	1994.6	14.5
BRK14-1_92	172.141	0.1269	0.827423	6.466	3.6344	0.3693	4.73869	0.67405		2025	85	2042.2	32.5	2054	14.5	2054	14.5
BRK14-1_51	215.347	0.1323	0.869237	6.296	3.65311	0.3496	4.71968	0.66985		1932	80	2018.1	33	2127	15.5	2127	15.5
BRK14-1_89	273.521	0.1679	0.83383	9.952	3.61736	0.4311	4.63929	0.79521		2310	90	2431.2	34	2535	14	2535	14
BRK14-1_50	180.646	0.17336	0.807568	12.87	3.6519	0.5438	4.78117	0.85985		2797	110	2669.2	36.5	2589.8	13.5	2589.8	13.5
BRK14-1_85	189.661	0.17483	0.800778	10.7	3.73832	0.4187	5.13494	0.7882		2253	95	2496	35	2604.6	14	2604.6	14
BRK14-1_33	296.144	0.17946	0.807979	13.04	3.71933	0.5315	4.79774	0.90073		2747	110	2681.3	35	2647.5	13.5	2647.5	13.5
BRK14-2_Type 1
					Isotopic Ratios							Apparent Ages
Analysis	U	207Pb*	±	207Pb*	±	206Pb*	±	error		206Pb*	±	207Pb*	±	206Pb*	±	Best	±
	(ppm)	206Pb*	(%)	235U	(%)	238U	(%)	corr.		238U	Ma	235U	Ma	207Pb*	Ma	Age†	Ma††
BRK14-2_91	241.882	0.0619	1.61551	0.2273	3.95952	0.02599	4.80954	0.0025		165.4	8	208.8	7.5	650	35	165.4	8
BRK14-2_74	131.317	0.0514	1.75097	0.2207	3.85138	0.02953	4.91026	0.10683		187.6	9	202.6	7	280	36	187.6	9
BRK14-2_4	152.41	0.0501	1.59681	0.2201	3.86188	0.03152	4.91751	0.14746		200	9.5	201.8	7	184	32	200	9.5
BRK14-2_50	142.544	0.0516	1.64729	0.2266	3.7511	0.03255	4.60829	0.19558		206.5	9.5	207.2	7	267	34	206.5	9.5
BRK14-2_30	82.8387	0.0496	2.01613	0.2263	4.19797	0.03344	4.78469	0.59338		212.5	10	205.8	8	192	41	212.5	10
BRK14-2_71	1928.93	0.05656	0.884017	0.4051	3.70279	0.05203	4.70882	0.37509		327	15	345.7	11	472	20.5	327	15
BRK14-2_22	201.739	0.05368	1.11773	0.3953	3.79459	0.05328	4.78604	0.30701		334.5	15.5	337.4	11	358	26	334.5	15.5
BRK14-2_39	203.269	0.05396	1.2046	0.4262	3.75411	0.05589	4.74146	0.62001		350.5	16.5	360	11.5	360	26	350.5	16.5
BRK14-2_60	1030.81	0.0613	1.63132	0.483	4.14079	0.05638	4.87762	0.76523		353.6	17	398	13	615	31	353.6	17
BRK14-2_42	498.393	0.0595	1.34454	0.463	3.88769	0.05654	4.86381	0.41002		354.8	16.5	384.2	12	561	27.5	354.8	16.5
BRK14-2_45	272.84	0.05411	1.10885	0.4277	3.62404	0.05767	4.68181	0.60246		361.4	16.5	361.2	11.5	370	24	361.4	16.5
BRK14-2_77	1195.8	0.05525	0.841629	0.4637	3.66616	0.05988	4.92652	0.3344		374.9	18	386.8	12	422	19.5	374.9	18
BRK14-2_61	327.613	0.05549	1.08128	0.4659	3.75617	0.06007	4.74446	0.24108		376	17.5	388.2	12	423	24	376	17.5
BRK14-2_15	257.191	0.0543	1.38122	0.471	3.82166	0.06137	4.88838	0.59179		383.9	18	390.9	12.5	382	29.5	383.9	18
BRK14-2_82	1158.38	0.05573	0.897183	0.4765	3.77754	0.06216	4.90669	0.56469		388.7	18.5	395.9	12.5	447	20	388.7	18.5
BRK14-2_94	741.636	0.05642	0.886211	0.4832	3.72517	0.06245	4.88391	0.39938		390.5	18.5	399.9	12.5	467	20.5	390.5	18.5
BRK14-2_19	821.583	0.05552	0.900576	0.4852	3.70981	0.06298	4.9222	0.44904		393.7	18.5	401.4	12.5	429	20.5	393.7	18.5
BRK14-2_78	562.01	0.05785	0.950735	0.5038	3.77134	0.06324	4.74383	0.33515		395.3	18	414.4	13	525	21	395.3	18
BRK14-2_92	240.181	0.05478	1.09529	0.4864	3.80345	0.06392	4.77159	0.19883		399.4	18.5	401.8	12.5	394	24.5	399.4	18.5
BRK14-2_37	230.826	0.0548	1.09489	0.4871	3.79799	0.06421	4.82791	0.31581		401.2	18.5	402.6	12.5	405	25.5	401.2	18.5
BRK14-2_44	114.307	0.0551	1.36116	0.487	3.79877	0.06457	4.72356	0.43829		403.3	18.5	402.1	12.5	408	30	403.3	18.5
BRK14-2_58	333.566	0.05629	1.15473	0.5042	3.86751	0.06484	4.85811	0.6093		405	19	413.8	13	463	25	405	19
BRK14-2_27	690.606	0.05545	0.901713	0.4905	3.77166	0.06519	4.83203	0.50203		407.1	19	404.9	12.5	430	20	407.1	19
BRK14-2_49	668.323	0.05598	0.875313	0.4979	3.61518	0.06553	4.50175	0.10059		409.4	18	411	12	449	19.5	409.4	18
BRK14-2_89	130.977	0.0559	1.25224	0.529	3.78072	0.06624	4.83092	0.32967		413.4	19.5	430.8	13	439	27.5	413.4	19.5
BRK14-2_20	472.538	0.05587	0.984428	0.5139	3.79451	0.06668	4.94901	0.47371		416.1	20	421.5	13	445	22	416.1	20
BRK14-2_55	187.45	0.0622	1.60772	0.576	3.90625	0.06705	4.84713	0.38376		418.2	19.5	458	14.5	646	33.5	418.2	19.5
BRK14-2_46	161.425	0.0554	1.35379	0.514	3.89105	0.0674	4.74777	0.13874		420.5	19.5	421.8	13.5	413	31	420.5	19.5
BRK14-2_76	72.6327	0.0552	1.53986	0.529	3.87524	0.06739	4.89687	0.26138		420.7	19.5	431.8	13.5	418	32.5	420.7	19.5
BRK14-2_24	151.559	0.05492	1.18354	0.5056	3.75791	0.06755	4.81125	0.39062		421.4	19.5	415.1	12.5	394	26	421.4	19.5
BRK14-2_52	246.645	0.05484	1.09409	0.5059	3.65685	0.06779	4.72046	0.15719		422.7	19.5	415.8	12.5	402	24	422.7	19.5
BRK14-2_63	150.538	0.0551	1.17967	0.5195	3.75361	0.06778	4.79492	0.51105		423	19.5	424.3	13	411	26.5	423	19.5
BRK14-2_96	722.925	0.05646	0.974141	0.5234	3.82117	0.06787	5.00958	0.23738		423.2	20.5	427.1	13	473	21	423.2	20.5
BRK14-2_69	102.91	0.0557	1.3465	0.531	3.76648	0.06922	4.76741	0.166		431.3	20	431.9	13.5	419	29.5	431.3	20
BRK14-2_93	152.75	0.056	1.42857	0.524	3.72137	0.06937	4.61295	0.55999		432.3	19.5	427.3	13	450	31	432.3	19.5
BRK14-2_54	529.011	0.0623	1.1236	0.58	3.7069	0.06947	4.75025	0.54102		432.9	20	463.5	14	684	23.5	432.9	20
BRK14-2_53	477.981	0.05445	0.918274	0.5127	3.70587	0.06961	4.7407	0.38514		433.7	20	419.7	12.5	389	21	433.7	20
BRK14-2_79	389.019	0.05494	1.00109	0.5292	3.77929	0.07128	4.84007	0.31864		443.8	20.5	430.7	13	404	22	443.8	20.5
BRK14-2_5	364.694	0.05566	0.988142	0.5424	3.7795	0.07131	4.83803	0.38546		444	20.5	439.8	13.5	431	22	444	20.5
BRK14-2_8	526.8	0.05571	0.987255	0.5349	3.73902	0.07214	4.92099	0.22103		449	21.5	435.3	13.5	436	22	449	21.5
BRK14-2_32	104.884	0.0587	1.36286	0.565	3.89381	0.07236	4.76783	0.44072		450.6	21	453.7	14	540	30.5	450.6	21
BRK14-2_13	401.266	0.05644	0.974486	0.5494	3.73134	0.07362	4.61831	0.48689		457.9	20.5	445.3	13.5	464	20.5	457.9	20.5
BRK14-2_3	290.361	0.0569	0.966608	0.6134	3.74959	0.07775	4.82315	0.48572		482.6	22.5	485.4	14	488	21.5	488	21.5
BRK14-2_40	266.717	0.0628	1.11465	0.718	3.76045	0.08145	4.91099	0.46357		505.1	23.5	549.6	16	697	24	505.1	23.5
BRK14-2_86	491.589	0.05903	0.93173	0.7356	3.67047	0.08951	4.74807	0.28213		552.6	25	559.2	16	567	20	552.6	25
BRK14-2_14	139.822	0.0591	1.18443	0.721	3.7448	0.09046	4.58766	0.23418		558.1	24.5	550.5	15.5	563	25.5	558.1	24.5
BRK14-2_18	647.911	0.05907	0.846453	0.7041	3.69266	0.08671	4.67074	0.53296		536	24	541.1	15.5	568	19.5	568	19.5
BRK14-2_28	137.951	0.0594	1.17845	0.737	3.79919	0.09111	4.82933	0.59072		561.9	26	560.8	16.5	582	25	582	25
BRK14-2_41	494.14	0.06018	0.913925	0.7909	3.72993	0.0947	4.85744	0.60958		583.2	27	591.4	16.5	614	19.5	614	19.5
BRK14-2_62	147.136	0.06223	1.04451	0.961	3.79813	0.1112	4.94604	0.50579		679.3	31	682.1	18.5	676	22.5	676	22.5
BRK14-2_72	644.679	0.06967	0.861203	0.9577	3.65459	0.09617	4.7832	0.43744		591.9	27	681.5	18.5	916	18	916	18
BRK14-2_67	189.321	0.07044	0.922771	1.519	3.6208	0.16	4.6875	0.66236		956.6	42.5	937.8	22.5	941	18.5	941	18.5
BRK14-2_11	295.974	0.07101	0.844951	1.579	3.79987	0.17	4.70588	0.44174		1012	44	961.9	23	957	18	957	18
BRK14-2_2	106.142	0.07107	0.984944	1.614	3.71747	0.1644	4.86618	0.63035		980.7	43.5	976.1	23.5	960	20.5	960	20.5
BRK14-2_56	487.677	0.07702	0.843937	1.735	3.7464	0.1633	4.89896	0.46916		975.8	44	1021.1	24	1120	17	1120	17
BRK14-2_33	172.651	0.07794	0.898127	2.134	3.74883	0.2069	4.83325	0.787		1212	55	1159.9	25.5	1145	17.5	1145	17.5
BRK14-2_7	596.711	0.08204	0.853242	2.265	3.75276	0.2111	4.73709	0.54446		1234	55	1201.5	26	1245	16.5	1245	16.5
BRK14-2_21	159.894	0.08607	0.929476	2.338	3.63559	0.2024	4.69368	0.62087		1189	50	1222.9	26	1339	18.5	1339	18.5
BRK14-2_66	316.726	0.08837	0.792124	2.887	3.63699	0.2411	4.76981	0.48137		1392.6	60	1378.6	28	1392	15.5	1392	15.5
BRK14-2_23	203.61	0.08912	0.841562	2.814	3.73134	0.2311	4.75984	0.3703		1340.6	60	1358.1	28	1407	16	1407	16
BRK14-2_87	99.3384	0.0906	1.04857	2.651	3.77216	0.2085	4.79616	0.46546		1221	55	1314	28	1431	19.5	1431	19.5
BRK14-2_29	134.719	0.09307	0.913291	3.305	3.78215	0.2586	4.83372	0.63369		1482	65	1481.7	29	1485	17.5	1485	17.5
BRK14-2_16	131.827	0.10098	0.841751	3.899	3.59066	0.2819	4.61156	0.5875		1600	65	1612.7	29.5	1642	16	1642	16
BRK14-2_88	212.965	0.10142	0.838099	3.89	3.72751	0.2716	4.78645	0.53746		1548	65	1611.1	29.5	1649	16	1649	16
BRK14-2_26	97.042	0.10151	0.886612	3.995	3.62954	0.2886	4.851	0.64458		1635	70	1633.3	30.5	1650	16.5	1650	16.5
BRK14-2_47	77.3955	0.10204	0.882007	4.148	3.6162	0.304	4.44079	0.70457		1711	70	1662	30.5	1661	16.5	1661	16.5
BRK14-2_65	195.615	0.10259	0.828541	4.013	3.73785	0.2907	4.81596	0.6124		1646	70	1636.5	30	1670	15.5	1670	15.5
BRK14-2_84	220.62	0.10879	0.827282	4.837	3.72131	0.3225	4.8062	0.61716		1801	75	1791.3	32	1779	15	1779	15
BRK14-2_68	76.3239	0.1113	0.898473	5.095	3.72915	0.3373	4.74355	0.71911		1872	75	1836	31	1820	16	1820	16
BRK14-2_80	281.515	0.11233	0.801211	5.379	3.71816	0.3539	4.80362	0.6198		1953	80	1882	31.5	1837.5	15	1837.5	15
BRK14-2_81	201.398	0.11273	0.842722	5.27	3.70019	0.3455	4.77569	0.5912		1912	80	1863.4	31.5	1844	15	1844	15
BRK14-2_90	48.2063	0.113	0.929204	4.882	3.68701	0.3071	4.8844	0.66857		1725	75	1798	31	1844	16.5	1844	16.5
BRK14-2_57	460.461	0.11277	0.798085	4.915	3.66226	0.3161	4.90351	0.5316		1770	75	1804	30	1844.6	15	1844.6	15
BRK14-2_31	65.8117	0.1131	0.884173	5.217	3.73778	0.3475	4.7482	0.82567		1923	80	1854	31.5	1846	16.5	1846	16.5
BRK14-2_6	279.134	0.11325	0.794702	4.514	3.76606	0.2956	4.90528	0.58761		1668	70	1733.8	29.5	1853	14.5	1853	14.5
BRK14-2_17	27.9134	0.1154	1.03986	5.213	3.74065	0.3275	4.73282	0.67574		1828	75	1856	31.5	1881	18.5	1881	18.5
BRK14-2_38	170.95	0.1157	0.821089	4.622	3.67806	0.2878	4.69076	0.49264		1632	70	1752.8	31	1891	15	1891	15
BRK14-2_83	71.9013	0.1165	0.901288	5.578	3.76479	0.3503	4.85298	0.74771		1936	80	1911.3	32	1902	16	1902	16
BRK14-2_73	111.245	0.11676	0.813635	5.55	3.69369	0.3308	4.83676	0.63002		1841	80	1907.7	32	1906	15	1906	15
BRK14-2_43	87.1422	0.11717	0.853461	5.284	3.69039	0.3304	4.84262	0.56202		1840	75	1865.2	31.5	1911	15.5	1911	15.5
BRK14-2_12	92.0241	0.11726	0.852806	5.695	3.68745	0.3685	4.74898	0.78479		2022	85	1929.4	31	1912	15.5	1912	15.5
BRK14-2_70	190.852	0.11864	0.800742	5.681	3.69653	0.346	4.76879	0.43962		1915	80	1929.5	32	1934	15	1934	15
BRK14-2_51	49.4991	0.1219	0.943396	6.112	3.59948	0.3691	4.6058	0.64264		2025	80	1991	32.5	1983	17	1983	17
BRK14-2_64	115.328	0.1229	0.854353	6.079	3.70127	0.3609	4.71045	0.60944		1987	80	1985.6	32	1996	15	1996	15
BRK14-2_9	32.8803	0.1257	1.03421	6.35	3.85827	0.3837	4.95179	0.56312		2091	90	2022	33.5	2045	18	2045	18
BRK14-2_36	58.6165	0.1276	0.901254	6.608	3.63196	0.3809	4.85692	0.52855		2081	85	2060	32	2062	16	2062	16
BRK14-2_25	242.222	0.1302	0.921659	5.733	3.75022	0.3087	5.18303	0.3589		1734	75	1935	32.5	2099	16	2099	16
BRK14-2_95	90.4932	0.1366	0.878477	7.249	3.72465	0.3926	4.83953	0.78615		2135	85	2143.4	33.5	2185	15	2185	15
BRK14-2_85	118.9	0.1543	0.842515	8.76	3.71005	0.4137	4.71356	0.80267		2230	90	2315	33	2393	14.5	2393	14.5
BRK14-2_59	67.8699	0.1599	0.844278	10.35	3.71981	0.4671	4.81696	0.68467		2470	100	2468	34.5	2456	14	2456	14
BRK14-2_75	112.096	0.16621	0.812225	10.892	3.67242	0.4574	4.80979	0.78986		2428	95	2514.1	35	2520.5	14	2520.5	14
BRK14-2_48	134.889	0.17259	0.811171	11.69	3.59281	0.5068	4.43962	0.72277		2642	100	2578.5	34.5	2582.6	14	2582.6	14
BRK14-2_34	134.719	0.18334	0.79088	13.478	3.70975	0.553	4.79204	-0.19024		2836	110	2713.1	35	2684.1	13.5	2684.1	13.5
BRHR14-1A_Type 2
					Isotopic Ratios							Apparent Ages
Analysis	U	207Pb*	±	207Pb*	±	206Pb*	±	error		206Pb*	±	207Pb*	±	206Pb*	±	Best	±
	(ppm)	206Pb*	(%)	235U	(%)	238U	(%)	corr.		238U	Ma	235U	Ma	207Pb*	Ma	Age†	Ma
BRHR14_1A_89	389.529	0.053	4.90566	0.121	4.00826	0.01627	3.38045	0.18762		104	3.65	115.8	4.45	311	50	104	3.65
BRHR14_1A_88	680.4	0.0525	4.38095	0.1219	3.93765	0.01677	3.57782	0.18811		107.2	3.7	116.6	4.3	292	43.5	107.2	3.7
BRHR14_1A_71	436.306	0.0549	4.91803	0.1295	4.2471	0.01699	3.53149	0.3747		108.6	3.75	123.3	4.8	377	50	108.6	3.75
BRHR14_1A_54	247.836	0.0517	6.18956	0.1207	4.971	0.01703	3.81679	0.20309		108.9	4.05	115.3	5.5	240	60	108.9	4.05
BRHR14_1A_31	892.004	0.0556	5.03597	0.1332	4.12913	0.01714	3.50058	0.041766		109.6	3.7	126.6	4.85	385	50	109.6	3.7
BRHR14_1A_26	644.679	0.0494	4.45344	0.1201	3.95504	0.01729	3.47021	0.023877		110.5	3.85	114.9	4.3	161	45	110.5	3.85
BRHR14_1A_83	553.335	0.0498	4.41767	0.1166	3.85935	0.01742	3.44432	0.075451		111.4	3.75	111.8	4.1	183	44.5	111.4	3.75
BRHR14_1A_81	223.341	0.0562	6.40569	0.1319	4.5489	0.0175	3.42857	0.069713		111.8	3.85	125.9	5.5	430	65	111.8	3.85
BRHR14_1A_19	748.44	0.0529	3.78072	0.1274	3.80691	0.01751	3.42661	0.14867		111.9	3.75	121.6	4.35	312	42	111.9	3.75
BRHR14_1A_40	530.712	0.0502	4.58167	0.1226	3.91517	0.01752	3.42466	0.062875		112	3.8	117.2	4.3	189	44	112	3.8
BRHR14_1A_61	894.726	0.0592	3.71622	0.1403	3.56379	0.0177	3.38983	0.48166		113.1	3.7	133.1	4.65	579	40.5	113.1	3.7
BRHR14_1A_18	704.214	0.0526	3.9924	0.1262	3.84311	0.0178	4.21348	0.095345		113.7	4.6	120.5	4.35	299	44	113.7	4.6
BRHR14_1A_55	461.141	0.049	4.4898	0.1168	3.85274	0.01782	3.367	0.14481		113.9	3.85	112	4.15	153	46	113.9	3.85
BRHR14_1A_39	191.362	0.0524	5.72519	0.1277	4.30697	0.01798	3.61513	0.35291		114.9	4	121.6	5	280	60	114.9	4
BRHR14_1A_47	1566.62	0.0533	5.06567	0.1332	4.12913	0.01799	3.33519	0.4474		115	3.9	126.6	5	299	47	115	3.9
BRHR14_1A_32	512.171	0.0564	5.31915	0.1423	4.21644	0.01813	3.58522	0.053006		115.8	4.05	134.5	5.5	431	55	115.8	4.05
BRHR14_1A_15	1035.91	0.0512	3.90625	0.1268	3.82492	0.01821	3.29489	0.46433		116.3	3.95	121.1	4.4	236	40.5	116.3	3.95
BRHR14_1A_51	406.709	0.0496	5.44355	0.1235	4.04858	0.01837	3.26619	0.18716		117.3	3.95	118.5	4.65	154	50	117.3	3.95
BRHR14_1A_70	273.01	0.052	4.61538	0.2041	4.16463	0.02851	3.50754	0.32477		181.2	6.5	187.9	7	279	47	181.2	6.5
BRHR14_1A_27	225.893	0.0514	4.28016	0.2486	3.8214	0.03431	3.49752	0.24205		217.5	7.5	225.7	7.5	253	44	217.5	7.5
BRHR14_1A_33	541.939	0.0576	3.47222	0.452	3.65044	0.05656	3.35926	0.018687		354.7	11.5	378.2	11.5	495	37.5	354.7	11.5
BRHR14_1A_57	418.446	0.0644	3.41615	0.617	3.64668	0.0721	3.32871	0.31847		448.9	14.5	489.3	14	753	35.5	448.9	14.5
BRHR14_1A_9	216.027	0.0632	4.43038	0.724	4.07459	0.0845	3.5503	0.36539		524	18.5	552	16.5	716	45.5	524	18.5
BRHR14_1A_58	379.833	0.0676	3.84615	0.811	3.69914	0.0889	3.31834	0.16579		548.6	17.5	604	16.5	845	39.5	548.6	17.5
BRHR14_1A_93	121.792	0.083	3.13253	2.487	3.61882	0.2151	3.48675	0.56486		1255	39.5	1266	26.5	1278	30	1278	30
BRHR14_1A_37	619.164	0.09038	2.7661	3.137	3.66592	0.2518	3.37569	0.74973		1448	44.5	1441	27.5	1436	26	1436	26
BRHR14_1A_25	1442.79	0.09116	2.63273	2.28	3.72807	0.1798	3.61513	0.79659		1065	35	1207	26	1451	25.5	1451	25.5
BRHR14_1A_4	125.364	0.0933	2.89389	3.353	3.728	0.2636	3.41426	0.69089		1508	45	1499	27.5	1492	27.5	1492	27.5
BRHR14_1A_87	534.114	0.09591	2.71087	3.462	3.61063	0.2603	3.45755	0.83542		1491	45.5	1519	29	1546	25.5	1546	25.5
BRHR14_1A_24	57.1536	0.0989	3.3367	3.415	3.66032	0.2531	3.55591	0.70904		1453	45	1509	29	1603	30.5	1603	30.5
BRHR14_1A_16	252.428	0.1037	3.85728	3.292	3.79708	0.233	3.43348	0.55969		1350	41.5	1475	29	1679	32	1679	32
BRHR14_1A_53	787.563	0.1103	6.25567	4.192	9.18416	0.2784	5.02874	0.87616		1582	65	1671	49	1807	42.5	1807	42.5
BRHR14_1A_23	138.291	0.1132	2.91519	4.82	3.63071	0.311	3.53698	0.85873		1743	55	1788	32.5	1847	26.5	1847	26.5
BRHR14_1A_92	144.245	0.1136	2.8169	5.207	3.64893	0.3286	3.4997	0.70263		1831	55	1852	31	1854	26	1854	26
BRHR14_1A_38	99.1683	0.1171	2.9889	5.563	3.5053	0.3464	3.4642	0.71116		1916	55	1911	32	1915	25.5	1915	25.5
BRHR14_1A_11	505.537	0.1259	2.70056	4.329	3.465	0.2496	3.40545	0.81488		1436	43.5	1698	30	2042	24	2042	24
BRHR14_1A_85	208.202	0.1733	2.71206	11.71	3.54398	0.4928	3.34821	0.88656		2582	70	2581	34.5	2591	21.5	2591	21.5
BRHR14_1A_95	116.008	0.1758	2.78726	11.93	3.64627	0.4981	3.41297	0.79902		2604	75	2600	33.5	2612	23.5	2612	23.5
BRHR14_1A_94	255.15	0.1827	2.68199	11.72	3.62628	0.4637	3.45051	0.8965		2454	70	2580	34	2676	22.5	2676	22.5
BRHR14_1A_8	104.101	0.1946	2.82631	14.14	3.53607	0.527	3.41556	0.90299		2731	80	2753	39.5	2779	24	2779	24
BRHR14_1A_44	375.751	0.2791	2.72304	19.59	3.57325	0.503	3.47913	0.89026		2629	70	3065	36.5	3354	22.5	3354	22.5
BRK14-9_Type 2
					Isotopic Ratios							Apparent Ages
Analysis	U	207Pb*	±	207Pb*	±	206Pb*	±	error		206Pb*	±	207Pb*	±	206Pb*	±	Best	±
	(ppm)	206Pb*	(%)	235U	(%)	238U	(%)	corr.		238U	Ma	235U	Ma	207Pb*	Ma	Age†	Ma††
BRK14_9_10	2810.05	0.0576	1.38889	0.2543	5.30869	0.03182	5.34255	0.67953		201.9	10.5	229.9	10	511	30.5	201.9	10.5
BRK14_9_51	649.272	0.0574	1.56794	0.4392	3.64299	0.05545	3.33634	0.45264		347.8	11	369.1	11	498	34	347.8	11
BRK14_9_1	285.598	0.0572	1.74825	0.445	3.70787	0.05593	3.4865	0.31612		350.7	12	374	11.5	485	40	350.7	12
BRK14_9_41	822.093	0.0571	1.66375	0.447	3.57942	0.05597	3.39468	0.50246		351	11.5	375	11	492	36	351	11.5
BRK14_9_44	949.158	0.0627	1.83413	0.49	3.67347	0.05612	3.3856	0.29838		352	11.5	403.8	12.5	672	36	352	11.5
BRK14_9_37	821.583	0.0563	1.86501	0.453	3.64238	0.05783	3.37195	0.13546		362.4	12	379	11.5	455	37.5	362.4	12
BRK14_9_62	825.835	0.056	1.60714	0.455	3.51648	0.05798	3.44947	0.088783		363.3	12	381	11.5	444	34.5	363.3	12
BRK14_9_84	224.022	0.0574	2.35192	0.477	3.98323	0.05898	3.47575	0.068989		369.4	12.5	394	12.5	495	50	369.4	12.5
BRK14_9_9	2243.62	0.05427	1.38198	0.4457	3.47768	0.05945	3.28007	0.61872		372.2	12	374.1	11	380	32.5	372.2	12
BRK14_9_7	515.403	0.05423	1.5674	0.4462	3.58584	0.06008	3.32889	0.29346		376.1	12	374.9	11.5	372	36	376.1	12
BRK14_9_72	412.492	0.05683	1.58367	0.5015	3.58923	0.0624	3.44551	0.41746		390.2	13	412.9	12	487	35.5	390.2	13
BRK14_9_81	1270.65	0.05503	1.45375	0.4763	3.56918	0.06279	3.34448	0.64333		392.5	13	395.1	12	416	33	392.5	13
BRK14_9_77	500.944	0.0681	1.68869	0.592	3.63176	0.063	3.4127	0.36979		393.9	13	471.3	13.5	872	35	393.9	13
BRK14_9_4	592.628	0.0562	1.60142	0.501	3.59281	0.06466	3.32509	0.4909		403.9	13	412	12	449	36	403.9	13
BRK14_9_20	962.766	0.064	1.5625	0.588	3.57143	0.06622	3.32226	0.531		413.3	13.5	468.7	13.5	735	32.5	413.3	13.5
BRK14_9_14	896.427	0.0554	1.5343	0.5362	3.54345	0.06871	3.3474	0.44196		428.3	14	435.4	12.5	415	31.5	428.3	14
BRK14_9_27	285.258	0.0633	2.1327	0.609	3.94089	0.0689	3.48331	0.41648		429.2	14.5	482	14.5	707	44.5	429.2	14.5
BRK14_9_40	667.472	0.0589	1.52801	0.568	3.60915	0.06922	3.39497	0.53783		431.4	14	457	13.5	577	32	431.4	14
BRK14_9_59	399.565	0.0551	1.63339	0.538	3.62454	0.06932	3.39008	0.47952		432	14	437	13	417	37	432	14
BRK14_9_75	120.941	0.0565	2.21239	0.545	4.0367	0.07	3.42857	0.49341		436.2	14.5	441	14.5	455	48.5	436.2	14.5
BRK14_9_89	95.4261	0.0614	2.76873	0.639	4.38185	0.074	3.58108	0.19922		459.9	15	496	17	590	60	459.9	15
BRK14_9_82	172.311	0.059	1.86441	0.735	3.80952	0.0916	3.38428	0.40235		564.6	18.5	562	16	565	40	564.6	18.5
BRK14_9_48	214.326	0.0642	1.63551	1.005	3.63184	0.1153	3.38248	0.6961		703	22.5	705	18.5	740	34	703	22.5
BRK14_9_54	3247.21	0.0742	1.41509	1.183	3.63483	0.1154	3.4662	0.90222		705	23	792	20	1048	27.5	705	23
BRK14_9_90	118.56	0.0771	1.62127	1.903	3.6784	0.1778	3.37458	0.55276		1055	34	1079	25	1119	33	1119	33
BRK14_9_56	435.456	0.07813	1.40791	2.091	3.5868	0.1928	3.37137	0.68731		1136	35	1147	24.5	1154	28.5	1154	28.5
BRK14_9_61	729.729	0.0809	1.48331	2.096	3.57824	0.1849	3.51541	0.84553		1097	34.5	1146	25	1219	28.5	1219	28.5
BRK14_9_31	311.623	0.0818	1.89487	1.511	3.63997	0.1329	3.23552	0.77165		804	25	933	21.5	1235	34	1235	34
BRK14_9_50	1061.42	0.0831	1.38387	1.676	3.87828	0.1475	3.72881	0.055008		887	29.5	998	23.5	1268	27.5	1268	27.5
BRK14_9_35	750.141	0.0913	1.64294	2.899	3.44947	0.2248	3.3363	-0.010058		1307	40	1380	30.5	1473	18.5	1473	18.5
BRK14_9_58	739.935	0.09344	1.33776	3.052	3.44037	0.236	3.38983	0.79023		1365	41	1419.6	27	1497	26	1497	26
BRK14_9_21	137.441	0.0939	1.5442	3.38	3.5503	0.261	3.44828	-0.091531		1494	45	1504	28	1502	29.5	1502	29.5
BRK14_9_26	253.959	0.0952	1.47059	2.954	3.5545	0.2239	3.34971	0.71748		1301	40.5	1392	27	1526	27.5	1526	27.5
BRK14_9_68	381.704	0.0951	1.41956	3.101	3.386	0.2274	3.29815	0.79288		1322	41	1432	29.5	1530	26	1530	26
BRK14_9_66	492.439	0.10086	1.38806	4.073	3.56003	0.2795	3.39893	0.80788		1590	48.5	1650	29	1643	26	1643	26
BRK14_9_45	498.903	0.1096	1.36861	3.709	3.37018	0.2457	3.256	0.80949		1416	42.5	1572	28.5	1794	24.5	1794	24.5
BRK14_9_80	121.451	0.1105	1.44796	4.771	3.66799	0.3216	3.4204	0.73736		1796	55	1785	32	1805	27	1805	27
BRK14_9_83	123.833	0.111	1.48649	4.296	3.60801	0.2757	3.44577	0.73531		1571	48.5	1691	30.5	1814	26.5	1814	26.5
BRK14_9_55	190.342	0.1119	1.42985	4.914	3.56125	0.3162	3.32068	0.75744		1772	50	1806	30	1829	25.5	1829	25.5
BRK14_9_11	108.371	0.1124	1.42349	5.009	3.49371	0.3201	3.43643	0.61003		1789	55	1821	30.5	1840	26.5	1840	26.5
BRK14_9_73	175.543	0.1126	1.46536	4.768	3.56544	0.302	3.47682	0.77271		1700	50	1778	33.5	1841	26.5	1841	26.5
BRK14_9_64	225.382	0.1127	1.46406	4.883	3.58386	0.3011	3.48721	0.28173		1696	50	1797	30	1846	23.5	1846	23.5
BRK14_9_2	1323.38	0.1133	1.36805	4.332	3.69344	0.2755	3.44828	0.87348		1576	48.5	1702	30.5	1851	24.5	1851	24.5
BRK14_9_13	151.049	0.1136	1.54049	4.53	3.53201	0.2856	3.32633	0.66312		1624	49	1735	31.5	1862	28	1862	28
BRK14_9_69	441.58	0.11458	1.3964	4.889	3.37492	0.2972	3.36474	0.80432		1677	50	1801	31.5	1872	24.5	1872	24.5
BRK14_9_5	615.762	0.1164	1.54639	4.924	3.75711	0.3062	3.42913	0.72604		1721	50	1804	31.5	1904	27	1904	27
BRK14_9_22	183.708	0.1172	1.45051	5.28	3.50379	0.3202	3.43535	0.69107		1790	55	1864	39	1913	25.5	1913	25.5
BRK14_9_29	224.532	0.1184	1.47804	5.067	3.5524	0.3088	3.40026	0.5798		1737	50	1829	31.5	1927	26.5	1927	26.5
BRK14_9_6	113.967	0.1188	1.51515	5.08	3.54331	0.3096	3.39147	0.51081		1737	50	1836	31	1938	27.5	1938	27.5
BRK14_9_46	204.97	0.12	1.41667	6.089	3.53096	0.366	3.27869	0.22263		2010	60	1986	31	1952	25.5	1952	25.5
BRK14_9_91	86.2577	0.1198	1.41903	5.468	3.65764	0.3278	3.50824	0.70381		1829	55	1895	31	1952	26	1952	26
BRK14_9_39	293.252	0.1202	1.37271	5.36	3.54478	0.3236	3.39926	0.70716		1811	50	1880	31.5	1956	25	1956	25
BRK14_9_30	125.023	0.121	1.44628	5.14	3.59922	0.3055	3.43699	0.75833		1720	50	1841	31.5	1967	26	1967	26
BRK14_9_3	346.494	0.12226	1.34958	6.149	3.4965	0.363	3.30579	0.77432		1998	55	1995	31	1988	24	1988	24
BRK14_9_12	277.943	0.1226	1.38662	5.91	3.4687	0.3457	3.32658	0.78138		1913	55	1965	31	1991	24.5	1991	24.5
BRK14_9_76	51.6764	0.1283	1.7537	6.55	3.74046	0.367	3.40599	0.077266		2021	60	2046	32	2061	29	2061	29
BRK14_9_87	78.4161	0.1294	1.50696	6.46	3.71517	0.3591	3.62016	0.77828		1975	60	2038	33.5	2091	26.5	2091	26.5
BRK14_9_53	103.931	0.132	1.43939	6.94	3.53026	0.3825	3.26797	0.64896		2087	60	2107	32	2121	25	2121	25
BRK14_9_79	116.008	0.1336	1.42216	7.2	3.61111	0.3911	3.32396	0.81362		2127	60	2136	32.5	2144	24.5	2144	24.5
BRK14_9_52	146.626	0.1492	1.37399	8.24	3.51942	0.4025	3.35404	0.88512		2179	60	2261	35	2334	23.5	2334	23.5
BRK14_9_47	332.205	0.1514	1.35403	8.92	3.47534	0.4254	3.29102	0.81417		2287	65	2330	32.5	2361	23.5	2361	23.5
BRK14_9_34	219.259	0.1755	1.39601	10.05	3.53234	0.4114	3.40301	0.80031		2220	70	2439	40.5	2614	23	2614	23
BRK14_9_63	94.7457	0.1845	1.40921	13.21	3.55791	0.508	3.44488	0.87501		2654	75	2697	35.5	2696	22	2696	22
BRK14_9_28	229.975	0.1851	1.35062	12.56	3.54299	0.4883	3.37907	0.9193		2561	70	2644	34	2700	22.5	2700	22.5
BRK14_9_60	140.162	0.1905	1.39108	12.78	3.56025	0.4818	3.42466	0.80564		2533	70	2662	33	2746	22.5	2746	22.5
BRK14_9_67	56.8134	0.193	1.47668	10.73	3.63467	0.383	3.65535	0.90108		2102	65	2492	37	2766	24	2766	24
BRK14_9_17	250.047	0.1947	1.41243	14.39	3.47464	0.529	3.40265	0.70616		2735	75	2774	36	2785	21.5	2785	21.5
BRK14-10_Type 2
					Isotopic Ratios							Apparent Ages
Analysis	U	207Pb*	±	207Pb*	±	206Pb*	±	error		206Pb*	±	207Pb*	±	206Pb*	±	Best	±
	(ppm)	206Pb*	(%)	235U	(%)	238U	(%)	corr.		238U	Ma	235U	Ma	207Pb*	Ma	Age†	Ma††
BRK14_10_75	530.712	0.0614	1.4658	0.4493	3.5611	0.05404	3.23834	0.59595		339.2	11	377.2	11	652	32	339.2	11
BRK14_10_89	199.357	0.0558	1.97133	0.433	3.81062	0.05484	3.5558	0.29612		344.1	12	364.1	12	427	41.5	344.1	12
BRK14_10_38	379.833	0.0576	1.82292	0.451	3.7694	0.0573	3.40314	0.2169		359.1	12	377.9	12	510	42	359.1	12
BRK14_10_29	343.772	0.054	1.75926	0.426	3.75587	0.0573	3.4904	0.50151		359.2	12.5	360.2	11.5	354	39	359.2	12.5
BRK14_10_37	324.04	0.0648	1.92901	0.508	3.83858	0.05749	3.47887	0.34374		360.3	12	418	13.5	743	40.5	360.3	12
BRK14_10_68	505.197	0.0619	1.69628	0.5	3.7	0.05866	3.40948	0.03213		367.4	12	410.6	12.5	671	32	367.4	12
BRK14_10_1	2440.93	0.05529	1.35648	0.4509	3.54846	0.0589	3.39559	0.77108		368.9	12.5	377.7	11.5	423	30	368.9	12.5
BRK14_10_10	1024	0.05769	1.47339	0.4755	3.68034	0.05972	3.43269	0.30998		373.9	12.5	394.5	12	510	32	373.9	12.5
BRK14_10_12	339.349	0.0554	1.62455	0.451	3.7694	0.06009	3.41155	0.49974		376.1	12.5	378.2	11.5	419	37.5	376.1	12.5
BRK14_10_85	989.982	0.05709	1.48888	0.473	3.48837	0.06049	3.30633	0.58052		378.5	12	392.8	11.5	487	32.5	378.5	12
BRK14_10_28	280.495	0.0561	1.87166	0.483	3.83023	0.06054	3.55137	0.26956		378.9	13	399	12.5	441	40.5	378.9	13
BRK14_10_70	755.244	0.05575	1.52466	0.4611	3.5784	0.06109	3.3557	0.32266		382.2	12.5	384.7	11.5	436	33.5	382.2	12.5
BRK14_10_2	273.861	0.0547	1.82815	0.472	3.70763	0.06127	3.42745	0.41937		383.3	13	391.4	12.5	392	40	383.3	13
BRK14_10_86	747.76	0.05563	1.52795	0.4838	3.6172	0.06272	3.42793	0.099699		392.6	13	400.2	12	428	34.5	392.6	13
BRK14_10_95	151.899	0.0545	2.11009	0.471	4.03397	0.0633	3.63349	0.44454		395.6	14	393	12.5	387	46.5	395.6	14
BRK14_10_58	234.908	0.0607	1.81219	0.524	3.72137	0.0643	3.42146	0.29313		401.4	13.5	427.5	13	630	38.5	401.4	13.5
BRK14_10_56	299.376	0.0562	1.86833	0.505	4.55446	0.065	3.38462	0.99966		406.1	13.5	412	12.5	434	41	406.1	13.5
BRK14_10_78	537.516	0.0562	1.60142	0.496	3.62903	0.065	3.30769	0.58087		406.5	13	408.3	12.5	462	36.5	406.5	13
BRK14_10_62	450.425	0.0615	1.78862	0.55	3.81818	0.0651	3.45622	0.40259		406.7	13.5	444	13.5	652	37	406.7	13.5
BRK14_10_7	172.311	0.0575	1.82609	0.514	3.89105	0.0654	3.44037	0.4867		408.3	13.5	420	13.5	485	40.5	408.3	13.5
BRK14_10_55	291.892	0.0544	1.83824	0.486	3.80658	0.06566	3.35059	0.30162		409.9	13.5	401.5	12.5	388	39	409.9	13.5
BRK14_10_41	72.4626	0.0567	2.46914	0.527	4.17457	0.0675	3.48148	0.34169		421	14	430	14.5	448	50	421	14
BRK14_10_93	270.629	0.0555	1.71171	0.529	3.6862	0.06758	3.40337	0.27183		421.5	14	431.5	13	432	37.5	421.5	14
BRK14_10_50	540.238	0.0562	1.60142	0.527	3.70019	0.06878	3.41669	0.2304		428.7	14	430	12.5	455	35	428.7	14
BRK14_10_26	56.133	0.0561	2.76292	0.562	4.35943	0.0699	3.64807	0.17311		435	15.5	449	15.5	400	55	435	15.5
BRK14_10_3	1124.36	0.05744	1.39276	0.568	3.60915	0.07121	3.44053	0.70088		443.4	14.5	456.3	13.5	508	31.5	443.4	14.5
BRK14_10_76	685.503	0.0565	1.50442	0.549	3.82514	0.0731	3.48837	0.60124		454.6	15.5	444.1	13.5	473	33	454.6	15.5
BRK14_10_81	245.965	0.057	2.01754	0.575	3.82609	0.0754	3.31565	0.19028		468.5	15	460	14	454	41	468.5	15
BRK14_10_92	280.665	0.0564	1.77305	0.598	3.76254	0.0762	3.47769	0.4304		473	16	476	14.5	466	40.5	473	16
BRK14_10_34	336.798	0.0575	1.65217	0.608	3.78289	0.07764	3.41319	0.4687		481.9	16	482.1	14.5	497	37	481.9	16
BRK14_10_65	734.832	0.05697	1.49201	0.61	3.60656	0.07778	3.40705	0.67236		482.8	16	482.9	14	487	31.5	482.8	16
BRK14_10_47	874.314	0.06184	1.61708	0.6791	3.68134	0.08013	3.43192	0.62134		496.9	16.5	526.7	15	668	32	496.9	16.5
BRK14_10_71	262.464	0.0582	1.71821	0.662	3.77644	0.0832	3.36538	0.52156		514.8	16.5	514	15	530	38.5	514.8	16.5
BRK14_10_80	103.081	0.0598	2.17391	0.716	3.84078	0.0887	3.38219	0.016997		548	18	547	16	575	46	548	18
BRK14_10_35	151.389	0.0619	1.77706	0.778	3.79177	0.0911	3.45774	0.46204		562.6	18	583	17.5	675	37	562.6	18
BRK14_10_13	489.888	0.0679	1.54639	0.873	3.72279	0.0952	3.36134	0.20676		586	19	636.3	17.5	854	32.5	586	19
BRK14_10_43	166.358	0.0641	1.87207	0.866	3.86836	0.0995	3.41709	0.35247		611.3	19.5	632	18	747	38	611.3	19.5
BRK14_10_39	252.258	0.062	1.6129	0.952	3.72899	0.1112	3.41727	0.35168		679.4	22	679.9	18.5	688	34.5	679.4	22
BRK14_10_30	111.926	0.0768	1.69271	1.424	3.51124	0.1326	3.39367	0.58624		803	25.5	899	22	1107	33.5	803	25.5
BRK14_10_77	351.256	0.07112	1.47638	1.578	3.48542	0.1655	3.32326	0.47994		986.9	30	960.6	22	961	31	961	31
BRK14_10_11	105.972	0.0809	1.66873	1.808	3.59513	0.164	3.35366	0.57206		981	31.5	1046	25	1206	33	981	31.5
BRK14_10_59	250.047	0.0738	2.84553	1.59	4.40252	0.1581	3.47881	0.12904		946	30	949	10	1001	30	1001	30
BRK14_10_66	63.7875	0.078	2.11538	1.837	4.08274	0.173	3.46821	0.44486		1028	33	1052	25.5	1102	39.5	1028	33
BRK14_10_46	404.158	0.07648	1.43828	1.702	3.81904	0.1608	3.4204	0.67444		961	30.5	1007	23.5	1105	29.5	1105	29.5
BRK14_10_61	146.966	0.0775	1.6129	1.756	3.70159	0.1662	3.30927	0.5109		991	31.5	1028	23.5	1131	31	1131	31
BRK14_10_87	154.791	0.0777	1.5444	2.177	3.67478	0.2032	3.44488	0.62743		1192	37.5	1174	25	1135	30.5	1135	30.5
BRK14_10_9	336.118	0.0802	1.43392	2.005	4.2394	0.1818	3.85039	0.83153		1076	37	1119	26.5	1200	28	1200	28
BRK14_10_42	110.905	0.0803	1.61893	1.635	4.28135	0.1451	3.79049	0.56309		873	31	980	25	1211	30	1211	30
BRK14_10_74	170.95	0.0813	1.47601	2.127	3.52609	0.1935	3.35917	0.54433		1140	34.5	1159	25	1229	30	1229	30
BRK14_10_52	116.008	0.0834	1.55875	2.43	3.7037	0.2167	3.46101	0.52946		1266	39.5	1251	26	1275	30.5	1275	30.5
BRK14_10_8	279.814	0.0877	1.48233	2.697	3.70782	0.2215	3.386	0.60996		1290	39.5	1328	26.5	1380	28.5	1380	28.5
BRK14_10_51	173.672	0.0883	1.47225	2.499	3.60144	0.2105	3.32542	0.61387		1231	39	1273	27.5	1398	29	1398	29
BRK14_10_54	337.138	0.08992	1.39012	2.765	3.61664	0.2267	3.30834	0.75368		1317	40.5	1346	27	1421	26.5	1421	26.5
BRK14_10_14	253.449	0.0909	1.43014	2.852	3.68163	0.2309	3.4647	0.62438		1339	41	1370	27.5	1445	27	1445	27
BRK14_10_40	210.414	0.0915	1.47541	2.901	3.61944	0.2318	3.45125	0.67602		1343	41.5	1382	27.5	1451	28	1451	28
BRK14_10_60	200.888	0.0914	1.47702	2.93	3.58362	0.2356	3.39559	0.5291		1363	42.5	1388	27.5	1452	29	1452	29
BRK14_10_36	641.277	0.0937	1.60085	2.524	3.76387	0.1955	3.32481	0.15786		1151	36	1275	27	1490	26.5	1490	26.5
BRK14_10_27	228.784	0.0932	1.4485	3.246	3.69686	0.2481	3.42604	0.71828		1428	44.5	1470	28	1492	27	1492	27
BRK14_10_31	85.2201	0.0942	1.4862	3.59	3.20334	0.267	3.18352	0.55209		1525	44	1545	30	1505	28	1505	28
BRK14_10_64	200.888	0.0938	1.59915	3.349	3.28456	0.2551	3.13603	0.59067		1468	42.5	1496	29	1514	26	1514	26
BRK14_10_82	258.552	0.1013	1.38203	3.968	3.52823	0.2893	3.28379	0.73383		1638	48	1629	30.5	1646	25.5	1646	25.5
BRK14_10_90	206.331	0.1034	1.83752	3.559	3.7932	0.2461	3.65705	0.41584		1420	45.5	1539	29.5	1674	30.5	1674	30.5
BRK14_10_18	190.342	0.1035	1.44928	2.676	3.73692	0.1902	3.41746	0.78903		1124	37	1320	27.5	1685	27.5	1685	27.5
BRK14_10_73	178.095	0.1034	1.45068	4.241	3.30111	0.3005	3.1614	0.62898		1693	49	1681	31	1685	25.5	1685	25.5
BRK14_10_53	104.782	0.1107	1.44535	4.785	3.65726	0.3195	3.44288	0.67965		1789	55	1781	31.5	1807	26.5	1807	26.5
BRK14_10_25	392.421	0.1117	1.38765	3.474	3.59816	0.2201	3.63471	0.16577		1282	41	1521	28	1824	25.5	1824	25.5
BRK14_10_44	214.326	0.1118	1.43113	4.843	3.61346	0.3161	3.47991	0.69851		1772	55	1792	30	1830	25.5	1830	25.5
BRK14_10_84	192.723	0.1123	1.42476	4.71	3.50318	0.3098	3.22789	0.64311		1739	50	1766	32.5	1833	25.5	1833	25.5
BRK14_10_33	146.796	0.1126	1.46536	4.638	3.77318	0.2999	3.66789	0.87149		1688	50	1752	31	1837	27	1837	27
BRK14_10_4	69.0606	0.1131	1.50309	5.015	3.68893	0.319	3.44828	0.62578		1786	55	1820	31	1847	27	1847	27
BRK14_10_83	157.002	0.1137	1.45119	4.965	3.52467	0.322	3.26087	0.70063		1801	55	1814	29.5	1860	26	1860	26
BRK14_10_88	166.358	0.1138	1.44991	5.174	3.57557	0.3252	3.38253	0.57438		1814	55	1851	29	1862	25	1862	25
BRK14_10_6	247.836	0.1181	1.35478	5.605	3.56824	0.3442	3.34108	0.79837		1906	55	1916	31.5	1929	23.5	1929	23.5
BRK14_10_5	205.651	0.1197	1.37845	5.302	3.58355	0.3224	3.41191	0.74188		1801	55	1869	30	1952	24.5	1952	24.5
BRK14_10_16	108.013	0.1284	1.40187	6.47	3.63215	0.3705	3.37382	0.82385		2034	60	2041	33.5	2079	25	2079	25
BRK14_10_91	113.287	0.1288	1.43634	6.36	3.69497	0.3518	3.55316	0.7085		1942	60	2029	32	2082	24.5	2082	24.5
BRK14_10_32	221.64	0.1298	1.38675	6.354	3.61977	0.3483	3.44531	0.22344		1925	60	2024	32.5	2097	26	2097	26
BRK14_10_19	659.648	0.132	1.40152	4.935	3.64742	0.2714	3.31614	0.70716		1547	46.5	1808	30.5	2126	24.5	2126	24.5
BRK14_10_20	119.75	0.1346	1.48588	5.57	3.68043	0.3039	3.45508	0.32865		1714	50	1909	31	2157	26	2157	26
BRK14_10_49	125.194	0.1473	1.42566	8.5	3.70588	0.4215	3.44009	0.25499		2269	65	2286	30	2311	24	2311	24
BRK14_10_23	60.2154	0.1478	1.52233	6.23	3.5313	0.2992	3.34225	0.63529		1687	50	2006	33.5	2313	24.5	2313	24.5
BRK14_10_57	498.563	0.1499	1.33422	5.92	3.63176	0.2902	3.4459	0.89741		1646	49	1962	34	2346	23	2346	23
BRK14_10_63	323.36	0.1691	1.36014	9.44	3.49576	0.4057	3.32758	0.87446		2194	65	2380	33	2547	22.5	2547	22.5
BRK14_10_79	31.4005	0.1718	1.57159	11.75	3.57447	0.5082	3.34514	0.60635		2651	70	2581	34	2571	26	2571	26
BRK14_10_21	172.481	0.1833	1.30933	10.15	3.59606	0.3963	3.40651	0.095422		2158	70	2446	48.5	2682	22.5	2682	22.5
BRK14_10_17	107.333	0.1857	1.37318	13.29	3.64936	0.5253	3.42661	0.9193		2727	75	2703	34.5	2702	23	2702	23
BRK14_10_69	215.687	0.1857	1.37318	11.22	3.47594	0.4458	3.25258	0.90562		2375	70	2542	36.5	2705	23.5	2705	23.5
BRNF15-61_Type 2
					Isotopic Ratios							Apparent Ages
Analysis	U	207Pb*	±	207Pb*	±	206Pb*	±	error		206Pb*	±	207Pb*	±	206Pb*	±	Best	±
	(ppm)	206Pb*	(%)	235U	(%)	238U	(%)	corr.		238U	Ma	235U	Ma	207Pb*	Ma	Age†	Ma††
BRNF15_61_15	377.962	0.0536	1.77239	0.3865	3.75162	0.0537	3.35196	0.22168		337.2	65	331.2	10.5	341	39.5	337.2	11
BRNF15_61_30	271.82	0.0529	1.89036	0.405	3.82716	0.05567	3.41297	0.33443		349.7	11.5	345.4	11.5	319	40.5	349.7	11.5
BRNF15_61_54	190.002	0.0554	2.07581	0.42	3.92857	0.05662	3.44401	0.20076		355	12	356	12	399	46	355	12
BRNF15_61_11	2469.85	0.06771	1.40304	0.517	4.25532	0.0573	4.01396	0.46856		359.2	14	422.6	14	856	29	359.2	14
BRNF15_61_53	280.495	0.0533	1.96998	0.421	3.80048	0.05746	3.39367	0.040755		360.1	12	355.6	11.5	332	41	360.1	12
BRNF15_61_28	254.98	0.0533	1.87617	0.425	3.76471	0.0575	3.47826	0.29091		360.3	12	359.1	11.5	324	40.5	360.3	12
BRNF15_61_3	1437.34	0.05909	1.43848	0.487	3.59343	0.05855	3.58668	0.68384		366.8	13	403.2	12	566	31.5	366.8	13
BRNF15_61_17	356.019	0.0538	2.13755	0.435	4.02299	0.05966	3.35233	-0.16554		373.5	12	365	11.5	333	39	373.5	12
BRNF15_61_25	476.11	0.0541	1.57116	0.4559	3.61921	0.06081	3.45338	0.38045		380.5	13	381	11.5	371	35	380.5	13
BRNF15_61_26	178.945	0.0566	1.85512	0.487	3.90144	0.0611	3.60065	0.44809		382.2	13.5	401.8	13	481	40.5	382.2	13.5
BRNF15_61_29	360.272	0.0556	1.70863	0.4666	3.64338	0.06124	3.42913	0.10421		383.1	13	389.1	12	429	38.5	383.1	13
BRNF15_61_43	520.336	0.05609	1.51542	0.4718	3.60322	0.06236	3.36754	0.40383		389.9	12.5	391.9	11.5	445	35	389.9	12.5
BRNF15_61_38	296.314	0.0564	1.77305	0.476	3.67647	0.06248	3.36108	0.36007		391.2	13	394.8	12	465	39	391.2	13
BRNF15_61_19	415.214	0.0538	1.7658	0.472	3.70763	0.06337	3.47167	0.42617		396	13	392.7	12	356	39.5	396	13
BRNF15_61_21	392.931	0.0553	1.80832	0.486	3.90947	0.06371	3.45315	0.53013		398.1	13.5	401.8	12	419	39	398.1	13.5
BRNF15_61_34	517.444	0.05461	1.46493	0.4779	3.66185	0.06439	3.33903	0.42991		402.2	13	397.5	12	402	33.5	402.2	13
BRNF15_61_1	244.944	0.056	1.69643	0.509	3.63458	0.06441	3.41562	0.35227		402.3	13.5	419.8	12	443	37	402.3	13.5
BRNF15_61_13	700.812	0.05432	1.5648	0.4737	3.69432	0.06439	3.49433	0.42399		402.3	65	394.2	12.5	398	35	402.3	13.5
BRNF15_61_39	310.773	0.0556	1.97842	0.492	3.86179	0.06488	3.31381	0.13998		405.2	13	405	12.5	409	41	405.2	13
BRNF15_61_37	399.395	0.056	1.69643	0.492	3.65854	0.06503	3.38305	0.33802		406.1	13.5	406.6	12	440	37	406.1	13.5
BRNF15_61_33	202.589	0.0561	2.40642	0.494	3.94737	0.0654	3.74618	0.04179		408	14	406	13	422	50	408	14
BRNF15_61_31	103.421	0.0542	2.49077	0.488	4.09836	0.0659	3.41426	0.060429		411.3	13.5	404	13	353	50	411.3	13.5
BRNF15_61_52	306.18	0.0558	1.97133	0.512	4.78516	0.06618	3.92868	0.2642		413.1	15.5	419.8	15	430	40.5	413.1	15.5
BRNF15_61_36	218.578	0.0556	1.88849	0.506	3.75494	0.06646	3.31026	0.22003		414.8	13.5	412.9	12.5	428	39.5	414.8	13.5
BRNF15_61_47	454.167	0.05519	1.54013	0.5108	3.62177	0.06746	3.33531	0.38778		420.8	13.5	419.2	12.5	423	33.5	420.8	13.5
BRNF15_61_18	87.6015	0.0535	2.42991	0.489	3.98773	0.0678	3.53982	0.23285		422.5	14.5	404	13	343	50	422.5	14.5
BRNF15_61_55	574.768	0.05676	1.49753	0.5297	3.58694	0.06876	3.34497	0.45553		428.7	14	431.1	13	477	34	428.7	14
BRNF15_61_20	328.633	0.0557	1.79533	0.53	3.77358	0.06881	3.4152	-0.06842		429	14	430.4	13	418	39.5	429	14
BRNF15_61_9	427.461	0.0587	1.6184	0.555	3.6036	0.06959	3.30507	0.40944		433.7	14	448.4	13	566	32	433.7	14
BRNF15_61_7	386.127	0.0552	1.72101	0.524	3.81679	0.0699	3.43348	0.39359		435.4	14.5	431	13.5	401	39	435.4	14.5
BRNF15_61_42	157.172	0.063	7.14286	0.629	7.47218	0.0731	3.35157	0.010005		454.9	15	467	10.5	530	55	454.9	15
BRNF15_61_40	145.946	0.0564	2.03901	0.569	3.86643	0.0737	3.39213	0.31177		458.4	15	458	14	458	44.5	458.4	15
BRNF15_61_45	207.862	0.0576	1.99653	0.598	3.84615	0.0765	3.33333	0.32991		474.9	15.5	474	14.5	499	43	474.9	15.5
BRNF15_61_51	201.909	0.0584	1.88356	0.617	3.80875	0.0771	3.37224	0.20347		479	16	486	14	517	41	479	16
BRNF15_61_48	254.47	0.0584	1.71233	0.674	3.7092	0.0844	3.31754	0.34216		523.2	17	522.4	15	546	39.5	523.2	17
BRNF15_61_8	230.996	0.059	1.77966	0.688	3.63372	0.0855	3.33333	0.25341		528.7	17.5	530.5	15	573	38.5	528.7	17.5
BRNF15_61_22	454.167	0.0752	1.46277	0.929	4.14424	0.09	4.05556	0.74513		555	21.5	666	19	1078	29	555	21.5
BRNF15_61_4	311.453	0.073	1.50685	1.612	3.41191	0.1596	3.44612	0.29352		954	30	973	22.5	1007	30.5	1007	30.5
BRNF15_61_50	166.188	0.0746	1.47453	1.696	3.53774	0.1671	3.29144	0.57442		997	34.5	1005	23	1052	29.5	1052	29.5
BRNF15_61_35	120.38	0.0767	1.69492	1.945	3.59897	0.1884	3.45011	0.25551		1112	34.5	1097	25	1113	35	1113	35
BRNF15_61_24	644.679	0.07834	1.40414	1.84	3.53261	0.1693	3.544	0.78453		1008	32.5	1058.7	23.5	1153	27.5	1153	27.5
BRNF15_61_2	18.5239	0.0856	2.21963	2.73	4.0293	0.2272	3.52113	0.56967		1318	42.5	1331	31.5	1327	46	1327	46
BRNF15_61_32	160.234	0.0902	1.44124	3.159	3.64039	0.2575	3.30097	0.74819		1476	44.5	1443	28	1425	27.5	1425	27.5
BRNF15_61_44	179.966	0.09316	1.39545	3.269	3.5179	0.2571	3.30611	0.75604		1475	44	1473	27.5	1488	26	1488	26
BRNF15_61_49	95.9364	0.1001	1.4985	3.498	3.71641	0.2565	3.31384	0.63743		1471	55	1529	28.5	1626	28.5	1626	28.5
BRNF15_61_23	33.8159	0.1096	1.91606	4.71	3.82166	0.3118	3.5279	0.50332		1747	55	1764	33	1782	33.5	1782	33.5
BRNF15_61_27	509.96	0.11403	1.35929	5.17	3.57834	0.3275	3.35878	0.79472		1826	50	1847.8	30.5	1863	24	1863	24
BRNF15_61_10	275.902	0.11565	1.38348	4.936	3.54538	0.3157	3.32594	0.82576		1770	60	1807	29	1890	24.5	1890	24.5
BRNF15_61_12	75.6945	0.1277	1.48786	6.36	3.61635	0.3687	3.39029	0.72444		2022	60	2026	32	2065	25.5	2065	25.5
BRNF15_61_14	302.608	0.1601	1.37414	9.59	3.5975	0.441	3.28798	0.85478		2356	13.5	2396	33.5	2455	23	2455	23
BRNF15_61_6	176.224	0.1672	1.3756	10.83	3.4626	0.4703	3.29577	0.79413		2484	70	2508	32.5	2528	23	2528	23
BRNF15_61_46	976.544	0.18407	1.33102	12.55	3.54582	0.5014	3.29079	0.89762		2619	75	2646	33.5	2689.3	22	2689.3	22
BRNF15_61_5	118.56	0.1859	1.37171	13.09	3.51413	0.5112	3.42332	0.8408		2660	75	2684	34	2706	23	2706	23
BRK14-5_Type 2
					Isotopic Ratios							Apparent Ages
Analysis	U	207Pb*	±	207Pb*	±	206Pb*	±	error		206Pb*	±	207Pb*	±	206Pb*	±	Best	±
	(ppm)	206Pb*	(%)	235U	(%)	238U	(%)	corr.		238U	Ma	235U	Ma	207Pb*	Ma	Age†	Ma††
BRK14_5_91	688.565	0.0639	1.72144	0.46	3.58696	0.05334	3.56205	0.084873		335	11.5	385	11.5	732	38.5	335	11.5
BRK14_5_66	872.613	0.0647	1.39104	0.4923	3.65631	0.05385	3.52832	0.58433		338.1	11.5	406	12.5	761	29	338.1	11.5
BRK14_5_59	358.06	0.0536	1.6791	0.405	3.82716	0.05443	3.49072	0.42714		341.6	11.5	344.7	11	345	37	341.6	11.5
BRK14_5_74	751.672	0.0565	1.50442	0.421	3.80048	0.0552	3.53261	0.32475		346.3	12	356.3	11.5	458	34	346.3	12
BRK14_5_21	2980.15	0.05985	1.16959	0.46	4.34783	0.0563	3.81883	0.81036		353.3	13	384.2	12.5	601	22	353.3	13
BRK14_5_54	315.706	0.0634	1.57729	0.493	3.65112	0.05682	3.78388	0.29082		356.2	13	406	12	726	36	356.2	13
BRK14_5_63	197.486	0.0528	1.79924	0.427	3.74707	0.0569	3.51494	0.15055		356.7	12	360	11.5	304	40	356.7	12
BRK14_5_32	403.137	0.055	1.36364	0.441	2.38095	0.05791	2.76291	0.22069		362.8	10	370.4	7.5	407	31.5	362.8	10
BRK14_5_40	347.004	0.0647	1.23648	0.535	2.42991	0.0584	3.08219	0.70083		365.8	11	433.1	9	765	25.5	365.8	11
BRK14_5_69	315.706	0.0601	1.66389	0.511	3.91389	0.06114	3.51652	0.39943		382.5	13	419	13	596	35.5	382.5	13
BRK14_5_8	1119.26	0.0665	1.20301	0.564	2.39362	0.06229	2.72917	0.60219		389.5	10.5	453.3	8.5	807	24	389.5	10.5
BRK14_5_76	714.42	0.057	1.49123	0.477	3.77358	0.06228	3.53243	0.41341		389.5	13.5	396.7	12	476	33.5	389.5	13.5
BRK14_5_20	266.717	0.0562	1.42349	0.48	2.5	0.0624	2.80449	0.32468		390.3	10.5	399.3	8	456	32	390.3	10.5
BRK14_5_29	554.526	0.05472	1.09649	0.4677	2.24503	0.06265	2.71349	0.51147		391.7	10.5	389.1	7.5	402	24	391.7	10.5
BRK14_5_89	477.981	0.05685	1.40721	0.4873	3.48861	0.06294	3.41595	0.36079		393.4	13	402.6	12	478	32	393.4	13
BRK14_5_6	591.948	0.0546	1.19048	0.4733	2.32411	0.06308	2.77425	0.074042		394.8	10.5	392.9	7.5	381	26.5	394.8	10.5
BRK14_5_87	716.121	0.0567	1.49912	0.492	3.55691	0.0632	3.4019	0.52479		395	13	405.5	12	481	32.5	395	13
BRK14_5_17	414.704	0.0558	1.34409	0.499	2.40481	0.06341	2.75982	0.28406		396.3	10.5	410.5	8	429	29	396.3	10.5
BRK14_5_86	756.945	0.0554	1.35379	0.468	3.52564	0.0636	3.3805	0.57538		397.1	13	390.4	11.5	420	30	397.1	13
BRK14_5_9	268.418	0.054	1.48148	0.476	2.41597	0.06409	2.73054	0.17944		400.4	10.5	394.4	8	363	33.5	400.4	10.5
BRK14_5_44	219.089	0.0573	1.48342	0.513	2.53411	0.06454	2.78897	0.38596		403.2	11	420.1	8.5	488	32	403.2	11
BRK14_5_47	471.517	0.0555	1.17117	0.504	2.38095	0.06477	2.85626	0.42526		404.5	11	414.6	8	430	26	404.5	11
BRK14_5_4	441.069	0.0583	1.20069	0.527	2.37192	0.06503	2.76795	0.34053		406.1	11	428.9	8.5	541	27.5	406.1	11
BRK14_5_83	515.403	0.0601	1.4975	0.537	3.63128	0.06505	3.45888	0.53712		406.2	14	436.9	13	606	33	406.2	14
BRK14_5_65	355.339	0.0597	1.67504	0.554	3.79061	0.06516	3.45304	0.41155		406.9	13.5	446.9	13.5	601	35	406.9	13.5
BRK14_5_18	356.189	0.0638	2.89969	0.571	3.0648	0.0652	2.68405	0.42867		407.3	10.5	458	10.5	734	44.5	407.3	10.5
BRK14_5_30	449.404	0.0585	1.19658	0.529	2.55198	0.06535	2.83091	0.41158		408.8	11	430.1	9	536	26.5	408.8	11
BRK14_5_82	324.891	0.0542	1.66052	0.488	3.79098	0.066	3.56061	0.38764		411.9	14	403.7	12.5	360	37.5	411.9	14
BRK14_5_24	467.775	0.0592	1.35135	0.55	2.54545	0.06683	2.76822	0.3979		416.9	11	445	9	572	28	416.9	11
BRK14_5_7	897.448	0.05851	1.02547	0.5499	2.27314	0.06874	2.76404	0.51812		428.5	11.5	445.2	8.5	547	21.5	428.5	11.5
BRK14_5_39	106.653	0.0625	2.32	0.593	3.03541	0.0697	2.86944	0.41053		434.3	12	473	11.5	659	47.5	434.3	12
BRK14_5_81	523.568	0.05806	1.37788	0.56	3.66071	0.0704	3.55114	0.77424		438.6	15	452	13.5	534	32	438.6	15
BRK14_5_88	207.012	0.0564	1.77305	0.567	3.7037	0.0729	3.42936	0.37793		453.6	15	456	14	455	40.5	453.6	15
BRK14_5_42	222.151	0.0573	1.48342	0.691	2.53256	0.0862	2.78422	0.087489		532.8	14.5	532	10.5	478	31.5	532.8	14.5
BRK14_5_68	532.923	0.06163	1.3792	0.753	3.65206	0.0866	3.52194	0.39006		535.3	18	569.9	16	655	30	535.3	18
BRK14_5_60	176.053	0.0714	1.47059	1.34	3.73134	0.1355	3.50554	0.57016		819	27	862	21.5	962	29.5	819	27
BRK14_5_34	1068.23	0.06766	0.812888	1.015	2.16749	0.1088	2.7114	0.41777		665.6	17.5	710.9	11	857	16.5	857	16.5
BRK14_5_85	171.631	0.0791	2.59166	1.593	3.76648	0.1484	3.16712	0.46698		892	27.5	964	23	1182	39.5	892	27.5
BRK14_5_77	67.6998	0.0746	2.47989	1.547	4.20168	0.1524	3.60892	0.18972		914	30.5	951	25	1049	46	914	30.5
BRK14_5_35	877.716	0.072	0.972222	1.278	3.09077	0.1318	3.14871	0.64788		798	24	838	16	982	18.5	982	18.5
BRK14_5_62	600.623	0.072	1.25	1.37	3.61314	0.1339	3.51008	0.71198		810	27	876.5	21.5	982	26	982	26
BRK14_5_1	537.006	0.0724	0.966851	1.279	2.15012	0.1287	2.68065	0.56614		782	20	835	13	996	19.5	996	19.5
BRK14_5_19	428.482	0.0747	0.937082	1.412	2.33711	0.1344	2.67857	0.66968		813	21	893	15	1059	17.5	1059	17.5
BRK14_5_46	785.862	0.07523	0.864017	1.812	2.2351	0.1698	2.79741	0.5567		1011	26	1049.7	14.5	1073	17.5	1073	17.5
BRK14_5_72	222.661	0.0761	1.31406	1.858	3.76749	0.1803	3.6051	0.61552		1070	34	1065	24.5	1092	27	1092	27
BRK14_5_23	225.212	0.0767	0.977836	1.699	2.29547	0.1574	2.76366	-0.14689		942	23.5	1005	15	1102	19	1102	19
BRK14_5_45	72.8028	0.0766	1.30548	1.902	2.41851	0.1766	2.83126	0.52727		1048	28	1078	16.5	1103	26	1103	26
BRK14_5_11	226.063	0.0766	0.979112	1.8	2.33333	0.1683	2.76292	0.59706		1003	25.5	1045	15	1111	19.5	1111	19.5
BRK14_5_56	156.662	0.0776	1.41753	1.924	3.63825	0.185	3.51351	0.2598		1094	36	1089	24.5	1135	30.5	1135	30.5
BRK14_5_5	406.369	0.078	1.02564	1.524	2.23097	0.142	2.78169	0.45615		856	22	939	14	1139	20	1139	20
BRK14_5_80	229.125	0.0792	1.32576	1.979	3.78979	0.1815	3.58127	0.67143		1075	35	1108	25	1185	29	1185	29
BRK14_5_64	71.1018	0.0801	2.18477	1.697	4.12493	0.1477	3.38524	0.50732		889	29.5	1006	25.5	1201	40	1201	40
BRK14_5_67	207.182	0.0853	1.34818	2.556	3.71674	0.2136	3.51124	0.60658		1249	40.5	1289	27	1318	26.5	1318	26.5
BRK14_5_79	77.0553	0.0902	1.44124	3.047	3.7742	0.2439	3.69004	0.56631		1408	45	1416	28	1425	28	1425	28
BRK14_5_13	477.301	0.0903	0.775194	2.877	2.2593	0.2256	2.65957	0.69208		1311	32.5	1374	20	1428	15.5	1428	15.5
BRK14_5_52	689.926	0.09363	1.22824	2.948	3.73134	0.2442	3.48075	0.79894		1408	45	1393	28	1502	24	1502	24
BRK14_5_71	222.321	0.0939	1.3312	2.978	3.52586	0.233	3.43348	0.66938		1352	42.5	1404	28.5	1509	26	1509	26
BRK14_5_22	292.232	0.0988	0.809717	3.668	2.18103	0.2664	2.81532	0.72183		1522	37.5	1563	17.5	1605	15.5	1605	15.5
BRK14_5_93	522.207	0.0998	1.25251	3.473	3.45523	0.2537	3.35041	0.76505		1457	45	1520	27.5	1619	23.5	1619	23.5
BRK14_5_36	523.908	0.1032	1.01744	3.096	2.26098	0.2148	2.7933	0.41763		1254	32	1432	17	1675	18.5	1675	18.5
BRK14_5_2	521.016	0.10641	0.751809	4.235	2.12515	0.2872	2.78552	0.49173		1627	39.5	1681.9	18	1739	14.5	1739	14.5
BRK14_5_78	464.373	0.10706	1.21427	4.521	3.53904	0.3047	3.44601	0.79797		1714	50	1736	30	1748	22	1748	22
BRK14_5_31	278.794	0.1073	0.792171	4.445	2.13723	0.3023	2.64638	0.70855		1705	41	1722	18.5	1754	14.5	1754	14.5
BRK14_5_28	277.943	0.10836	0.784422	4.484	2.23015	0.2998	2.66845	0.61622		1690	40.5	1726.9	18	1772	14.5	1772	14.5
BRK14_5_10	697.75	0.11279	0.753613	5.02	2.19124	0.323	2.78638	0.8184		1804	43	1824	19	1843	13.5	1843	13.5
BRK14_5_25	445.492	0.1133	0.794351	4.858	2.16138	0.311	2.73312	0.71923		1748	41.5	1794	18	1853	14	1853	14
BRK14_5_55	768.001	0.1161	1.20586	3.332	3.45138	0.2198	3.41219	0.76867		1284	40	1487	29	1895	22	1895	22
BRK14_5_90	323.87	0.1164	1.28866	5.121	3.51494	0.3195	3.44288	0.65219		1791	55	1839	30.5	1905	23.5	1905	23.5
BRK14_5_58	117.199	0.1661	1.2643	9.77	3.68475	0.4274	3.50959	0.83635		2292	70	2410	35	2516	21	2516	21
BRK14_5_48	93.7251	0.1894	0.871172	12.75	2.31373	0.4754	2.83971	0.7343		2506	60	2662	22	2736	14.5	2736	14.5
BRK14-4_Type 2
					Isotopic Ratios							Apparent Ages
Analysis	U	207Pb*	±	207Pb*	±	206Pb*	±	error		206Pb*	±	207Pb*	±	206Pb*	±	Best	±
	(ppm)	206Pb*	(%)	235U	(%)	238U	(%)	corr.		238U	Ma	235U	Ma	207Pb*	Ma	Age†	Ma††
BRK14_4_30	2636.55	0.05466	1.28064	0.351	6.72934	0.04724	3.70449	0.67049		297.6	10.5	305.3	10	399	28.5	297.6	10.5
BRK14_4_1	598.752	0.0592	1.52027	0.4094	6.22741	0.05099	3.5301	0.94124		320.6	11	347.8	11	557	35	320.6	11
BRK14_4_49	1156.68	0.0617	1.37763	0.4517	5.86119	0.05295	3.49386	0.66688		332.6	11.5	378.1	11.5	656	28.5	332.6	11.5
BRK14_4_11	435.286	0.0556	1.52878	0.4196	6.65634	0.05586	3.49087	0.43861		350.4	12	355.3	11	424	33.5	350.4	12
BRK14_4_9	923.643	0.0655	1.45038	0.502	5.59562	0.05618	3.47099	0.19641		352.3	12	412.2	12.5	780	31	352.3	12
BRK14_4_6	357.21	0.0533	1.59475	0.4093	6.89714	0.05646	3.54233	0.36124		354	12	347.9	11	327	35	354	12
BRK14_4_36	857.304	0.05494	1.45613	0.4326	6.58923	0.05701	3.50816	0.39919		357.4	12	364.7	11	406	33.5	357.4	12
BRK14_4_81	481.893	0.053	1.60377	0.417	6.86451	0.05725	3.58079	0.25566		358.8	12.5	354.1	11	326	36	358.8	12.5
BRK14_4_39	929.086	0.05761	1.38865	0.4623	6.25784	0.05786	3.54303	0.56862		362.6	12.5	386.1	11.5	514	31.5	362.6	12.5
BRK14_4_41	425.08	0.0558	1.6129	0.455	6.37473	0.05801	3.53387	0.31815		363.5	12.5	380	12	438	36.5	363.5	12.5
BRK14_4_48	522.207	0.05393	1.4834	0.4347	6.68047	0.05808	3.52961	0.30082		363.9	12.5	366.1	11.5	361	34	363.9	12.5
BRK14_4_35	305.5	0.0531	1.69492	0.431	6.81787	0.05877	3.57325	0.23811		368.1	12.5	365.3	11.5	319	38.5	368.1	12.5
BRK14_4_25	278.794	0.0538	1.7658	0.432	6.81713	0.0589	3.56537	0.46513		368.9	12.5	364.4	12	362	38	368.9	12.5
BRK14_4_20	488.357	0.0539	1.48423	0.434	6.79839	0.05901	3.55872	0.48195		369.5	12.5	366.9	11.5	364	34.5	369.5	12.5
BRK14_4_95	449.064	0.0524	1.52672	0.4201	7.06736	0.05938	3.53654	0.25894		371.8	13	356.3	11	287	34	371.8	13
BRK14_4_79	661.519	0.05787	1.38241	0.483	6.1501	0.05941	3.53476	0.64611		372	12.5	400	12.5	527	29.5	372	12.5
BRK14_4_88	1634.66	0.05631	1.33191	0.4556	6.54083	0.0596	3.52349	0.64172		373.2	13	380.8	11.5	465	28.5	373.2	13
BRK14_4_14	760.347	0.0608	1.80921	0.505	6.02574	0.06086	3.5327	0.0098694		380.8	13	413.9	13	596	35.5	380.8	13
BRK14_4_64	125.534	0.0585	2.22222	0.481	6.33056	0.0609	3.61248	0.30158		380.8	13.5	399	13	544	47.5	380.8	13.5
BRK14_4_52	554.356	0.0547	1.55393	0.471	6.47134	0.06096	3.28084	0.28595		381.5	12.5	391	11.5	385	34	381.5	12.5
BRK14_4_61	47.713	0.0595	2.85714	0.49	6.27551	0.0615	3.65854	0.21333		384.7	13.5	404	14.5	530	60	384.7	13.5
BRK14_4_47	745.038	0.06124	1.38798	0.5264	5.87956	0.0619	3.47334	0.097976		387.1	13	429	13	651	31.5	387.1	13
BRK14_4_40	459.44	0.0587	1.44804	0.51	6.10294	0.06225	3.53414	0.46811		389.3	13.5	418.7	12.5	556	33	389.3	13.5
BRK14_4_78	173.332	0.0553	1.89873	0.486	6.44547	0.06265	3.51157	0.15472		392.3	13.5	402.4	13	413	41	392.3	13.5
BRK14_4_53	425.93	0.0622	1.60772	0.538	5.85409	0.06299	3.572	0.014324		393.7	13.5	435.8	13.5	660	35	393.7	13.5
BRK14_4_60	675.297	0.0547	1.46252	0.4698	6.72946	0.06323	3.55844	0.50121		395.2	13.5	391.3	12	401	34	395.2	13.5
BRK14_4_82	889.793	0.05556	1.34989	0.4843	6.53004	0.06325	3.47826	0.4377		395.3	13.5	400.7	12.5	433	31.5	395.3	13.5
BRK14_4_23	486.826	0.0542	1.47601	0.465	6.79785	0.06322	3.47991	0.45244		395.7	13.5	388	12	373	34.5	395.7	13.5
BRK14_4_8	562.18	0.0559	1.52057	0.482	6.57676	0.0634	3.5489	0.58393		396.2	13.5	399.9	12.5	439	32.5	396.2	13.5
BRK14_4_73	561.33	0.06	1.5	0.531	5.99247	0.06364	3.53551	0.57067		397.7	13.5	433.1	13	604	31	397.7	13.5
BRK14_4_43	333.396	0.0551	1.54265	0.488	6.53996	0.06383	3.52499	0.63045		398.8	13.5	403.8	12.5	403	34.5	398.8	13.5
BRK14_4_74	277.603	0.0546	1.73993	0.492	6.52439	0.0642	3.50467	0.023183		401.1	14	405	13	374	38	401.1	14
BRK14_4_21	564.732	0.05578	1.43421	0.483	6.65424	0.06428	3.50031	0.41699		401.6	13.5	399.6	12.5	433	32	401.6	13.5
BRK14_4_63	1024	0.0551	1.36116	0.481	6.7183	0.06463	3.40399	0.51621		403.7	13.5	398.7	12	412	31	403.7	13.5
BRK14_4_15	442.6	0.0557	1.43627	0.495	6.59798	0.06532	3.52113	0.47962		407.8	14	408.6	12.5	436	34	407.8	14
BRK14_4_84	368.096	0.0551	1.54265	0.499	6.56713	0.06554	3.50931	0.40871		409.2	14	411.8	12.5	412	35	409.2	14
BRK14_4_77	756.945	0.05644	1.32884	0.5163	6.34999	0.06557	3.5077	0.52696		409.4	14	422.9	12.5	469	29	409.4	14
BRK14_4_87	539.217	0.0551	1.54265	0.49	6.69898	0.06565	3.57959	0.41973		409.9	14	405.3	12.5	424	34.5	409.9	14
BRK14_4_3	174.523	0.0564	1.95035	0.512	6.44531	0.066	3.56061	0.26417		411.8	14	420	13.5	477	42	411.8	14
BRK14_4_97	690.606	0.0594	1.59933	0.54	6.16481	0.06658	3.52959	0.60891		415.5	14	437	13.5	573	34	415.5	14
BRK14_4_59	605.556	0.0647	1.70015	0.592	5.67736	0.06722	3.49598	-0.0013826		419.3	14.5	471	14.5	762	37.5	419.3	14.5
BRK14_4_91	830.088	0.0561	1.3369	0.5175	6.53333	0.06762	3.54925	0.62221		421.7	14	423.1	12.5	453	29	421.7	14
BRK14_4_92	161.425	0.0554	1.98556	0.523	6.55163	0.06853	3.50212	0.13641		427.2	14.5	426	13.5	405	43.5	427.2	14.5
BRK14_4_26	297.505	0.056	1.51786	0.519	6.60886	0.0686	3.49854	0.4453		427.4	14.5	423.8	13	436	35.5	427.4	14.5
BRK14_4_50	92.7045	0.0526	2.37643	0.501	6.90619	0.0692	3.61272	0.1273		431.3	14.5	412	14	328	50	431.3	14.5
BRK14_4_80	397.694	0.0551	1.54265	0.53	6.53208	0.06924	3.53842	0.21415		431.5	14.5	431.6	13.5	404	35	431.5	14.5
BRK14_4_34	475.259	0.0567	1.5873	0.553	6.42857	0.0711	3.44585	0.57731		442.6	15	448	13.5	464	34.5	442.6	15
BRK14_4_67	68.04	0.06	2.58333	0.597	6.1474	0.0734	3.81471	0.24794		456	16.5	478	15.5	570	55	456	16.5
BRK14_4_69	576.639	0.057	1.40351	0.576	6.36719	0.07335	3.54465	0.40174		456.2	15.5	461.8	13.5	489	32	456.2	15.5
BRK14_4_96	313.494	0.0593	1.51771	0.678	6.15782	0.0835	3.53293	0.59183		517.2	17.5	526.4	15	575	32.5	517.2	17.5
BRK14_4_19	833.49	0.0737	1.35685	0.871	4.99426	0.087	3.56322	0.6711		537.4	18	635.2	17.5	1029	27	537.4	18
BRK14_4_94	219.429	0.0594	1.51515	0.752	6.13032	0.0922	3.52495	0.46269		568.4	19.5	568	16.5	578	32	568.4	19.5
BRK14_4_17	99.5085	0.0635	1.81102	0.924	5.84957	0.1081	3.56152	0.2927		661	22.5	664	19	723	38.5	661	22.5
BRK14_4_68	831.789	0.06383	1.33166	0.939	5.7721	0.1084	3.50554	0.60814		664.1	22	673.6	18	736	27	664.1	22
BRK14_4_7	72.3095	0.0704	1.91761	1.228	5.17101	0.127	3.58268	0.28417		770	26	814	22	943	40	770	26
BRK14_4_33	177.754	0.0706	1.41643	1.65	5.18182	0.171	3.50877	0.5413		1017	32.5	988	23	941	27.5	941	27.5
BRK14_4_13	389.529	0.0716	1.32682	1.568	5.14668	0.1614	3.40768	0.57757		964	31.5	957	23.5	971	27.5	971	27.5
BRK14_4_55	180.646	0.0746	1.40751	1.85	4.93243	0.1825	3.56164	0.56506		1080	35.5	1063	25	1049	29	1049	29
BRK14_4_28	76.7151	0.0749	1.33511	2.054	4.75901	0.1955	2.8133	0.47289		1151	32	1130	27.5	1056	30.5	1056	30.5
BRK14_4_89	291.892	0.0751	1.33156	1.738	4.89643	0.1702	3.52526	0.67822		1013	33	1024	24	1065	27	1065	27
BRK14_4_90	454.847	0.07525	1.26246	1.806	4.88095	0.1763	3.40329	0.60287		1047	34	1047.8	23.5	1074	25.5	1074	25.5
BRK14_4_29	236.099	0.0776	1.35309	1.744	4.70757	0.1642	3.34957	0.38797		980	31	1023	24	1131	27.5	1131	27.5
BRK14_4_76	1241.73	0.08252	1.21183	2.236	4.31351	0.1929	3.62882	0.80702		1137	36.5	1193.4	25	1256	24	1256	24
BRK14_4_71	454.847	0.08248	1.27304	2.171	4.41732	0.1918	3.38895	0.64672		1131	35	1171	25.5	1258	25.5	1258	25.5
BRK14_4_2	218.408	0.0829	1.38721	2.419	4.45019	0.2153	3.48351	0.51606		1257	40.5	1248	25.5	1274	26.5	1274	26.5
BRK14_4_38	518.805	0.0857	1.40023	2.394	4.18129	0.2002	3.4965	0.34598		1178	38	1234	26.5	1317	22.5	1317	22.5
BRK14_4_56	631.071	0.0863	1.27462	2.697	4.24917	0.2292	3.4904	0.72423		1332	41.5	1327	26.5	1342	24.5	1342	24.5
BRK14_4_70	180.476	0.0896	1.39509	2.22	4.00901	0.178	3.37079	0.66243		1056	34	1185	26	1424	27	1424	27
BRK14_4_65	369.117	0.09403	1.22301	3.138	3.93244	0.2468	3.44408	0.77435		1421	45	1442.1	27.5	1510	23.5	1510	23.5
BRK14_4_4	348.705	0.09426	1.22003	3.239	3.89163	0.2521	3.57001	0.67985		1451	46.5	1465.2	28	1514	23.5	1514	23.5
BRK14_4_54	137.101	0.0955	1.3089	3.51	3.82479	0.2685	3.53818	0.60326		1533	48	1529	29	1537	25	1537	25
BRK14_4_22	109.885	0.0963	1.34995	3.657	3.70932	0.2713	3.31736	0.5891		1547	46.5	1562	33	1556	27	1556	27
BRK14_4_10	282.026	0.0962	1.2474	2.954	3.83717	0.2267	3.52889	0.73116		1317	42	1395	28	1557	23	1557	23
BRK14_4_24	290.531	0.0976	1.33197	2.282	3.75986	0.1716	3.4965	0.53948		1021	34	1205	25	1581	25	1581	25
BRK14_4_58	697.58	0.09846	1.26955	2.841	3.65716	0.2078	3.60924	0.81992		1217	39.5	1366.6	27.5	1595	23.5	1595	23.5
BRK14_4_16	250.387	0.1001	1.24875	3.559	3.56982	0.2541	2.95159	0.75227		1459	41.5	1541	29.5	1623	25.5	1623	25.5
BRK14_4_5	128.596	0.1016	1.37795	4.082	3.6612	0.2989	3.51288	0.24616		1685	55	1650	29	1642	23.5	1642	23.5
BRK14_4_45	239.671	0.1017	1.27827	3.85	3.51299	0.2705	3.51201	0.74104		1545	48	1602	29	1652	24	1652	24
BRK14_4_85	364.864	0.10217	1.22345	4.196	3.55696	0.2985	3.51759	0.69711		1684	50	1672	31	1661	23	1661	23
BRK14_4_27	115.328	0.1028	1.31323	4.05	3.53333	0.2862	3.49406	0.68282		1622	50	1646	30	1675	25	1675	25
BRK14_4_42	166.188	0.1074	1.25698	4.58	3.34716	0.3066	3.42466	0.60112		1723	55	1745	30.5	1752	23.5	1752	23.5
BRK14_4_18	354.318	0.11242	1.24533	4.997	3.30598	0.3304	3.48063	0.79233		1839	55	1819	30	1840	23	1840	23
BRK14_4_44	474.239	0.11451	1.2226	5.234	3.11712	0.3263	3.52436	0.79985		1820	55	1856	31	1874	23	1874	23
BRK14_4_75	74.1636	0.1182	1.35364	5.68	3.02201	0.3433	3.49548	0.6704		1901	60	1929	31.5	1929	24.5	1929	24.5
BRK14_4_93	29.5974	0.1215	1.76955	5.59	3.01521	0.3371	3.55977	0.46212		1871	60	1918	31	1968	31.5	1968	31.5
BRK14_4_57	444.811	0.12716	1.21894	5.924	2.86884	0.3399	3.53045	0.80614		1885	60	1964	32	2061	22.5	2061	22.5
BRK14_4_66	242.392	0.1563	1.2476	8.66	2.35277	0.4075	3.55828	0.78767		2203	65	2302	32	2419	20.5	2419	20.5
BRK14_4_83	582.252	0.1622	1.32552	8.35	2.24132	0.3743	3.8739	0.85557		2049	75	2269	55	2480	24.5	2480	24.5
BRK14_4_62	132.338	0.1735	1.26801	11.81	2.12235	0.5013	3.59066	0.63716		2618	75	2588	34.5	2591	20.5	2591	20.5
BRK14_4_51	175.033	0.1766	1.27407	10.81	2.06337	0.4461	3.58664	0.29493		2377	70	2504	33.5	2618	21.5	2618	21.5
BRK14_4_12	124.513	0.2219	1.21676	16.86	1.66459	0.5613	3.56316	0.81365		2870	80	2926	35	2996	19.5	2996	19.5
BRK14-6_Type 2
					Isotopic Ratios							Apparent Ages
Analysis	U	207Pb*	±	207Pb*	±	206Pb*	±	error		206Pb*	±	207Pb*	±	206Pb*	±	Best	±
	(ppm)	206Pb*	(%)	235U	(%)	238U	(%)	corr.		238U	Ma	235U	Ma	207Pb*	Ma	Age†	Ma††
BRK14_6_77	307.03	0.0539	2.04082	0.2358	2.96862	0.03174	2.83554	0.17816		201.4	5.5	214.4	5.5	347	42	201.4	5.5
BRK14_6_18	651.483	0.066	1.36364	0.471	2.54777	0.05269	3.03663	0.29512		331	9.5	391.2	8	784	30	331	9.5
BRK14_6_27	944.055	0.05654	0.972763	0.4391	2.16352	0.05609	2.76342	0.47216		351.8	9.5	369.4	7	472	22	351.8	9.5
BRK14_6_93	527.31	0.0541	1.10906	0.428	2.45327	0.05657	2.82835	0.4688		354.7	9.5	361.8	7.5	377	25.5	354.7	9.5
BRK14_6_53	588.716	0.057	1.31579	0.454	2.42291	0.05731	2.79183	0.24455		359.2	9.5	379.2	7.5	467	26.5	359.2	9.5
BRK14_6_22	1634.66	0.05718	0.848199	0.4538	2.42398	0.05757	2.86608	0.70088		361.4	10	380.3	7.5	498	18.5	361.4	10
BRK14_6_86	236.099	0.0585	1.7094	0.474	2.63713	0.0589	2.71647	0.24219		368.9	10	392	8.5	522	35	368.9	10
BRK14_6_5	37.9833	0.0535	3.83178	0.414	4.10628	0.0588	2.97619	0.067531		369.4	10.5	349	12.5	270	70	369.4	10.5
BRK14_6_65	705.915	0.0663	1.13122	0.534	2.34082	0.0598	2.67559	0.34424		374.4	10	436.4	8	806	23.5	374.4	10
BRK14_6_80	336.458	0.0532	1.31579	0.4413	2.37933	0.06025	2.73859	0.25656		377.1	10	372.2	7.5	324	28.5	377.1	10
BRK14_6_26	251.408	0.0554	2.61733	0.467	3.31906	0.06047	2.81131	0.15348		378.5	10.5	386	10	355	37.5	378.5	10.5
BRK14_6_48	1258.74	0.0641	1.71607	0.533	2.62664	0.06049	2.72772	0.5674		378.6	10	432	9.5	714	33.5	378.6	10
BRK14_6_16	137.101	0.0645	2.48062	0.54	3.05556	0.0611	2.78232	0.058115		382.5	10.5	436	10.5	723	45.5	382.5	10.5
BRK14_6_69	1200.91	0.05475	0.913242	0.4666	2.25032	0.06215	2.73532	0.51151		388.7	10	389	7.5	412	20.5	388.7	10
BRK14_6_66	570.005	0.0587	1.10733	0.507	2.26824	0.0637	2.74725	0.53635		398.3	10.5	415.8	8	551	25.5	398.3	10.5
BRK14_6_49	299.886	0.0622	2.33119	0.552	2.80797	0.064	2.8125	0.432		399.6	11	445	10	683	38.5	399.6	11
BRK14_6_79	268.928	0.0556	1.43885	0.486	2.57202	0.06437	2.79633	0.40811		402.7	10.5	401.1	8.5	431	31.5	402.7	10.5
BRK14_6_84	554.526	0.0643	1.08865	0.591	2.28426	0.06566	2.81754	0.50259		410.4	11	471.7	8.5	765	24	410.4	11
BRK14_6_6	203.61	0.0548	2.0073	0.498	2.81124	0.06637	2.7874	0.1478		414.2	11	408	9.5	368	41	414.2	11
BRK14_6_71	367.586	0.0548	1.27737	0.505	2.37624	0.06663	2.85157	0.15722		415.8	11.5	414.4	8	395	27	415.8	11.5
BRK14_6_12	390.89	0.05442	1.10254	0.4982	2.30831	0.06698	2.76202	0.35225		417.9	11	410.7	7.5	390	24.5	417.9	11
BRK14_6_51	1551.31	0.05573	0.825408	0.5146	2.23475	0.06756	2.73831	0.68325		421.4	11	421.3	7.5	440	18	421.4	11
BRK14_6_30	379.663	0.0553	1.17541	0.521	2.39923	0.06771	2.73224	0.47305		422.3	11.5	426.5	8.5	413	26	422.3	11.5
BRK14_6_75	652.504	0.0574	1.39373	0.53	3.11321	0.0684	2.92398	0.58395		426.5	12	431.4	10.5	494	28	426.5	12
BRK14_6_73	376.942	0.0547	1.27971	0.512	2.34375	0.0685	2.77372	-0.17358		427.1	11.5	419.1	8	397	30	427.1	11.5
BRK14_6_15	218.578	0.0538	1.48699	0.508	2.55906	0.06893	2.75642	0.2005		430.3	11.5	417.2	8.5	354	33.5	430.3	11.5
BRK14_6_87	359.761	0.0556	1.16906	0.537	2.32775	0.0696	2.72989	0.34614		433.7	11.5	437	8.5	432	27.5	433.7	11.5
BRK14_6_36	293.252	0.0567	1.23457	0.547	2.3766	0.07063	2.76087	0.34608		439.9	12	443.1	8.5	474	27	439.9	12
BRK14_6_62	148.497	0.0597	1.75879	0.574	2.70035	0.0707	2.82885	0.34036		440	12	459	10	578	38	440	12
BRK14_6_24	1192.4	0.05771	0.953041	0.562	2.2242	0.07067	2.68855	0.62381		440.2	11.5	456.4	8	512	20	440.2	11.5
BRK14_6_89	307.371	0.0609	1.80624	0.617	2.8363	0.071	2.88732	0.35069		442.3	12.5	488	10.5	622	36.5	442.3	12.5
BRK14_6_19	1410.13	0.05659	0.857042	0.5535	2.25836	0.07135	2.73301	0.67013		444.3	11.5	448.3	8	473	19	444.3	11.5
BRK14_6_8	245.454	0.0561	1.60428	0.554	2.52708	0.07246	2.76014	0.20965		450.9	12	447.5	9	443	33.5	450.9	12
BRK14_6_9	1003.59	0.0638	1.09718	0.641	2.26209	0.07309	2.73635	0.53831		454.7	12	502.2	9	739	24	454.7	12
BRK14_6_61	101.039	0.0568	2.11268	0.581	2.83993	0.0741	2.83401	0.213		460.4	12.5	464	10.5	504	44	460.4	12.5
BRK14_6_13	477.981	0.0657	1.36986	0.675	2.44444	0.0754	2.71883	0.3702		468.7	12.5	522	10	809	29	468.7	12.5
BRK14_6_47	469.476	0.0678	1.25369	0.714	2.38095	0.0763	2.81782	0.52066		473.8	13	547	10	852	26	473.8	13
BRK14_6_3	993.384	0.0681	1.83554	0.861	3.19396	0.0919	2.82916	0.56383		567.5	15.5	621	13	829	29.5	567.5	15.5
BRK14_6_32	498.393	0.0606	1.15512	0.784	2.35969	0.0934	2.78373	0.35968		575.6	15.5	586.6	10.5	615	24.5	575.6	15.5
BRK14_6_78	564.732	0.0639	0.938967	0.937	2.34792	0.1069	2.75959	0.12554		654.7	17.5	670.2	11.5	730	20.5	654.7	17.5
BRK14_6_60	152.41	0.0657	1.36986	1.072	2.47201	0.1198	2.75459	0.23653		729.2	19	737	12.5	790	27.5	729.2	19
BRK14_6_29	409.941	0.0706	0.849858	1.691	2.30633	0.1707	2.72408	0.5587		1016	26	1003	15.5	945	17.5	945	17.5
BRK14_6_74	284.747	0.077	6.49351	1.541	2.33615	0.1601	3.43535	0.95253		954	28	945	14.5	1005	44	1005	44
BRK14_6_23	790.965	0.0747	0.870147	1.753	2.19624	0.1699	2.7369	0.71112		1011	25.5	1027.5	14.5	1059	17	1059	17
BRK14_6_68	2284.44	0.07774	0.707486	1.534	2.21643	0.1457	2.74537	0.83343		877	22.5	944.2	13.5	1140	14.5	1140	14.5
BRK14_6_43	515.403	0.0789	0.95057	1.713	2.59778	0.156	2.85256	0.30379		936	24.5	1009	16.5	1163	19	1163	19
BRK14_6_85	171.631	0.0795	1.00629	2.156	2.31911	0.1942	2.83213	0.67591		1143	29.5	1167	16	1184	20	1184	20
BRK14_6_52	422.869	0.07959	0.879507	2.099	2.23916	0.1904	2.62605	0.66235		1123	28.5	1147	16	1188	16	1188	16
BRK14_6_7	86.5809	0.0824	1.45631	1.925	2.51948	0.1716	2.76807	0.51436		1022	26	1089	17	1256	29	1256	29
BRK14_6_63	83.5191	0.084	1.4881	1.847	2.49053	0.1611	2.88641	0.55674		962	26	1058	16.5	1275	29	1275	29
BRK14_6_91	2704.59	0.08329	0.720375	1.706	2.19812	0.146	2.77397	0.86883		878	23	1011.9	14.5	1278	14.5	1278	14.5
BRK14_6_42	368.266	0.0849	1.06007	2.525	2.37624	0.2145	2.7972	0.58438		1253	31	1278	16	1310	17.5	1310	17.5
BRK14_6_57	319.448	0.0891	0.897868	2.909	2.23444	0.2368	2.74493	0.63253		1371	33.5	1385	16.5	1403	16.5	1403	16.5
BRK14_6_44	707.276	0.08909	0.785722	2.461	2.23486	0.2001	2.74863	0.80941		1175	29.5	1259	17.5	1405	15.5	1405	15.5
BRK14_6_55	204.63	0.0893	1.06383	2.888	2.42382	0.2332	2.78731	0.9315		1350	34.5	1373	18	1406	19.5	1406	19.5
BRK14_6_11	428.652	0.0908	0.825991	3.197	2.18955	0.2584	2.70898	0.57083		1481	36	1455.3	17	1441	16	1441	16
BRK14_6_82	497.372	0.09129	0.821558	3.104	2.25515	0.2449	2.65414	0.63441		1413	35.5	1432	17	1454	15	1454	15
BRK14_6_50	159.384	0.0915	0.928962	3.12	2.24359	0.2438	2.87121	0.64238		1406	35	1437	17.5	1461	18	1461	18
BRK14_6_64	102.23	0.0927	1.13269	3.212	2.33499	0.2551	2.74402	0.58255		1464	36.5	1466	18	1487	21	1487	21
BRK14_6_76	184.729	0.0938	0.959488	3.393	2.3578	0.2666	2.8132	0.24274		1525	36.5	1499	18.5	1499	18	1499	18
BRK14_6_1	337.308	0.0988	0.860324	3.657	2.18759	0.2704	2.77367	0.82878		1542	38	1560	18	1602	15.5	1602	15.5
BRK14_6_88	399.395	0.10033	0.797369	3.846	2.21009	0.2722	2.75533	0.77794		1552	38	1601	17	1628	14.5	1628	14.5
BRK14_6_4	46.6074	0.1019	1.42296	3.918	2.42471	0.2828	2.82885	0.043693		1604	40	1617	19	1644	27.5	1644	27.5
BRK14_6_45	530.712	0.1052	1.04563	3.578	2.23589	0.2457	2.849	0.71632		1416	35.5	1544	19	1713	18.5	1713	18.5
BRK14_6_38	645.359	0.10921	0.732534	3.815	2.22805	0.2532	2.76461	0.78704		1455	35.5	1597	18	1788	13.5	1788	13.5
BRK14_6_17	372.689	0.10939	0.777036	4.553	2.19635	0.3056	2.78141	0.63866		1719	41	1740.6	18	1789	14.5	1789	14.5
BRK14_6_33	172.992	0.1098	0.819672	4.791	2.29597	0.3151	2.85624	0.76565		1767	42.5	1782	19	1797	15.5	1797	15.5
BRK14_6_39	81.9882	0.114	0.964912	4.945	2.22447	0.316	2.68987	0.43165		1769	42.5	1808	19.5	1865	17.5	1865	17.5
BRK14_6_25	1297.86	0.11502	0.739002	3.658	2.18699	0.2292	2.83595	0.46942		1332	33.5	1562	17	1882	12	1882	12
BRK14_6_72	195.445	0.1156	0.865052	5.176	2.31839	0.3271	2.75145	0.60406		1823	43.5	1848	19	1885	16	1885	16
BRK14_6_10	109.885	0.1171	0.982067	5.109	2.25093	0.3209	2.80461	0.55706		1798	43	1835	19	1905	17.5	1905	17.5
BRK14_6_28	541.939	0.1185	0.801688	3.837	2.47589	0.2317	2.80535	0.88405		1343	35.5	1599	23	1934	14	1934	14
BRK14_6_14	185.749	0.128	0.820312	6.584	2.20231	0.3762	2.65816	0.66597		2058	48	2056	19.5	2068	14.5	2068	14.5
BRK14_6_58	127.745	0.1483	0.842886	8.69	2.24396	0.4273	2.80833	0.76193		2292	55	2309	20.5	2325	15	2325	15
BRK14_6_90	165.677	0.1833	0.791053	12.63	2.09818	0.4929	2.73889	0.74424		2582	55	2653	21.5	2680	13	2680	13
BRK14_6_83	158.023	0.1992	0.778112	14.55	2.16495	0.5272	2.75038	0.75		2731	60	2784	21	2818	13	2818	13
BRK14-7A_Type 2
					Isotopic Ratios							Apparent Ages
Analysis	U	207Pb*	±	207Pb*	±	206Pb*	±	error		206Pb*	±	207Pb*	±	206Pb*	±	Best	±
	(ppm)	206Pb*	(%)	235U	(%)	238U	(%)	corr.		238U	Ma	235U	Ma	207Pb*	Ma	Age†	Ma††
BRK14_7A_78	2714.8	0.0517	1.16054	0.1222	2.37316	0.01731	2.74408	0.25808		110.6	3	117	2.6	260	26	110.6	3
BRK14_7A_91	3464.94	0.0547	1.09689	0.1319	2.31236	0.01754	2.7366	0.3526		112.1	3.05	125.7	2.75	394	24.5	112.1	3.05
BRK14_7A_88	2473.25	0.05	1.2	0.1223	2.37122	0.01769	2.74166	0.40578		113	3.05	117.1	2.65	194	26	113	3.05
BRK14_7A_16	1670.38	0.0527	1.13852	0.1286	2.3717	0.01777	2.75746	0.30729		113.6	3.1	122.8	2.75	305	26	113.6	3.1
BRK14_7A_72	2690.98	0.053	1.22642	0.1284	2.41433	0.01787	2.71405	0.14899		114.2	3.05	122.5	2.8	317	27.5	114.2	3.05
BRK14_7A_58	1639.76	0.0477	1.25786	0.12	2.41667	0.01797	2.78242	0.45856		114.8	3.15	115	2.65	87	25.5	114.8	3.15
BRK14_7A_69	1758.83	0.054	1.2963	0.1384	2.45665	0.01891	2.6441	-0.0081171		120.8	3.25	131.5	3	357	29	120.8	3.25
BRK14_7A_60	540.918	0.0509	1.57171	0.1805	2.57618	0.0258	2.71318	0.25095		164.2	4.5	169.3	4	231	34.5	164.2	4.5
BRK14_7A_36	1415.23	0.0642	1.09034	0.4611	2.3856	0.05158	2.81117	0.45601		324.2	8.5	385.2	7.5	736	22.5	324.2	8.5
BRK14_7A_59	767.151	0.0619	1.37318	0.485	2.47423	0.05535	2.80036	0.31503		347.3	9.5	400.2	8	678	30	347.3	9.5
BRK14_7A_57	366.565	0.0582	1.46048	0.451	2.54989	0.05568	2.78376	0.51175		349.3	9.5	377.9	8	518	32.5	349.3	9.5
BRK14_7A_51	769.022	0.0559	1.16279	0.4397	2.27428	0.05629	2.7536	0.27175		353	9.5	369.6	7	441	24	353	9.5
BRK14_7A_20	575.448	0.0639	4.22535	0.508	4.62598	0.05819	2.66369	0.11517		364.6	9.5	416	14.5	735	60	364.6	9.5
BRK14_7A_97	323.87	0.0549	1.36612	0.441	2.49433	0.05822	2.7482	0.28024		364.7	10	370.1	7.5	389	31	364.7	10
BRK14_7A_11	629.37	0.0583	1.20069	0.4679	2.24407	0.05871	2.81042	0.25599		367.7	10	389.3	7.5	535	26.5	367.7	10
BRK14_7A_96	262.634	0.054	1.66667	0.437	2.63158	0.0593	2.78246	0.19732		371.3	10	367.2	8	336	35	371.3	10
BRK14_7A_87	731.43	0.0588	3.23129	0.4878	5.22755	0.06145	2.76648	0.44791		384.4	10.5	403	13	556	42.5	384.4	10.5
BRK14_7A_25	625.968	0.0556	1.07914	0.477	2.4109	0.06278	2.70787	0.1166		392.4	10.5	395.1	7.5	425	25	392.4	10.5
BRK14_7A_27	959.364	0.05901	1.01678	0.5072	2.36593	0.06327	2.6869	0.4945		395.5	10.5	416	8	558	22	395.5	10.5
BRK14_7A_53	1852.39	0.0671	1.93741	0.597	2.51256	0.06388	2.81778	0.56728		399.1	11	475	9.5	824	34	399.1	11
BRK14_7A_18	231.506	0.0548	1.55109	0.494	2.42915	0.06475	2.77992	0.20824		404.4	11	406.8	8.5	378	34	404.4	11
BRK14_7A_5	721.224	0.063	1.98413	0.581	2.83993	0.06547	2.90209	0.41439		408.8	11.5	465.7	10	708	35	408.8	11.5
BRK14_7A_61	249.367	0.0599	1.5025	0.535	2.61682	0.0659	2.80728	0.4914		411.4	11	435	9	585	33.5	411.4	11
BRK14_7A_62	585.144	0.0554	1.08303	0.5015	2.29312	0.06603	2.72603	0.45102		412.1	11	412.2	8	431	24.5	412.1	11
BRK14_7A_28	1122.66	0.06285	0.875099	0.5776	2.25069	0.06692	2.76449	0.56414		417.6	11	463.8	8.5	703	19	417.6	11
BRK14_7A_81	641.787	0.0573	1.22164	0.527	2.37192	0.06704	2.75955	0.16489		418.3	11	429.4	8.5	485	28	418.3	11
BRK14_7A_48	461.311	0.0553	1.17541	0.53	2.35849	0.06787	2.79947	0.52798		423.2	11.5	433.1	8.5	418	27	423.2	11.5
BRK14_7A_8	237.46	0.0564	1.41844	0.529	2.36295	0.0679	2.79823	0.044665		423.3	11.5	430.3	8.5	451	31.5	423.3	11.5
BRK14_7A_92	249.196	0.0562	1.51246	0.529	2.55198	0.0685	2.84672	0.27382		427.1	12	430	9	435	32.5	427.1	12
BRK14_7A_10	1416.93	0.05555	0.837084	0.5309	2.26031	0.06916	2.74725	0.69551		431	11.5	432.1	8	435	19	431	11.5
BRK14_7A_47	489.888	0.057	1.31579	0.551	2.35935	0.06915	2.81996	0.40743		431	12	444.9	8.5	482	28.5	431	12
BRK14_7A_79	692.307	0.05999	0.916819	0.5666	2.20614	0.06941	2.73736	0.37127		432.5	11.5	456	8	596	20.5	432.5	11.5
BRK14_7A_94	310.603	0.057	1.14035	0.589	2.37691	0.07486	2.73845	0.49529		465.3	12.5	469.4	9	481	25	465.3	12.5
BRK14_7A_63	910.035	0.05955	0.839631	0.796	2.26131	0.0974	2.72074	0.84667		598.9	15.5	593.8	10.5	597	18.5	598.9	15.5
BRK14_7A_37	206.671	0.0645	1.16279	0.915	2.51366	0.1004	2.83865	0.55014		617	17	662	12.5	758	26.5	617	17
BRK14_7A_82	634.473	0.0701	1.21255	0.976	2.51025	0.1025	2.78049	0.45601		629.1	16.5	691.1	12.5	931	22	629.1	16.5
BRK14_7A_32	2798.14	0.07888	0.760649	1.378	2.17707	0.1264	2.76899	0.79742		768	19.5	879.6	12.5	1169	15	768	19.5
BRK14_7A_29	343.262	0.0726	0.964187	1.499	2.23482	0.151	2.74834	0.55353		907	23.5	929.1	13.5	1005	18.5	1005	18.5
BRK14_7A_22	208.372	0.073	1.09589	1.647	2.30723	0.1637	2.74893	0.6015		977	25	986	14.5	1024	21	1024	21
BRK14_7A_7	1422.04	0.07371	0.746167	1.502	2.19707	0.1473	2.78344	0.72699		885.7	23	930.6	13	1031	15.5	1031	15.5
BRK14_7A_26	1190.7	0.07543	0.729153	1.54	2.20779	0.1484	2.72911	0.75028		892	23	945.6	14	1083	14.5	1083	14.5
BRK14_7A_49	957.663	0.0791	0.758534	2.128	2.20865	0.1933	2.84532	0.69105		1139	29	1158.1	14.5	1174	14.5	1174	14.5
BRK14_7A_64	148.497	0.0812	1.10837	2.1	2.38095	0.1885	2.65252	0.56992		1115	28.5	1146	16.5	1228	20.5	1228	20.5
BRK14_7A_41	124.853	0.0816	1.59314	1.91	2.6178	0.1683	2.82234	0.4672		1002	26.5	1085	16	1236	31.5	1236	31.5
BRK14_7A_66	427.801	0.0821	0.791717	2.334	2.14225	0.2102	2.61656	0.74214		1229	30.5	1222.7	16.5	1245	16	1245	16
BRK14_7A_34	287.299	0.0872	0.917431	2.519	2.18341	0.2122	2.82752	0.61653		1240	31.5	1276	16.5	1368	17.5	1368	17.5
BRK14_7A_6	621.715	0.0903	0.775194	3.01	2.15947	0.2383	2.72765	0.76407		1379	34.5	1411.5	17	1433	14	1433	14
BRK14_7A_90	878.226	0.09077	0.77118	2.506	2.19473	0.1982	2.77497	0.82097		1165	29.5	1273	16.5	1440	14.5	1440	14.5
BRK14_7A_68	101.55	0.0932	1.23391	2.763	2.53348	0.2178	2.75482	0.50436		1270	31.5	1341	18.5	1490	23	1490	23
BRK14_7A_80	621.205	0.09443	0.794239	3.304	2.26998	0.2558	2.73651	0.61264		1468	35.5	1481	16.5	1517	14.5	1517	14.5
BRK14_7A_9	155.471	0.1013	0.88845	3.988	2.25677	0.2837	2.81988	0.69855		1610	39.5	1630	18.5	1650	16	1650	16
BRK14_7A_85	886.221	0.1027	0.925024	3.099	2.90416	0.2162	3.00648	0.7475		1262	34.5	1434	27.5	1672	17.5	1672	17.5
BRK14_7A_70	1462.86	0.10287	0.729076	2.555	2.93542	0.1847	3.24851	0.83415		1093	33.5	1287	19.5	1679	13.5	1679	13.5
BRK14_7A_3	369.627	0.1091	0.779102	4.367	2.17541	0.2895	2.76339	0.72624		1641	40	1706	18.5	1782	14.5	1782	14.5
BRK14_7A_21	68.074	0.1117	1.07431	4.947	2.32464	0.3204	2.80899	0.19153		1791	44	1807	19.5	1818	19.5	1818	19.5
BRK14_7A_45	134.039	0.1121	0.892061	4.959	2.21819	0.3178	2.83197	0.70639		1778	43.5	1812	19.5	1833	16	1833	16
BRK14_7A_95	99.3384	0.1126	1.06572	4.99	2.30461	0.324	2.77778	0.36486		1811	45	1813	20	1834	19	1834	19
BRK14_7A_43	262.975	0.112	0.803571	5.057	2.1752	0.3215	2.79938	0.613		1797	43.5	1827	19	1835	15	1835	15
BRK14_7A_52	353.978	0.114	0.789474	4.639	2.26342	0.2915	2.74443	0.81879		1650	40.5	1758	19	1862	14	1862	14
BRK14_7A_83	123.152	0.1144	0.961538	5.082	2.26289	0.3254	2.76583	0.689		1815	44	1830	20	1866	17	1866	17
BRK14_7A_56	382.725	0.11719	0.767984	4.84	2.16942	0.2986	2.84662	0.79797		1683	41.5	1792	19	1914	13.5	1914	13.5
BRK14_7A_1	147.987	0.1177	1.06202	5.15	2.91262	0.3151	3.33228	0.74257		1765	55	1841	32.5	1917	19	1917	19
BRK14_7A_13	186.6	0.1206	0.870647	5.326	2.2531	0.3225	2.7907	0.6387		1801	43	1873	19	1963	15.5	1963	15.5
BRK14_7A_76	211.774	0.1373	1.85725	5.23	2.77247	0.2786	3.40991	0.88778		1582	50	1853	26	2194	27.5	2194	27.5
BRK14_7A_23	101.38	0.1469	0.850919	8.25	2.24242	0.4076	2.82139	0.63321		2203	50	2258	20	2307	15	2307	15
BRK14_7A_67	462.842	0.1482	0.74224	6.85	2.62774	0.3337	2.69703	0.7882		1855	46.5	2092	29.5	2327	14	2327	14
BRK14_7A_42	239.501	0.156	0.769231	9.041	2.21214	0.417	2.75779	0.38677		2246	50	2342	20	2413	13.5	2413	13.5
BRK14_7A_40	189.491	0.1785	0.896359	9.52	2.31092	0.3834	2.86907	0.42113		2091	50	2386	19.5	2636	14.5	2636	14.5
BRK14_7A_50	113.116	0.1855	1.07817	11.45	3.18777	0.4384	3.42153	0.58199		2343	75	2559	48.5	2700	21	2700	21
BRNF15-58A_Type 2
					Isotopic Ratios							Apparent Ages
Analysis	U	207Pb*	±	207Pb*	±	206Pb*	±	error		206Pb*	±	207Pb*	±	206Pb*	±	Best	±
	(ppm)	206Pb*	(%)	235U	(%)	238U	(%)	corr.		238U	Ma	235U	Ma	207Pb*	Ma	Age†	Ma††
BRNF15_58A_39	672.235	0.0547	3.93053	0.1315	4.94297	0.01789	3.07434	0.12844		114.3	3.35	128.1	6	390	80	114.3	3.35
BRNF15_58A_48	647.401	0.0502	1.99203	0.1797	3.3389	0.0257	2.72374	0.032874		163.6	4.55	167.6	5	194	42	163.6	4.55
BRNF15_58A_25	474.579	0.0512	2.05078	0.1874	3.46852	0.0267	2.80899	0.14028		169.8	4.7	173.9	5.5	241	41	169.8	4.7
BRNF15_58A_91	106.925	0.0503	3.08151	0.218	3.89908	0.03129	3.03611	-0.0057359		198.6	6	200.1	7	200	55	198.6	6
BRNF15_58A_28	101.89	0.0548	2.82847	0.247	3.84615	0.03246	2.92668	0.11528		205.9	6	223.4	8	390	60	205.9	6
BRNF15_58A_96	608.958	0.05756	1.65045	0.4583	3.16387	0.05745	2.87206	0.52142		360	10	382.7	10	514	36	360	10
BRNF15_58A_75	182.857	0.0549	3.09654	0.445	3.93258	0.0589	2.88625	0.1666		368.7	10.5	374	12	400	65	368.7	10.5
BRNF15_58A_38	319.788	0.055	1.90909	0.441	3.28798	0.05906	2.87843	0.2384		369.8	10.5	370.1	10	402	41.5	369.8	10.5
BRNF15_58A_64	440.899	0.0536	1.77239	0.4377	3.19854	0.05922	2.78622	0.13004		370.8	10	367.8	10	338	38.5	370.8	10
BRNF15_58A_92	515.403	0.05824	1.63118	0.4777	3.14005	0.05971	2.84709	0.49531		373.8	10.5	396.5	10	539	35.5	373.8	10.5
BRNF15_58A_58	398.034	0.05526	1.62866	0.457	3.17287	0.06022	2.82298	0.40515		376.9	10	382.7	9.5	414	36	376.9	10
BRNF15_58A_45	2633.15	0.05478	1.46039	0.4572	3.06212	0.06037	2.73315	0.6932		377.9	10	382.5	9.5	401	33	377.9	10
BRNF15_58A_40	784.161	0.05499	1.63666	0.4537	3.08574	0.06053	2.80852	0.43201		378.8	10.5	379.4	10	406	36	378.8	10.5
BRNF15_58A_69	822.944	0.05644	1.59461	0.474	3.16456	0.06066	2.80251	0.15751		379.6	10.5	393.5	10	459	36.5	379.6	10.5
BRNF15_58A_59	352.957	0.054	1.66667	0.4513	3.21294	0.06131	2.77279	0.44542		383.6	10.5	378.6	10	363	38	383.6	10.5
BRNF15_58A_30	736.533	0.05455	1.5582	0.4588	3.05144	0.06152	2.76333	0.48959		384.8	10.5	383.5	10	401	34.5	384.8	10.5
BRNF15_58A_73	780.759	0.05452	1.55906	0.4774	3.14202	0.06241	2.80404	0.40561		390.2	10.5	397.2	10	398	37	390.2	10.5
BRNF15_58A_99	218.238	0.0528	1.79924	0.462	3.24675	0.06269	2.79151	0.25516		391.9	10.5	384.8	10	316	40.5	391.9	10.5
BRNF15_58A_87	359.251	0.0554	1.62455	0.4725	3.06878	0.06273	2.78973	0.40578		392.2	10.5	392.3	10	426	36.5	392.2	10.5
BRNF15_58A_66	1422.04	0.05468	1.46306	0.4739	3.05972	0.06283	2.78529	0.73792		392.8	10.5	393.6	10	397	34	392.8	10.5
BRNF15_58A_20	352.107	0.0578	1.98962	0.512	3.32031	0.063	2.85714	0.46918		393.6	11	419.2	11.5	502	44	393.6	11
BRNF15_58A_17	723.946	0.0558	1.79211	0.4946	3.13385	0.06365	2.74941	0.17614		397.7	10.5	407.4	10.5	421	33	397.7	10.5
BRNF15_58A_84	247.155	0.0546	1.73993	0.4745	3.16122	0.06404	2.81074	0.35155		400.1	11	394.2	10.5	393	38.5	400.1	11
BRNF15_58A_52	196.636	0.0554	1.89531	0.495	3.23232	0.06427	2.80068	0.17982		401.5	11	406.9	11	420	39.5	401.5	11
BRNF15_58A_14	1908.52	0.05816	1.54746	0.5206	3.07338	0.06459	2.78681	0.60088		403.4	11	426.5	10.5	539	33.5	403.4	11
BRNF15_58A_9	558.438	0.0554	1.7148	0.485	3.19588	0.06466	2.86112	0.23113		403.9	11	401.9	11	422	39	403.9	11
BRNF15_58A_79	134.719	0.0562	2.2242	0.504	3.37302	0.0651	2.84178	0.2309		406.3	11	414	11.5	420	47	406.3	11
BRNF15_58A_94	186.6	0.0552	1.81159	0.506	3.16206	0.06541	2.82831	0.27102		408.4	11	415.8	11	412	40.5	408.4	11
BRNF15_58A_77	389.019	0.05569	1.70587	0.5118	3.12622	0.0658	2.81155	0.26856		410.8	11	419.6	10.5	438	37.5	410.8	11
BRNF15_58A_60	260.423	0.0566	1.94346	0.521	3.35893	0.06583	2.81027	0.16854		410.9	11.5	425.5	11	459	41	410.9	11.5
BRNF15_58A_15	523.908	0.05579	1.61319	0.5063	3.06143	0.06608	2.79964	0.41556		412.5	11	417	10.5	448	35.5	412.5	11
BRNF15_58A_2	537.006	0.05603	1.60628	0.5094	3.14095	0.06707	2.75831	0.50699		418.4	11.5	417.5	10.5	452	36.5	418.4	11.5
BRNF15_58A_53	375.751	0.0545	1.83486	0.515	3.20388	0.06726	2.82486	-0.019058		419.6	11.5	420.7	11	388	35.5	419.6	11.5
BRNF15_58A_81	370.818	0.055	1.72727	0.517	3.09478	0.06887	2.75882	0.36753		429.3	11.5	423.1	11	405	38.5	429.3	11.5
BRNF15_58A_35	440.559	0.0613	1.79445	0.578	3.20069	0.06899	2.8265	0.31245		430	11.5	463.3	12	641	39	430	11.5
BRNF15_58A_65	310.943	0.0573	1.7452	0.552	3.17029	0.06932	2.81304	0.25448		432	11.5	445.6	11.5	506	39.5	432	11.5
BRNF15_58A_12	653.184	0.05818	1.63286	0.553	3.16456	0.0694	2.88184	0.74973		433.6	12	447.7	11	539	34	433.6	12
BRNF15_58A_33	824.985	0.0677	1.92024	0.655	3.35878	0.07074	2.82725	0.50663		440.6	12	509	13	808	34	440.6	12
BRNF15_58A_13	467.775	0.0576	1.90972	0.571	3.3275	0.0722	2.90859	0.4982		449.4	12.5	458	12	512	41	449.4	12.5
BRNF15_58A_98	182.857	0.0676	2.73669	0.687	3.85735	0.07278	2.81671	0.19932		452.8	12.5	526	15.5	782	55	452.8	12.5
BRNF15_58A_62	1063.12	0.0686	2.25948	0.701	3.49501	0.07307	2.80553	0.17223		454.6	12	537	14	851	41.5	454.6	12
BRNF15_58A_36	865.809	0.05495	1.54686	0.5567	3.05371	0.07429	2.75946	0.51387		461.9	12.5	449	11	421	35	461.9	12.5
BRNF15_58A_22	171.801	0.0572	2.0979	0.595	3.44538	0.0744	2.88978	0.18561		463.6	12.5	472	13	472	45.5	463.6	12.5
BRNF15_58A_83	1831.98	0.06272	1.51467	0.669	3.06428	0.0779	2.82413	0.69573		483.3	13	519.8	12.5	698	33.5	483.3	13
BRNF15_58A_67	366.736	0.0667	2.02399	0.742	3.30189	0.0797	2.88582	0.21438		494.5	13.5	562	14	809	40.5	494.5	13.5
BRNF15_58A_47	146.456	0.0591	2.36887	0.665	3.45865	0.081	2.90123	0.15047		502.2	14	516	14	547	49	502.2	14
BRNF15_58A_3	211.945	0.0539	2.04082	0.606	3.46535	0.0816	2.8799	0.43168		505.5	14	482	12.5	360	44	505.5	14
BRNF15_58A_71	436.987	0.0613	2.52855	0.738	3.11653	0.08818	2.77841	0.030705		544.7	14.5	560.1	13.5	595	20	544.7	14.5
BRNF15_58A_49	216.877	0.0579	1.89983	0.746	3.28418	0.0927	2.80475	-0.0011712		571.3	15.5	564	14	506	39.5	571.3	15.5
BRNF15_58A_44	320.298	0.06173	1.61996	0.945	3.12169	0.1102	2.81307	0.45718		674	18	674.6	15	661	34.5	674	18
BRNF15_58A_90	546.021	0.07455	1.54259	1.43	3.07692	0.1391	2.80374	0.349317		840.8	22.5	901.5	18	1052	31	840.8	22.5
BRNF15_58A_82	404.498	0.0722	1.52355	1.49	3.08725	0.1511	2.77962	0.6954		907	23.5	926.3	18.5	988	31.5	907	23.5
BRNF15_58A_37	411.302	0.07051	1.48915	1.516	3.06728	0.1587	2.77253	0.67701		949.4	24	936.8	19	942	31	949.4	24
BRNF15_58A_95	88.537	0.0744	1.68011	1.642	3.34957	0.1591	2.89126	0.60272		951	25	985	20	1049	33.5	951	25
BRNF15_58A_24	285.088	0.078	1.60256	1.752	3.13927	0.162	2.83951	0.68349		967	25.5	1026	20.5	1147	31.5	967	25.5
BRNF15_58A_80	277.773	0.07138	1.54105	1.625	3.07692	0.1652	2.7845	0.54699		985.5	25.5	979.7	19	968	32	968	32
BRNF15_58A_55	258.382	0.0815	1.71779	1.838	3.26442	0.164	2.86585	0.35952		980	25.5	1057	21	1225	33	980	25.5
BRNF15_58A_97	110.905	0.0739	1.69147	1.708	3.22014	0.167	2.78443	0.41531		995	26	1015	19.5	1039	34	995	26
BRNF15_58A_32	174.352	0.0736	1.63043	1.782	3.08642	0.1778	2.81215	0.57423		1055	27.5	1038	20.5	1031	32.5	1055	27.5
BRNF15_58A_50	50.2475	0.0744	1.94892	1.84	3.26087	0.1794	2.78707	0.23746		1063	27.5	1060	21.5	1040	38.5	1063	27.5
BRNF15_58A_93	240.691	0.0741	1.55196	1.829	3.00711	0.1796	2.78396	0.5308		1065	27.5	1056.3	20	1036	32.5	1065	27.5
BRNF15_58A_76	152.58	0.0761	1.57687	1.919	3.12663	0.1812	2.75938	0.039041		1073	28	1085	21	1087	32.5	1073	28
BRNF15_58A_11	145.265	0.0765	1.69935	1.933	3.10398	0.1836	2.72331	0.658		1086	28.5	1089	21.5	1107	34.5	1086	28.5
BRNF15_58A_51	387.148	0.0769	1.49545	2.011	2.98359	0.1868	2.67666	0.52516		1104	28.5	1118.9	20	1117	29.5	1104	28.5
BRNF15_58A_16	230.485	0.0808	1.67079	2.211	3.16599	0.1987	2.76799	0.5867		1168	30	1181	20.5	1208	31	1168	30
BRNF15_58A_46	122.472	0.0776	1.61082	2.213	3.16313	0.2036	2.70138	0.4551		1194	30.5	1186	21.5	1145	31	1194	30.5
BRNF15_58A_7	98.641	0.0778	1.86375	2.194	3.19052	0.208	2.88462	0.44771		1218	31.5	1182	22.5	1138	37	1218	31.5
BRNF15_58A_56	211.264	0.0872	1.49083	2.515	2.98211	0.2084	2.87908	0.67592		1220	31	1274.8	22	1364	30	1364	30
BRNF15_58A_61	102.57	0.0902	1.66297	2.939	3.06227	0.237	2.74262	0.48169		1371	34.5	1389	23.5	1419	31.5	1419	31.5
BRNF15_58A_23	170.61	0.09345	1.55163	3.346	2.98864	0.2587	2.70584	0.592		1483	37	1492	24.5	1496	29	1496	29
BRNF15_58A_43	937.251	0.09986	1.5021	3.034	3.13118	0.223	2.9148	0.43848		1297	33	1417	22.5	1619	27.5	1619	27.5
BRNF15_58A_86	174.863	0.1006	1.54076	4.164	3.00192	0.3049	2.7878	0.34984		1715	42	1669	23.5	1630	27	1630	27
BRNF15_58A_8	289.17	0.10185	1.47275	4.142	3.01787	0.3014	2.82017	0.74881		1697	41.5	1661	25	1657	27.5	1657	27.5
BRNF15_58A_18	269.098	0.10264	1.51013	4.327	3.00439	0.3012	2.82205	0.68122		1697	41.5	1700	25	1675	26.5	1675	26.5
BRNF15_58A_27	179.796	0.1044	1.58046	4.94	3.23887	0.3458	2.89184	0.84804		1913	48	1806	27.5	1700	29	1700	29
BRNF15_58A_34	454.167	0.1097	1.45852	4.374	3.08642	0.2933	2.72758	0.78557		1657	40.5	1708.2	25	1794	27	1794	27
BRNF15_58A_57	55.2315	0.1117	1.61146	5.16	3.10078	0.3343	2.84176	0.54778		1858	45.5	1843	26.5	1817	29.5	1817	29.5
BRNF15_58A_41	172.311	0.12	3.95833	4.25	4.94118	0.2581	2.90585	0.44601		1479	37.5	1635	30.5	1818	47	1818	47
BRNF15_58A_5	152.75	0.1118	1.52057	4.92	3.15041	0.3245	2.92758	0.86912		1809	46	1805	27	1825	27.5	1825	27.5
BRNF15_58A_72	329.994	0.1122	1.51515	5.027	3.08335	0.3197	2.81514	0.75413		1788	43.5	1823.5	25.5	1836	26.5	1836	26.5
BRNF15_58A_19	138.802	0.1126	1.55417	4.99	3.10621	0.3185	2.82575	0.71428		1781	44	1821	26	1841	28	1841	28
BRNF15_58A_63	232.186	0.1132	1.59011	4.268	3.04592	0.2725	2.75229	0.67072		1553	39	1686	25.5	1848	28.5	1848	28.5
BRNF15_58A_26	472.198	0.11361	1.49635	4.65	3.11828	0.2965	2.86678	0.90053		1673	41	1761	27.5	1856	26.5	1856	26.5
BRNF15_58A_78	270.289	0.1141	1.48992	5.382	3.06577	0.3398	2.79576	0.65881		1890	45	1881.5	25.5	1864	26	1864	26
BRNF15_58A_10	219.429	0.1167	1.49957	4.669	3.10559	0.2921	2.90996	0.83766		1651	41	1761	26.5	1909	28	1909	28
BRNF15_58A_4	372.009	0.11697	1.49611	5.213	3.06925	0.3293	2.73307	0.76619		1834	44.5	1854.3	25.5	1911	27	1911	27
BRNF15_58A_42	101.38	0.1176	1.57313	5.86	3.157	0.363	2.75482	0.70299		1995	48	1951	26.5	1913	28	1913	28
BRNF15_58A_74	51.3702	0.1177	1.65675	5.86	3.157	0.3579	2.79408	0.34655		1971	48	1950	26	1916	28.5	1916	28.5
BRNF15_58A_1	74.844	0.1303	1.65004	7.39	3.24763	0.4172	2.87632	0.79067		2246	55	2155	29	2099	29	2099	29
BRNF15_58A_54	47.9172	0.1365	1.61172	8.05	3.1677	0.4225	2.84024	0.58057		2272	55	2234	28	2189	28	2189	28
BRNF15_58A_29	60.3855	0.1405	1.60142	8.18	3.11736	0.4274	2.80767	0.64335		2292	55	2249	29	2241	27.5	2241	27.5
BRNF15_58A_68	359.081	0.17193	1.45408	10.34	3.04642	0.4343	2.76307	0.65445		2326	55	2464.6	27.5	2575.5	24.5	2575.5	24.5
BRNF15_58A_85	226.063	0.1755	1.45299	11.9	3.02521	0.5005	2.7972	0.84767		2617	60	2595.6	28.5	2611.6	24.5	2611.6	24.5
BRNF15_58A_88	185.239	0.1883	1.48699	12.13	3.05029	0.4723	2.75249	-0.12916		2493	60	2611	29.5	2725	24.5	2725	24.5
BRNF15-59_Type 2
					Isotopic Ratios							Apparent Ages
Analysis	U	207Pb*	±	207Pb*	±	206Pb*	±	error		206Pb*	±	207Pb*	±	206Pb*	±	Best	±
	(ppm)	206Pb*	(%)	235U	(%)	238U	(%)	corr.		238U	Ma	235U	Ma	207Pb*	Ma	Age†	Ma††
BRNF15_59_93	2558.3	0.0509	1.57171	0.2146	3.02889	0.03102	2.74017	0.48706		196.9	5.5	197.3	5.5	234	34.5	196.9	5.5
BRNF15_59_37	145.946	0.0509	2.4558	0.2101	3.56973	0.03143	2.86351	0.15837		199.5	5.5	193.5	6	236	50	199.5	5.5
BRNF15_59_41	119.07	0.0501	3.19361	0.225	4	0.03272	2.90342	-0.06751		207.5	6	207.4	7	190	60	207.5	6
BRNF15_59_20	807.975	0.0644	1.86335	0.445	3.25843	0.0496	2.82258	0.51216		312	8.5	373.2	10	741	38.5	312	8.5
BRNF15_59_90	529.181	0.06	1.83333	0.436	3.21101	0.05296	2.83233	0.61858		332.6	9	367	10	596	41	332.6	9
BRNF15_59_24	562.691	0.05522	1.62984	0.4772	3.03856	0.06144	2.76693	0.14724		384.3	10.5	395.6	10	406	36.5	384.3	10.5
BRNF15_59_44	359.932	0.0536	1.77239	0.4459	3.13972	0.06188	2.82805	0.33222		387	10.5	373.5	9.5	345	36	387	10.5
BRNF15_59_72	368.266	0.0663	1.80995	0.573	3.22862	0.06221	2.81305	0.52176		389	10.5	458	12	817	37	389	10.5
BRNF15_59_49	442.6	0.0651	1.68971	0.5566	3.05426	0.06251	2.79955	0.27103		390.8	10.5	449.3	11	781	36	390.8	10.5
BRNF15_59_46	785.862	0.05814	1.63399	0.5056	3.16456	0.06326	2.8454	0.44959		395.4	11	415	10.5	534	37.5	395.4	11
BRNF15_59_85	289	0.0548	1.82482	0.476	3.2563	0.06399	2.81294	0.1052		399.8	11	394.5	10.5	388	38	399.8	11
BRNF15_59_59	2053.11	0.05842	1.54057	0.518	2.99228	0.06444	2.7933	0.52491		402.5	11	423.5	10.5	546	33	402.5	11
BRNF15_59_12	821.583	0.05475	1.55251	0.4938	3.13892	0.06531	2.75609	0.16929		408.2	11	406.8	10.5	392	35	408.2	11
BRNF15_59_31	976.374	0.05683	1.58367	0.5088	3.04638	0.06569	2.81626	0.56924		410.1	11	417.7	10.5	487	34.5	410.1	11
BRNF15_59_96	281.345	0.0564	1.8617	0.511	3.32681	0.06693	2.83879	0.37614		417.6	11.5	420.6	11	457	41.5	417.6	11.5
BRNF15_59_48	438.518	0.05555	1.62016	0.512	3.125	0.06757	2.8119	0.32803		421.4	11.5	419.7	11	420	37	421.4	11.5
BRNF15_59_84	617.463	0.05481	1.64204	0.5047	3.07113	0.06795	2.79617	0.57465		423.7	11.5	414.3	10.5	407	36.5	423.7	11.5
BRNF15_59_89	501.795	0.05536	1.62572	0.5124	3.12256	0.06798	2.79494	0.47602		423.9	11.5	420	10.5	419	35.5	423.9	11.5
BRNF15_59_50	439.368	0.05523	1.53902	0.5167	3.09657	0.06802	2.7933	0.52898		424.1	11.5	423.5	10.5	420	36.5	424.1	11.5
BRNF15_59_25	393.781	0.0559	1.78891	0.5358	3.07951	0.06808	2.79083	-0.018625		424.5	11.5	434.9	11	448	29.5	424.5	11.5
BRNF15_59_81	799.47	0.05561	1.5285	0.5157	3.10258	0.06835	2.77981	0.51548		426.2	11.5	421.8	11	442	35	426.2	11.5
BRNF15_59_60	580.041	0.05595	1.60858	0.5298	3.11438	0.06845	2.77575	0.4734		426.8	11.5	431.7	10.5	452	35.5	426.8	11.5
BRNF15_59_1	642.978	0.056	1.69643	0.533	3.18949	0.0686	2.84257	0.7383		427.9	12	433.2	11.5	450	38	427.9	12
BRNF15_59_34	517.104	0.05622	1.60085	0.5318	3.10267	0.06927	2.81507	0.44886		432.1	11.5	433.7	11	453	37.5	432.1	11.5
BRNF15_59_43	123.493	0.0565	2.21239	0.532	3.38346	0.0694	2.8098	-0.059552		432.3	12	430	12	429	43.5	432.3	12
BRNF15_59_75	479.682	0.05807	1.63596	0.5472	3.10673	0.06955	2.80374	0.40017		433.4	11.5	443.1	11	527	35.5	433.4	11.5
BRNF15_59_58	102.57	0.0554	2.16606	0.531	3.29567	0.0698	2.86533	-0.028419		434.7	12	433	11.5	414	46	434.7	12
BRNF15_59_57	479.172	0.0565	2.38938	0.55	3.54545	0.07028	2.77462	0.019831		437.8	12	443	10	438	32	437.8	12
BRNF15_59_66	404.498	0.0548	1.73358	0.539	3.15399	0.07021	2.77738	0.53715		438	11.5	437.9	11.5	407	37.5	438	11.5
BRNF15_59_74	417.425	0.05849	1.62421	0.5596	3.12723	0.07055	2.764	0.23736		439.4	12	451.9	11	541	35.5	439.4	12
BRNF15_59_67	142.544	0.0569	1.84534	0.561	3.20856	0.07069	2.82925	0.24926		440.2	12	451.5	11.5	474	40.5	440.2	12
BRNF15_59_76	780.759	0.0686	1.89504	0.663	3.31825	0.07083	2.75307	0.26948		441.1	12	516	13.5	880	38.5	441.1	12
BRNF15_59_55	169.692	0.0553	1.7179	0.551	3.17604	0.07188	2.78242	0.38538		447.4	12	445.3	11.5	420	40.5	447.4	12
BRNF15_59_8	441.239	0.05641	1.6841	0.563	3.10835	0.07247	2.82876	0.37975		451.4	12	452.9	11.5	463	35.5	451.4	12
BRNF15_59_70	390.209	0.05632	1.68679	0.5621	3.11333	0.07255	2.75672	0.039957		451.4	12	452.2	11.5	450	36.5	451.4	12
BRNF15_59_45	612.36	0.0554	1.80505	0.548	3.28467	0.0735	2.85714	0.40625		457	12.5	443	12	423	38	457	12.5
BRNF15_59_79	908.334	0.05706	1.48966	0.5939	3.03081	0.07696	2.79366	0.60969		477.9	13	473.9	11.5	493	33	477.9	13
BRNF15_59_36	189.321	0.058	1.89655	0.613	3.26264	0.07815	2.8151	0.35819		486.1	13	487.5	12.5	521	42	486.1	13
BRNF15_59_22	461.992	0.0601	1.83028	0.688	3.27035	0.0816	2.81863	0.53945		505.7	14	530	13.5	607	40.5	505.7	14
BRNF15_59_95	211.094	0.0612	2.12418	0.687	3.42067	0.082	2.86585	0.1564		508.1	14	530	14	650	42	508.1	14
BRNF15_59_63	77.7357	0.0583	2.31561	0.703	3.55619	0.0881	2.83768	0.12959		543.8	15	539	14	488	49.5	543.8	15
BRNF15_59_3	251.068	0.0594	1.85185	0.731	3.21477	0.0887	2.81849	0.37249		547.9	15	556	14	580	40.5	547.9	15
BRNF15_59_15	113.457	0.0601	1.99667	0.764	3.3377	0.0923	2.87107	0.35641		569	15.5	575	14.5	574	43	569	15.5
BRNF15_59_35	600.113	0.06381	1.56715	0.843	3.08422	0.09656	2.79619	0.66847		594.2	16	620.7	14	732	32.5	594.2	16
BRNF15_59_61	387.318	0.0614	1.7101	0.838	3.16229	0.0987	2.83688	0.45633		606.5	16.5	617.4	14.5	653	37.5	606.5	16.5
BRNF15_59_42	384.596	0.06019	1.57834	0.808	3.09406	0.0998	2.80561	0.48377		613.8	16.5	601.9	14	616	35.5	613.8	16.5
BRNF15_59_7	770.553	0.07519	1.52946	1.521	3.02433	0.1455	2.78351	0.64463		875.8	23	938.7	18.5	1073	30.5	875.8	23
BRNF15_59_21	420.317	0.07145	1.53954	1.567	3.06318	0.1563	2.78311	0.70313		936.1	24	957	19	968	31	936.1	24
BRNF15_59_17	714.42	0.07136	1.47141	1.587	3.02457	0.1601	2.77951	0.68224		957.4	24.5	964.4	19	969	30	957.4	24.5
BRNF15_59_19	425.08	0.07167	1.53481	1.628	3.04054	0.1621	2.77606	0.16482		968.4	25	979.6	19	970	31.5	968.4	25
BRNF15_59_27	326.422	0.07339	1.56697	1.765	3.11615	0.1721	2.78908	0.51551		1023.5	26.5	1032.4	19.5	1023	31.5	1023.5	26.5
BRNF15_59_68	250.047	0.0744	1.68011	1.791	3.07091	0.176	2.8125	0.64248		1045	27	1040	20.5	1046	34.5	1045	27
BRNF15_59_73	151.729	0.0696	1.72414	1.715	3.207	0.1805	2.77008	0.55048		1069	28	1012	20	914	34	1069	28
BRNF15_59_91	167.038	0.0768	1.5625	1.936	3.09917	0.1852	2.69978	0.46482		1096	28	1092.9	21	1112	32	1096	28
BRNF15_59_30	862.407	0.07842	1.46646	2.26	3.09735	0.2101	2.85578	0.759		1228.9	31	1199.6	21.5	1157	29	1157	29
BRNF15_59_9	412.152	0.07887	1.52149	2.139	3.0388	0.1965	2.79898	0.70697		1158	29.5	1161.3	21.5	1174	30	1174	30
BRNF15_59_86	295.974	0.0774	1.61499	2.117	3.07038	0.2016	2.72817	0.56719		1185	31	1153	21.5	1138	30	1185	31
BRNF15_59_65	205.481	0.0851	1.58637	2.613	3.06162	0.2236	2.68336	0.42178		1301	33	1301	22	1310	30.5	1310	30.5
BRNF15_59_10	417.936	0.08601	1.51145	2.747	3.09428	0.2303	2.82241	0.63174		1336	33.5	1340.7	22.5	1341	29	1341	29
BRNF15_59_6	94.2354	0.0907	1.59868	3.253	3.07409	0.257	2.72374	0.5558		1474	37	1471	24	1447	29.5	1447	29.5
BRNF15_59_28	490.398	0.09152	1.47509	3.044	2.95664	0.2398	2.71059	0.72547		1385	34.5	1418.2	23	1458	27.5	1458	27.5
BRNF15_59_64	287.809	0.09301	1.50521	3.491	3.00773	0.2708	2.76957	0.6646		1546	37.5	1525.4	24	1486	29	1486	29
BRNF15_59_29	244.774	0.09301	1.50521	3.258	3.06937	0.2537	2.75916	0.61094		1457	36.5	1470.8	23.5	1489	29	1489	29
BRNF15_59_56	287.809	0.09411	1.48762	3.576	3.07606	0.2745	2.73224	0.77809		1566	39	1543	24.5	1511	28	1511	28
BRNF15_59_39	166.698	0.0994	1.50905	3.853	2.98469	0.2887	2.77104	0.55764		1636	40.5	1604.7	24.5	1614	28.5	1614	28.5
BRNF15_59_23	241.372	0.10365	1.49542	4.485	3.01003	0.3073	2.76603	0.7776		1727	42.5	1728	26	1688	28	1688	28
BRNF15_59_83	273.181	0.10418	1.48781	4.514	3.10146	0.3196	2.81602	0.74235		1791	42.5	1732	25.5	1697	28	1697	28
BRNF15_59_26	501.795	0.1043	1.53404	3.036	3.12912	0.2081	2.88323	0.76953		1218	32	1415	24	1699	28.5	1699	28.5
BRNF15_59_92	92.3643	0.1053	1.7094	3.99	3.25815	0.2773	2.88496	0.71966		1577	40	1629	27	1713	32	1713	32
BRNF15_59_87	413.343	0.10711	1.49379	4.507	3.10628	0.3085	2.75527	0.84193		1734	42.5	1733	25	1752	27	1752	27
BRNF15_59_53	261.784	0.10957	1.50589	4.783	3.03157	0.3193	2.81867	0.72608		1786	43.5	1780.3	26	1790	27	1790	27
BRNF15_59_71	397.524	0.11019	1.49741	4.552	3.07557	0.3003	2.8305	0.81916		1692	42	1739	25.5	1801	27.5	1801	27.5
BRNF15_59_2	377.962	0.11138	1.48141	4.974	3.01568	0.3192	2.81955	0.57554		1785	43.5	1813.9	25.5	1822	26.5	1822	26.5
BRNF15_59_40	143.905	0.115	1.52174	5.413	3.04822	0.3482	2.72832	0.70233		1925	46.5	1885	26	1877	27.5	1877	27.5
BRNF15_59_14	113.797	0.1168	1.5411	5.637	3.01579	0.3497	2.71661	0.62344		1932	46.5	1920	26	1907	27	1907	27
BRNF15_59_80	267.057	0.117	1.53846	5.06	3.16206	0.3178	2.83197	0.80198		1778	44.5	1826	27	1908	28	1908	28
BRNF15_59_54	49.414	0.1175	1.65957	5.67	3.1746	0.3515	2.84495	0.41		1942	48	1924	25.5	1911	28.5	1911	28.5
BRNF15_59_94	90.7994	0.1195	1.58996	5.7	3.15789	0.3465	2.886	0.77047		1920	46	1930	28	1948	27.5	1948	27.5
BRNF15_59_11	216.877	0.1201	1.49875	5.328	3.003	0.3204	2.80899	0.72871		1791	43.5	1873	26.5	1960	27.5	1960	27.5
BRNF15_59_5	78.8073	0.1209	1.53019	5.888	3.05707	0.3523	2.83849	0.64818		1944	47	1961	27	1966	27.5	1966	27.5
BRNF15_59_47	223.171	0.1292	1.50929	6.67	3.07346	0.3752	2.79851	0.23758		2053	49	2067	26.5	2084	26.5	2084	26.5
BRNF15_59_33	271.65	0.148	3.71622	7.22	5.40166	0.3508	2.99316	0.86479		1936	50	2107	46	2250	60	2250	60
BRNF15_59_78	217.728	0.14853	1.48118	9.372	3.04097	0.465	2.7957	0.78574		2461	55	2374.5	28	2329	25	2329	25
BRNF15_59_62	84.4547	0.1638	1.49573	10.62	3.06026	0.4684	2.77541	0.7106		2479	60	2492	28.5	2497	25	2497	25
BRNF15_59_4	104.271	0.172	1.51163	10.6	3.06604	0.4439	2.81595	0.81371		2369	55	2486	28.5	2577	25.5	2577	25.5
BRNF15_59_88	251.068	0.1726	1.50637	9.75	3.17949	0.4153	2.88948	0.87203		2238	55	2408	29	2581	25	2581	25
BRNF15_59_16	91.6329	0.1742	1.49254	11.96	3.05184	0.4946	2.83057	0.70904		2588	60	2603	27.5	2598	24.5	2598	24.5
BRNF15_59_77	164.657	0.1843	1.49213	13.42	3.05514	0.534	2.80899	0.74884		2759	65	2710	28	2690	24.5	2690	24.5
BRNF15_59_32	303.118	0.1948	1.46304	12.98	3.04314	0.4852	2.78236	0.87659		2548	60	2677	28.5	2783.4	24.5	2783.4	24.5
BRNF15_59_18	72.6327	0.209	1.5311	16.08	3.10945	0.5509	2.81358	0.83147		2830	65	2879	30	2897	24.5	2897	24.5
BRNF15_59_69	37.9323	0.2579	1.55099	23.48	2.98126	0.6594	2.80558	0.6079		3261	70	3246	28.5	3233	24	3233	24
BRNF15-60_Type 2
					Isotopic Ratios							Apparent Ages
Analysis	U	207Pb*	±	207Pb*	±	206Pb*	±	error		206Pb*	±	207Pb*	±	206Pb*	±	Best	±
	(ppm)	206Pb*	(%)	235U	(%)	238U	(%)	corr.		238U	Ma	235U	Ma	207Pb*	Ma	Age†	Ma††
BRNF15_60_26	507.408	0.0472	2.22458	0.1159	3.45125	0.01766	2.80294	0.16088		112.8	3.15	111.2	3.65	68	42.5	112.8	3.15
BRNF15_60_11	864.108	0.0479	1.9833	0.1184	3.29392	0.01791	2.79174	0.09001		114.4	3.15	113.5	3.55	99	40	114.4	3.15
BRNF15_60_55	291.892	0.0511	2.15264	0.1803	3.32779	0.02481	2.82144	0.23549		158	4.4	167.8	5.5	222	43	158	4.4
BRNF15_60_24	978.925	0.0488	1.94672	0.1988	3.26962	0.02939	2.72201	0.27447		186.7	5	183.9	5.5	137	40	186.7	5
BRNF15_60_21	57.9701	0.0608	4.19408	0.251	4.78088	0.03114	3.05074	0.064623		197.6	6	229	9.5	540	85	197.6	6
BRNF15_60_5	867.34	0.0582	1.71821	0.2526	3.16706	0.03123	2.72174	0.35669		198.2	5.5	228.5	6.5	546	37.5	198.2	5.5
BRNF15_60_27	113.797	0.05	2.7	0.218	3.66972	0.03172	2.83733	0.18832		201.3	6	201.8	7	207	55	201.3	6
BRNF15_60_12	168.739	0.052	2.78846	0.23	3.91304	0.03194	2.81778	0.093641		203	5.5	208.9	7	249	55	203	5.5
BRNF15_60_66	61.0659	0.0529	3.59168	0.233	4.29185	0.03216	2.95398	0.094818		204.5	6	211	8.5	330	70	204.5	6
BRNF15_60_63	129.786	0.0545	2.75229	0.241	3.73444	0.03229	2.94209	-0.030479		204.8	6	217.5	7.5	333	55	204.8	6
BRNF15_60_30	489.888	0.0549	1.82149	0.3579	3.21319	0.04645	2.79871	0.47556		292.7	8	310.6	8.5	400	40.5	292.7	8
BRNF15_60_48	995.085	0.0651	1.92012	0.431	3.24826	0.04848	2.88779	0.33844		305.2	8.5	364.6	10	780	40	305.2	8.5
BRNF15_60_50	2395.01	0.05713	1.48783	0.3872	3.09917	0.04884	2.76413	0.80664		307.3	8.5	332.5	8.5	493	33	307.3	8.5
BRNF15_60_89	274.371	0.0539	1.76252	0.419	3.10263	0.05489	2.82383	0.27821		344.5	9.5	354.6	9.5	354	40	344.5	9.5
BRNF15_60_58	903.231	0.05734	1.65678	0.461	3.2538	0.05724	2.8826	0.6488		358.8	9.5	384.2	10.5	512	35.5	358.8	9.5
BRNF15_60_61	840.294	0.05368	1.58346	0.4299	3.02396	0.05738	2.78843	0.40692		359.6	9.5	363.2	9.5	350	36	359.6	9.5
BRNF15_60_6	810.867	0.0602	1.82724	0.483	3.20911	0.05806	2.75577	0.31865		363.8	10	399	10.5	594	40	363.8	10
BRNF15_60_45	382.895	0.0533	1.96998	0.429	3.2634	0.05817	2.83651	0.19025		364.5	10	361.8	10	341	43.5	364.5	10
BRNF15_60_87	593.139	0.05444	1.6532	0.453	3.09051	0.05834	2.82825	0.45794		365.5	10	379.6	9.5	387	36	365.5	10
BRNF15_60_82	380.173	0.0582	1.71821	0.491	3.15682	0.05887	2.80279	0.51057		368.7	10	405.5	10.5	531	38.5	368.7	10
BRNF15_60_90	248.006	0.0548	1.91606	0.455	3.2967	0.05901	2.79614	0.11099		369.6	10	379.3	10.5	364	39.5	369.6	10
BRNF15_60_22	205.991	0.0528	1.89394	0.433	3.23326	0.05928	2.7834	0.2945		371.2	10	364.2	10	300	40.5	371.2	10
BRNF15_60_46	369.117	0.0626	1.99681	0.509	3.43811	0.05934	2.78059	0.13777		371.6	10	414	11	656	41	371.6	10
BRNF15_60_39	276.412	0.062	1.93548	0.506	3.35968	0.06057	2.80667	-0.0039768		379	10.5	414.9	11	652	42	379	10.5
BRNF15_60_33	702.173	0.06708	1.5653	0.562	3.11388	0.06077	2.79743	0.59579		380.3	10.5	453.1	11.5	837	32.5	380.3	10.5
BRNF15_60_88	646.55	0.05546	1.62279	0.4768	3.04111	0.06098	2.7878	0.2046		381.5	10.5	395.3	10	419	35.5	381.5	10.5
BRNF15_60_20	1634.66	0.0573	1.7452	0.474	3.48101	0.0611	3.02782	0.73461		382.3	11	393	11	498	39.5	382.3	11
BRNF15_60_51	665.091	0.05544	1.62338	0.4827	3.10752	0.06171	2.75482	0.04747		386	10.5	399.4	10	417	36	386	10.5
BRNF15_60_42	405.008	0.057	1.75439	0.4857	3.19127	0.06259	2.79597	0.57361		391.3	10.5	402.4	10.5	493	37	391.3	10.5
BRNF15_60_84	687.204	0.05791	1.64048	0.5196	3.07929	0.06288	2.78308	0.60425		393.1	10.5	424.3	10.5	527	36.5	393.1	10.5
BRNF15_60_7	944.055	0.0585	1.7094	0.521	3.16699	0.0641	2.80811	0.4327		400.5	11	425.7	11	545	38.5	400.5	11
BRNF15_60_93	608.958	0.0605	1.73554	0.545	3.11927	0.06416	2.80549	0.42073		401.4	11	441.3	11	621	37.5	401.4	11
BRNF15_60_62	508.599	0.05512	1.72351	0.4918	3.15169	0.06454	2.78897	0.48806		403.1	11	405.8	10.5	413	38.5	403.1	11
BRNF15_60_59	470.497	0.05508	1.63399	0.5068	3.05841	0.06461	2.78595	0.49023		403.6	11	415.7	10.5	421	36.5	403.6	11
BRNF15_60_32	523.908	0.0547	1.64534	0.4913	3.1549	0.06524	2.75904	0.037851		407.4	11	405	10.5	385	37	407.4	11
BRNF15_60_92	177.925	0.0554	1.89531	0.504	3.27381	0.06541	2.82831	0.2919		408.4	11.5	414.4	11	418	42.5	408.4	11.5
BRNF15_60_41	295.804	0.0554	1.80505	0.482	3.21577	0.06538	2.82961	0.40293		408.6	11	398.9	10.5	417	39.5	408.6	11
BRNF15_60_47	893.025	0.05569	1.52631	0.506	3.06324	0.06589	2.80771	0.6561		411.3	11	415.3	10.5	444	34.5	411.3	11
BRNF15_60_8	298.525	0.0569	1.75747	0.525	3.2381	0.06615	2.79667	0.30232		412.9	11.5	429.5	11	491	39	412.9	11.5
BRNF15_60_64	760.347	0.05711	1.66346	0.5149	3.1074	0.06622	2.79372	0.38341		413.4	11	422.3	10.5	488	36.5	413.4	11
BRNF15_60_57	84.7098	0.0557	2.24417	0.518	3.37838	0.06626	2.86749	0.21975		413.5	11.5	424	12	407	48	413.5	11.5
BRNF15_60_35	317.747	0.05619	1.69069	0.512	3.125	0.06645	2.78405	0.48726		414.6	11.5	419.5	11	456	38.5	414.6	11.5
BRNF15_60_28	249.367	0.0599	1.83639	0.557	3.2316	0.0665	2.93233	0.43887		415.1	11.5	448.1	12	610	41	415.1	11.5
BRNF15_60_95	342.411	0.05574	1.61464	0.5182	3.08761	0.06656	2.77945	0.38412		415.7	11	422.4	10.5	423	36	415.7	11
BRNF15_60_65	155.812	0.0555	1.98198	0.498	3.21285	0.06684	2.84261	0.26144		417.5	11.5	410.6	11	420	43.5	417.5	11.5
BRNF15_60_4	237.97	0.0541	1.84843	0.525	3.2381	0.0694	2.8098	0.40686		432.5	12	427.3	11.5	372	40.5	432.5	12
BRNF15_60_80	857.304	0.0554	1.98556	0.545	3.30275	0.0713	2.87518	0.42954		443.9	12	441	12	422	45	443.9	12
BRNF15_60_40	207.862	0.0564	1.77305	0.545	3.21101	0.07207	2.84446	0.37741		448.5	12	441.4	11.5	457	39	448.5	12
BRNF15_60_18	137.611	0.0547	1.91956	0.55	3.27273	0.07221	2.83894	0.29442		449.4	12.5	443.3	12	387	42.5	449.4	12.5
BRNF15_60_70	131.487	0.0542	2.21402	0.531	3.57815	0.0729	2.88066	0.36853		453.8	12.5	433	12	368	50	453.8	12.5
BRNF15_60_85	152.41	0.0718	2.78552	0.777	3.9897	0.0758	2.83641	0.31209		471.5	13	565	13.5	848	38.5	471.5	13
BRNF15_60_16	769.702	0.05894	1.69664	0.621	3.1401	0.0765	2.81046	0.53053		474.9	13	490	12	562	35.5	474.9	13
BRNF15_60_78	279.474	0.0701	1.71184	0.817	3.18237	0.0831	2.82792	0.51317		514.5	14	606	14.5	925	35	514.5	14
BRNF15_60_52	308.051	0.05819	1.63258	0.696	3.08908	0.08534	2.81228	0.41944		527.8	14	536.1	13	527	36	527.8	14
BRNF15_60_23	532.923	0.07341	1.56654	0.947	3.1679	0.0925	2.86486	0.68925		570	15.5	677.1	15.5	1024	32	570	15.5
BRNF15_60_54	132.678	0.0593	1.85497	0.795	3.20755	0.0933	2.8403	0.22944		574.9	15.5	595	14.5	603	41.5	574.9	15.5
BRNF15_60_17	236.439	0.0619	2.01939	0.974	3.38809	0.1148	2.87456	0.33298		700	19	689	17	656	44	700	19
BRNF15_60_38	172.311	0.081	1.66667	1.545	3.13916	0.1412	2.83286	0.44895		851	22.5	950	19.5	1210	33.5	851	22.5
BRNF15_60_68	149.178	0.0732	1.70765	1.475	3.15254	0.1505	2.82392	0.42117		904	23.5	919	18.5	1014	33	904	23.5
BRNF15_60_9	334.587	0.0842	1.54394	1.797	3.06066	0.1529	2.845	0.74638		917	24	1043	20.5	1293	30.5	917	24
BRNF15_60_74	944.395	0.07103	1.47825	1.508	3.01724	0.157	2.7707	0.74355		940.6	24.5	932.8	18.5	956	30	940.6	24.5
BRNF15_60_56	28.0495	0.0733	2.6603	1.797	3.89538	0.1694	2.95159	0.32255		1008	28	1038	25	984	55	1008	28
BRNF15_60_53	52.6119	0.0777	1.86615	1.951	3.33162	0.1796	2.78396	0.4199		1064	28	1102	21.5	1149	37.5	1064	28
BRNF15_60_60	183.198	0.07504	1.59915	1.888	3.17797	0.1803	2.77316	0.49181		1068	27.5	1077.1	20	1069	32	1068	27.5
BRNF15_60_94	178.775	0.0799	1.56446	2.149	3.02466	0.1937	2.83944	0.43546		1142	30	1163	21	1189	31	1142	30
BRNF15_60_49	195.445	0.0825	1.57576	2.249	3.11249	0.1968	2.79472	0.50724		1158	29.5	1196.5	21	1253	31	1158	29.5
BRNF15_60_73	339.009	0.08562	1.51834	2.602	3.07456	0.225	2.88889	0.70384		1308	32.5	1300.5	22	1328	29	1328	29
BRNF15_60_36	568.134	0.08877	1.46446	2.9	3.10345	0.238	2.73109	0.75791		1376	34.5	1382.9	23	1402	28.5	1402	28.5
BRNF15_60_43	320.298	0.08923	1.51294	3.075	3.08943	0.2544	2.75157	-0.017358		1461	36.5	1424.8	23.5	1405	29	1405	29
BRNF15_60_10	279.304	0.0894	1.51007	2.943	3.0581	0.2365	2.74841	0.7094		1369	35	1391	23.5	1410	28.5	1410	28.5
BRNF15_60_83	369.287	0.09288	1.50732	3.21	2.9595	0.2424	2.88779	0.43795		1399	35	1458	22.5	1482	28.5	1482	28.5
BRNF15_60_29	113.967	0.09378	1.54617	3.326	3.15695	0.2528	2.76899	0.65059		1452	36.5	1485	24	1503	29	1503	29
BRNF15_60_31	458.419	0.09665	1.50026	2.149	3.02466	0.1618	2.78121	0.71034		966.8	25	1164.6	21.5	1558	28	1558	28
BRNF15_60_15	148.327	0.1066	1.54784	4.296	3.14246	0.2927	2.904	0.69659		1654	41.5	1690	26	1740	28.5	1740	28.5
BRNF15_60_67	142.374	0.1116	1.5233	5.086	3.04758	0.3356	2.83075	0.53771		1865	45	1833	25.5	1825	28.5	1825	28.5
BRNF15_60_37	201.228	0.1174	1.49063	5.453	3.11755	0.3393	2.79988	0.14885		1883	45.5	1891	26	1914	27	1914	27
BRNF15_60_71	129.616	0.1176	1.53061	5.624	3.02276	0.356	2.80899	0.63871		1962	47	1919	26	1919	27	1919	27
BRNF15_60_2	168.739	0.121	1.52893	5.603	3.12333	0.3329	2.85371	0.15585		1853	44.5	1914	26.5	1967	27	1967	27
BRNF15_60_34	103.761	0.1217	1.52013	6.079	3.04326	0.3666	2.72777	0.57567		2013	48	1990	27.5	1982	27	1982	27
BRNF15_60_75	390.72	0.1232	1.46104	5.558	3.05865	0.3284	2.74056	0.84854		1830	44.5	1912	26	2003	27	2003	27
BRNF15_60_25	160.744	0.1269	1.61545	5.62	3.20285	0.3154	2.85352	0.60905		1766	43.5	1916	27	2058	26	2058	26
BRNF15_60_13	245.624	0.158	1.48734	9.9	3.08081	0.4534	2.75695	0.83817		2411	55	2429	27	2435	25	2435	25
BRNF15_60_14	86.0706	0.1606	1.61893	10.55	3.22275	0.4751	2.84151	0.7341		2504	60	2487	30	2462	26.5	2462	26.5
BRNF15_60_72	64.9782	0.1611	1.52079	10.22	3.03327	0.4712	2.86503	0.72735		2487	60	2455	28.5	2467	26.5	2467	26.5
BRNF15_60_81	180.136	0.1626	1.50677	9.33	3.00107	0.4062	2.83112	0.79686		2197	50	2370	27.5	2483	25.5	2483	25.5
BRNF15_60_86	128.085	0.1746	1.48912	11.61	3.01464	0.4647	2.7975	0.7882		2459	55	2573	29	2600	24.5	2600	24.5
BRNF15_60_77	290.02	0.1817	1.541	11.28	3.10284	0.4522	2.9854	0.91796		2404	60	2545	29.5	2667	25	2667	25
BRNF15_60_79	89.6427	0.1929	1.50337	13.2	3.0303	0.4907	2.85307	0.84002		2575	60	2695	29.5	2765	24.5	2765	24.5
BRNF15_60_69	169.607	0.2058	1.50632	13.03	3.06984	0.4757	2.83792	0.71762		2507	60	2679	28.5	2870	24	2870	24
BRK14-8_Type 2
					Isotopic Ratios							Apparent Ages
Analysis	U	207Pb*	±	207Pb*	±	206Pb*	±	error		206Pb*	±	207Pb*	±	206Pb*	±	Best	±
	(ppm)	206Pb*	(%)	235U	(%)	238U	(%)	corr.		238U	Ma	235U	Ma	207Pb*	Ma	Age†	Ma††
BRK14_8_90	248.346	0.0527	2.56167	0.1215	3.41564	0.01681	2.2903	0.31151		107.5	2.45	116.6	3.7	300	50	107.5	2.45
BRK14_8_72	2975.05	0.0615	1.78862	0.285	3.50877	0.0333	2.7027	0.81801		211.3	5.5	254	8	666	35.5	211.3	5.5
BRK14_8_45	1741.82	0.05657	1.2374	0.3747	2.53536	0.04738	2.21612	0.80185		298.4	6.5	322.8	7	477	27	298.4	6.5
BRK14_8_107	1850.69	0.0615	1.38211	0.4387	2.62138	0.0529	2.26843	0.59845		332.3	7.5	370.3	8	651	30	332.3	7.5
BRK14_8_38	436.306	0.0547	1.55393	0.4155	2.64741	0.05398	2.13042	0.29091		338.9	7	353	8	402	34.5	338.9	7
BRK14_8_109	640.597	0.0547	1.37112	0.4087	2.56912	0.05439	2.20629	0.47063		341.4	7.5	347.5	7.5	397	31.5	341.4	7.5
BRK14_8_40	1158.38	0.05491	1.27481	0.4141	2.53562	0.05443	2.11281	0.4954		341.6	7	352.2	7.5	406	28	341.6	7
BRK14_8_84	145.776	0.0534	1.96629	0.407	2.9484	0.0562	2.31317	0.40261		352.5	8	347	9	327	42	352.5	8
BRK14_8_27	923.643	0.0576	1.38889	0.45	2.66667	0.0562	2.40214	0.68832		352.5	8.5	376.6	8.5	504	30.5	352.5	8.5
BRK14_8_53	260.763	0.0532	1.8797	0.426	2.8169	0.0567	2.29277	0.30198		355.6	8	359.3	8.5	341	41	355.6	8
BRK14_8_96	328.973	0.0561	1.60428	0.434	2.64977	0.0568	2.28873	0.3784		355.9	8	366.4	8	439	36.5	355.9	8
BRK14_8_43	196.806	0.0549	1.73042	0.429	2.7972	0.05725	2.18341	0.31221		358.8	8	363.8	8	392	38.5	358.8	8
BRK14_8_10	321.319	0.0545	1.74312	0.426	2.8169	0.05732	2.18074	0.30064		359.3	7.5	364.5	8.5	387	39.5	359.3	7.5
BRK14_8_76	235.248	0.0546	1.64835	0.435	2.75862	0.05736	2.17922	0.3647		359.5	7.5	366.4	8.5	378	37	359.5	7.5
BRK14_8_3	755.244	0.05432	1.28866	0.433	2.65589	0.05779	2.163	0.63371		362.1	7.5	365.5	8	378	30	362.1	7.5
BRK14_8_54	1284.25	0.05374	1.20953	0.4318	2.54748	0.05806	2.15295	0.68145		363.8	7.5	364.7	8	360	29	363.8	7.5
BRK14_8_65	183.708	0.0598	2.0903	0.494	2.93522	0.05897	2.20451	0.14913		369.3	8	407	10	577	44.5	369.3	8
BRK14_8_94	425.93	0.0548	1.45985	0.447	2.68456	0.05938	2.18929	0.48745		371.8	8	374.6	8.5	400	34	371.8	8
BRK14_8_34	711.358	0.05705	1.31464	0.479	2.6096	0.05948	2.18561	0.57559		372.4	8	397.2	8.5	496	28	372.4	8
BRK14_8_47	154.621	0.0572	2.01049	0.488	2.97131	0.0609	2.21675	0.35797		380.9	8.5	402	10	482	45.5	380.9	8.5
BRK14_8_61	726.327	0.0592	1.43581	0.507	2.5641	0.0613	2.20228	0.15637		383.4	8.5	415.9	9	561	29.5	383.4	8.5
BRK14_8_70	529.181	0.0557	1.3465	0.4754	2.52419	0.0619	2.26171	0.53849		387.8	8.5	394.4	8.5	443	30	387.8	8.5
BRK14_8_36	389.529	0.0554	1.7148	0.487	2.77207	0.06243	2.24251	0.42806		390.3	8.5	401.8	9.5	418	36.5	390.3	8.5
BRK14_8_80	1629.56	0.05663	1.23609	0.4906	2.44598	0.06249	2.16035	0.65987		390.7	8	405	8.5	474	26.5	390.7	8
BRK14_8_28	304.309	0.0559	1.69946	0.495	2.72727	0.06414	2.18273	0.24246		400.7	8.5	408.3	9	433	37	400.7	8.5
BRK14_8_115	319.788	0.0579	1.64076	0.519	2.6975	0.065	2.30769	0.18377		405.8	9	423.3	9.5	538	33	405.8	9
BRK14_8_62	438.858	0.0585	1.62393	0.534	2.71536	0.0651	2.22734	0.15055		406.6	8.5	431.7	9	525	35.5	406.6	8.5
BRK14_8_97	296.314	0.0555	1.71171	0.492	2.7439	0.0653	2.29709	0.40735		407.7	9	406.3	9.5	423	37	407.7	9
BRK14_8_37	1736.72	0.05663	1.1478	0.5261	2.47101	0.06581	2.20331	0.12264		410.8	8.5	428.8	9	478	24.5	410.8	8.5
BRK14_8_35	806.274	0.05562	1.25854	0.5176	2.51159	0.06621	2.19	0.46878		413.2	8.5	424.8	8.5	445	27.5	413.2	8.5
BRK14_8_30	345.133	0.0567	1.76367	0.531	2.91902	0.06703	2.16321	0.48505		418.2	9	431	10	474	38.5	418.2	9
BRK14_8_5	234.228	0.0547	1.73675	0.505	2.77228	0.0671	2.16095	0.11978		418.9	9	413.7	9.5	376	38	418.9	9
BRK14_8_108	273.861	0.0586	3.07167	0.543	3.59116	0.0672	2.23214	0.050437		419.1	9	437	10.5	493	39	419.1	9
BRK14_8_51	1314.87	0.05605	1.24888	0.5256	2.47336	0.06712	2.16031	0.41853		419.4	9	429.3	9	453	27.5	419.4	9
BRK14_8_23	317.066	0.054	1.75926	0.512	2.73438	0.0677	2.21566	0.3828		422	9	420.7	10	370	39.5	422	9
BRK14_8_81	704.214	0.05561	1.25877	0.516	2.61628	0.0678	2.21239	0.6244		423	9	422.1	9	435	29.5	423	9
BRK14_8_15	364.014	0.0565	1.41593	0.532	2.63158	0.0681	2.27606	0.43284		424.8	9	432.1	9	466	30.5	424.8	9
BRK14_8_57	393.781	0.0573	1.48342	0.548	2.55474	0.0693	2.23665	0.17046		432	9.5	444.6	9.5	489	33	432	9.5
BRK14_8_89	341.221	0.0575	1.3913	0.565	2.56637	0.0715	2.23776	0.52759		445.3	9.5	454.9	9.5	505	30	445.3	9.5
BRK14_8_105	366.906	0.0659	1.6692	0.651	2.84178	0.072	2.22222	0.39773		448.1	10	508	11	791	35.5	448.1	10
BRK14_8_22	63.4983	0.0563	2.75311	0.58	3.44828	0.0749	2.4032	0.30616		466	11	469	13	450	55	466	11
BRK14_8_1	269.268	0.0597	1.50754	0.617	2.75527	0.076	2.23684	0.5968		471.9	10.5	486	11	579	33	471.9	10.5
BRK14_8_59	1080.13	0.0596	1.42617	0.639	2.73865	0.0768	2.14844	0.35234		477	10	498.4	9.5	568	27	477	10
BRK14_8_39	248.516	0.0592	1.52027	0.705	2.69504	0.085	2.23529	0.56619		525.7	11.5	544	11	575	33	525.7	11.5
BRK14_8_25	69.741	0.0592	2.36486	0.716	3.21229	0.0868	2.36175	0.11042		537	12	544	13.5	518	50	537	12
BRK14_8_75	232.357	0.0572	1.57343	0.703	2.7027	0.0898	2.28285	0.37207		554.1	12	539	11.5	507	35.5	554.1	12
BRK14_8_82	408.58	0.0595	1.42857	0.737	2.7137	0.09	2.33333	-0.035812		555	12.5	560	11.5	576	32.5	555	12.5
BRK14_8_52	319.448	0.0684	2.77778	0.86	3.83721	0.0905	2.20994	0.51369		558.2	12	622	16.5	808	47.5	558.2	12
BRK14_8_12	160.574	0.0604	1.73841	0.8	2.8125	0.0967	2.27508	0.48357		595	13	595	12.5	602	36	595	13
BRK14_8_16	302.438	0.06	1.33333	0.82	2.62195	0.0971	2.21421	0.62888		597.1	12.5	606	12	600	28.5	597.1	12.5
BRK14_8_87	1479.87	0.07418	1.14586	1.376	2.72529	0.1337	2.35602	0.9339		808	18	877	16.5	1050	23	808	18
BRK14_8_73	715.441	0.07139	1.19064	1.462	2.49658	0.1494	2.20884	0.72939		897	18.5	915.9	14.5	964	24	897	18.5
BRK14_8_71	477.811	0.0711	1.1955	1.501	2.53165	0.1522	2.1682	0.6772		913	18.5	930	15.5	958	24.5	913	18.5
BRK14_8_74	225.212	0.0749	1.8024	1.691	2.95683	0.1675	2.53731	0.64058		998	23.5	1003	19	1068	36	998	23.5
BRK14_8_111	196.465	0.0746	1.34048	1.878	2.63578	0.1855	2.26415	0.63513		1096	23	1073	18	1052	27.5	1096	23
BRK14_8_56	71.9523	0.0774	1.80879	2.045	2.68949	0.1887	2.33174	-0.059903		1114	24	1125	19	1132	27	1114	24
BRK14_8_41	474.069	0.07896	1.20314	2.093	2.38892	0.192	2.21354	0.74563		1134	23	1146	17	1169	23	1134	23
BRK14_8_85	240.862	0.079	1.26582	2.203	2.4966	0.2017	2.18146	0.59892		1184	23.5	1183	17	1172	26	1184	23.5
BRK14_8_103	115.668	0.0839	1.31108	2.443	2.66066	0.2101	2.21323	0.60254		1229	24.5	1255	18	1296	27	1229	24.5
BRK14_8_114	351.937	0.0848	1.17925	2.574	2.52525	0.2204	2.17786	0.76453		1285	25	1291	18.5	1311	24	1311	24
BRK14_8_66	414.364	0.08572	1.16659	2.446	2.45298	0.2045	2.20049	0.80825		1199	24	1259	18.5	1330	23.5	1330	23.5
BRK14_8_21	484.445	0.0875	1.2	2.876	2.43394	0.235	2.12766	0.70084		1360	27	1376	20	1368	23	1368	23
BRK14_8_33	170.44	0.0876	1.25571	2.768	2.70954	0.2246	2.22618	0.75233		1308	28	1345	19.5	1378	24.5	1378	24.5
BRK14_8_63	539.217	0.0895	1.34078	2.636	2.84522	0.2108	2.60911	0.80156		1237	28.5	1311	21.5	1412	25.5	1412	25.5
BRK14_8_26	74.1636	0.0908	1.37665	3.294	2.58045	0.2563	2.14592	0.5655		1470	29.5	1478	20	1445	26.5	1445	26.5
BRK14_8_79	205.651	0.0911	1.26235	3.104	2.57732	0.2492	2.20706	0.74149		1433	29	1434	20	1451	23.5	1451	23.5
BRK14_8_86	417.936	0.09142	1.14855	3.218	2.48602	0.2559	2.14928	0.6897		1468	28.5	1461	19.5	1455	21.5	1455	21.5
BRK14_8_9	291.721	0.0916	1.20087	3.209	2.49299	0.2533	2.17134	0.79166		1455	29	1462	19	1456	23	1456	23
BRK14_8_99	161.765	0.0922	1.24729	3.048	2.62467	0.2408	2.07641	0.099853		1391	27	1417	19.5	1465	24	1465	24
BRK14_8_13	935.55	0.09279	1.13159	3.254	2.45851	0.2537	2.16791	0.85487		1461	28.5	1471	18.5	1483	21.5	1483	21.5
BRK14_8_17	578.85	0.09436	1.16575	2.836	2.46827	0.217	2.18894	0.78791		1265	25	1365	18.5	1514	22	1514	22
BRK14_8_48	324.891	0.0991	1.16044	4.006	2.62107	0.2898	2.24293	0.81209		1639	32.5	1634	20.5	1606	22	1606	22
BRK14_8_106	736.533	0.10012	1.09868	3.835	2.47718	0.2792	2.149	0.87394		1586	31	1601	20	1629	20	1629	20
BRK14_8_7	65.8967	0.1016	1.42717	3.764	2.65675	0.2696	2.22552	0.5908		1537	31.5	1585	21.5	1651	27	1651	27
BRK14_8_2	525.609	0.10378	1.10811	4.238	2.47758	0.2986	2.17683	0.83168		1683	33	1685	22	1694	20.5	1694	20.5
BRK14_8_67	802.872	0.10434	1.10217	4.214	2.49169	0.2932	2.21692	0.87299		1656	32.5	1678	20.5	1704	20.5	1704	20.5
BRK14_8_24	503.156	0.10543	1.09077	4.24	2.47642	0.2868	2.26639	0.85527		1625	31.5	1681	21	1720	20.5	1720	20.5
BRK14_8_101	353.638	0.1054	1.18596	3.522	2.69733	0.2433	2.26058	0.89349		1403	29	1534	21.5	1722	21	1722	21
BRK14_8_64	1990.17	0.1061	1.17813	3.211	2.64715	0.2174	2.29991	0.89464		1268	27.5	1465	23	1740	24	1740	24
BRK14_8_95	617.463	0.1066	1.50094	2.94	3.06122	0.2005	2.74314	0.71123		1177	28.5	1392	21.5	1745	25	1745	25
BRK14_8_102	132.338	0.1086	1.19705	4.487	2.56296	0.3	2.16667	0.70867		1690	32.5	1728	20.5	1771	22.5	1771	22.5
BRK14_8_32	184.048	0.1094	1.1883	4.736	2.53378	0.3071	2.11657	0.76517		1725	33	1771	21.5	1787	21.5	1787	21.5
BRK14_8_100	720.373	0.1097	1.13947	3.083	2.59488	0.2052	2.38791	0.90266		1202	26.5	1431	20.5	1794	21.5	1794	21.5
BRK14_8_55	97.2972	0.1113	1.30279	4.842	2.58158	0.3139	2.23001	0.25682		1758	35.5	1791	21	1820	25	1820	25
BRK14_8_8	223.341	0.1124	1.20107	3.968	2.52016	0.2568	2.14174	0.68801		1473	28.5	1630	20	1835	22	1835	22
BRK14_8_113	58.3443	0.1132	1.36926	5.21	2.68714	0.3346	2.24148	0.65441		1863	37.5	1850	22.5	1842	25	1842	25
BRK14_8_18	490.909	0.1147	1.17698	4.836	2.48139	0.301	2.15947	0.79249		1695	33	1789	21	1875	21.5	1875	21.5
BRK14_8_60	38.8338	0.1153	1.60451	4.85	2.68041	0.3039	2.30339	0.53062		1709	34.5	1792	23	1877	28.5	1877	28.5
BRK14_8_11	134.889	0.1148	1.21951	5.281	2.55633	0.3317	2.26108	0.30528		1845	35.5	1863	21.5	1878	23.5	1878	23.5
BRK14_8_4	211.434	0.1156	1.21107	5.339	2.52856	0.3353	2.2368	0.77504		1866	36.5	1877	22.5	1887	22	1887	22
BRK14_8_83	89.8128	0.1174	1.27768	5.443	2.57211	0.3393	2.21043	0.68829		1882	36	1891	22.5	1917	22.5	1917	22.5
BRK14_8_50	319.788	0.1182	1.14213	5.406	2.49723	0.3288	2.12895	0.72512		1832	35	1887	22.5	1927	20.5	1927	20.5
BRK14_8_49	270.119	0.1183	1.14117	5.403	2.49861	0.3278	2.13545	0.71635		1827	34	1885	21.5	1929	20.5	1929	20.5
BRK14_8_58	80.7975	0.1199	1.37615	5.57	2.60323	0.3361	2.23148	0.32249		1866	37	1909	22	1945	25	1945	25
BRK14_8_20	305.159	0.1259	1.15171	5.911	2.45305	0.3358	2.23347	0.77533		1865	35.5	1961	21.5	2043	20	2043	20
BRK14_8_44	104.441	0.1449	1.24224	8.6	2.5	0.4206	2.25868	0.71182		2261	42	2297	23.5	2287	22	2287	22
BRK14_8_68	63.4473	0.1475	1.25424	8.6	2.55814	0.4244	2.23845	0.7092		2278	43.5	2295	23	2320	21.5	2320	21.5
BRK14_8_31	186.43	0.1484	1.11186	8.85	2.48588	0.4268	2.22587	0.80235		2293	43	2322	23	2327	19	2327	19
BRK14_8_104	160.574	0.1503	1.16434	9.01	2.49723	0.4348	2.18491	0.79311		2329	43.5	2342	22	2349	19.5	2349	19.5
BRK14_8_88	270.459	0.1526	1.11402	8.75	2.51429	0.4163	2.28201	0.85318		2245	42.5	2310	23	2376	19	2376	19
BRK14_8_6	13.8972	0.1628	1.68919	9.67	2.89555	0.436	2.52294	0.62272		2333	49.5	2396	26	2491	28.5	2491	28.5
BRK14_8_93	271.65	0.1722	1.16144	8.85	2.65537	0.3725	2.28188	0.89439		2039	40.5	2319	24	2576	19	2576	19
BRK14_8_42	177.244	0.1754	1.14025	11.9	2.52101	0.485	2.16495	0.83158		2547	46.5	2595	24	2609	18.5	2609	18.5
BRK14_8_112	80.1001	0.1841	1.16784	12.89	2.52133	0.5106	2.25225	0.73822		2660	48.5	2672	24	2692	19.5	2692	19.5
BRK14_8_77	119.41	0.1862	1.31579	11.8	2.75424	0.463	2.37581	0.79407		2454	49.5	2586	24.5	2708	21	2708	21
BRK14_8_19	103.421	0.2207	1.13276	17.97	2.50417	0.5876	2.21239	0.819		2981	50	2989	24	2984	18.5	2984	18.5
BRJR13-K1c_Type 3
					Isotopic Ratios							Apparent Ages
Analysis	U	207Pb*	±	207Pb*	±	206Pb*	±	error		206Pb*	±	207Pb*	±	206Pb*	±	Best	±
	(ppm)	206Pb*	(%)	235U	(%)	238U	(%)	corr.		238U	Ma	235U	Ma	207Pb*	Ma	Age†	Ma††
BRJR13-K1c_23	546.021	0.0568	1.67254	0.4277	3.62404	0.05498	3.4558	0.50037		345	11.5	361	11	470	22.5	345	11.5
BRJR13-K1c_20	321.489	0.05565	1.61725	0.4215	3.55872	0.05565	3.4142	0.41486		349.1	11.5	358.1	10.5	428	21	349.1	11.5
BRJR13-K1c_27	438.858	0.0581	1.54905	0.4519	3.54061	0.05799	3.44887	0.36439		363.3	12	378.5	11	528	21	363.3	12
BRJR13-K1c_8	151.389	0.0672	1.93452	0.532	3.57143	0.05855	3.50128	0.04854		366.7	12.5	433.3	12.5	871	29	366.7	12.5
BRJR13-K1c_37	180.306	0.055	1.72727	0.432	3.58796	0.05873	3.40541	0.31439		368.1	12.5	364.5	11	422	22.5	368.1	12.5
BRJR13-K1c_41	182.007	0.0542	1.75277	0.4249	3.53024	0.05897	3.39156	0.22351		369.3	12.5	358.7	10.5	386	21.5	369.3	12.5
BRJR13-K1c_50	569.835	0.06238	1.52292	0.5087	3.44014	0.05969	3.43441	0.31192		373.9	12.5	417.2	12	692	22	373.9	12.5
BRJR13-K1c_7	133.528	0.0565	1.85841	0.458	3.60262	0.06057	3.46706	0.20789		379	12.5	381.6	11.5	468	25	379	12.5
BRJR13-K1c_39	200.718	0.0548	1.73358	0.4509	3.54846	0.06072	3.4585	0.22309		380	12.5	377	11	437	19	380	12.5
BRJR13-K1c_30	486.486	0.05575	1.52466	0.4574	3.49803	0.06085	3.45111	0.29582		380.8	12.5	381.6	11	441	20	380.8	12.5
BRJR13-K1c_21	113.967	0.0551	1.90563	0.466	3.64807	0.06143	3.41853	0.11145		384.2	13	386.7	11.5	439	22	384.2	13
BRJR13-K1c_11	312.984	0.05698	1.66725	0.4808	3.53577	0.06162	3.40798	0.24302		385.4	13	399.6	12	502	23	385.4	13
BRJR13-K1c_29	260.253	0.05584	1.61175	0.4947	3.5375	0.06574	3.42257	0.32325		410.4	13.5	407.7	12	452	21.5	410.4	13.5
BRJR13-K1c_4	216.027	0.0592	1.77365	0.529	3.59168	0.06584	3.41738	0.18873		411	13.5	430.7	12.5	581	24	411	13.5
BRJR13-K1c_2	278.964	0.05622	1.60085	0.5119	3.51631	0.06713	3.42619	0.29191		419.1	14	419.8	12	469	25	419.1	14
BRJR13-K1c_79	804.573	0.05804	1.46451	0.542	3.50554	0.06794	3.38534	0.44579		423.7	14	439.6	12.5	544	18	423.7	14
BRJR13-K1c_58	55.1124	0.0557	2.60323	0.526	3.9924	0.0683	3.51391	0.16185		425.8	14.5	427	13.5	537	26	425.8	14.5
BRJR13-K1c_69	360.612	0.0675	1.77778	0.635	3.54331	0.06856	3.42765	0.30259		427.4	14.5	498.5	14	857	21	427.4	14.5
BRJR13-K1c_38	192.213	0.05583	1.61204	0.5195	3.46487	0.06877	3.41719	0.37612		428.7	14	424.4	12.5	448	20	428.7	14
BRJR13-K1c_40	120.771	0.058	1.81034	0.547	3.65631	0.07025	3.41637	0.21155		437.6	14.5	442.3	13	530	25	437.6	14.5
BRJR13-K1c_59	127.575	0.0582	1.89003	0.551	3.62976	0.07035	3.41151	0.14272		438.2	14.5	447	13	536	24.5	438.2	14.5
BRJR13-K1c_1	309.582	0.05696	1.66784	0.545	3.57798	0.07062	3.46927	0.38912		439.8	14.5	440.7	12.5	474	21	439.8	14.5
BRJR13-K1c_28	261.954	0.05755	1.56386	0.5502	3.54417	0.07099	3.45119	0.40633		442	14.5	444.8	13	514	18	442	14.5
BRJR13-K1c_34	255.15	0.05626	1.59972	0.5392	3.52374	0.07102	3.44973	0.35609		442.6	14.5	437	12.5	470	22	442.6	14.5
BRJR13-K1c_53	136.93	0.057	1.66667	0.558	3.58423	0.07122	3.44004	0.26746		443.7	15	449.7	13	517	23	443.7	15
BRJR13-K1c_89	367.416	0.0559	1.61002	0.5603	3.48028	0.07197	3.4042	0.32556		447.9	15	451.3	12.5	447	20	447.9	15
BRJR13-K1c_44	108.184	0.0569	1.84534	0.563	3.64121	0.07319	3.41577	0.30589		455.2	15	453.2	13.5	511	21	455.2	15
BRJR13-K1c_60	137.271	0.0571	1.75131	0.571	3.59019	0.07379	3.45575	0.30429		459.3	15	459.1	13.5	510	22.5	459.3	15
BRJR13-K1c_68	379.323	0.05734	1.56958	0.5767	3.46801	0.07386	3.38478	0.30102		459.3	15	462.9	13	507	20	459.3	15
BRJR13-K1c_71	183.708	0.0605	1.73554	0.624	3.60577	0.07565	3.43688	0.29074		470	15.5	492.4	14	632	24	470	15.5
BRJR13-K1c_43	202.419	0.0579	1.72712	0.589	3.56537	0.0757	3.43461	0.23822		470.3	15.5	468.1	12.5	513	22	470.3	15.5
BRJR13-K1c_76	261.954	0.0595	1.76471	0.62	3.62903	0.07669	3.45547	0.35261		476.2	16	489.7	14.5	594	25	476.2	16
BRJR13-K1c_62	379.323	0.05682	1.58395	0.6029	3.48316	0.07751	3.41891	0.41777		481.2	16	479.1	13.5	489	24	481.2	16
BRJR13-K1c_67	182.007	0.0581	1.72117	0.634	3.5489	0.07907	3.4147	0.3477		490.5	16	499.6	14	560	20.5	490.5	16
BRJR13-K1c_85	244.944	0.05634	1.59744	0.627	3.58852	0.08032	3.4238	0.47932		497.9	16.5	493.4	14	481	20.5	497.9	16.5
BRJR13-K1c_66	176.904	0.0594	1.85185	0.666	3.6036	0.08157	3.43263	0.27372		505.4	16.5	521	15	601	28	505.4	16.5
BRJR13-K1c_78	477.981	0.0568	1.49648	0.6541	3.51628	0.08368	3.40583	0.5426		518	17	510.7	14	489	19.5	518	17
BRJR13-K1c_24	60.2154	0.0704	2.2017	0.827	3.74849	0.0853	3.45838	-0.058481		527.8	17.5	611	17	939	36	527.8	17.5
BRJR13-K1c_70	127.575	0.0586	1.87713	0.7	3.64286	0.0868	3.45622	0.33226		536.2	17.5	539	15	577	23.5	536.2	17.5
BRJR13-K1c_80	153.94	0.057	1.75439	0.678	3.61357	0.08687	3.45344	0.28649		536.9	17.5	526.6	14.5	486	22	536.9	17.5
BRJR13-K1c_46	187.11	0.06134	1.63026	0.751	3.52863	0.09131	3.44979	0.42699		563.1	18.5	567.8	15.5	640	19.5	563.1	18.5
BRJR13-K1c_45	123.833	0.0613	1.71289	0.778	3.59897	0.09382	3.46408	0.25388		577.9	19	583.7	16	649	21	577.9	19
BRJR13-K1c_54	102.23	0.0686	2.76968	0.889	4.38695	0.0947	3.43189	0.43338		583.2	19.5	620	15.5	780	34.5	583.2	19.5
BRJR13-K1c_73	728.028	0.06492	1.46334	1.16	3.44828	0.131	3.39695	0.65637		793.4	25.5	782.9	19	769.7	17.5	793.4	25.5
BRJR13-K1c_26	145.946	0.0723	1.72891	1.578	3.48542	0.1607	3.42253	0.2305		960.5	30.5	963	21	985	21.5	985	21.5
BRJR13-K1c_5	48.1383	0.0728	1.8544	1.566	3.51213	0.1588	3.46348	0.25864		950	30.5	955	22.5	1021	21.5	1021	21.5
BRJR13-K1c_51	214.326	0.07422	1.54945	1.637	3.3598	0.1615	3.40557	0.46317		965	30.5	984.1	21.5	1050	21.5	1050	21.5
BRJR13-K1c_49	69.4008	0.0751	1.66445	1.861	3.49275	0.1845	3.52304	0.34194		1092	34.5	1069	23.5	1073	20.5	1073	20.5
BRJR13-K1c_19	61.9164	0.0762	1.64042	1.588	3.46348	0.1535	3.58306	0.37888		920.1	29.5	965	22	1093	19.5	1093	19.5
BRJR13-K1c_65	77.2254	0.0761	1.64258	1.859	3.4965	0.1789	3.35383	0.33496		1061	33.5	1067	23.5	1095	22.5	1095	22.5
BRJR13-K1c_18	143.564	0.0766	1.56658	1.404	3.49003	0.1324	3.43656	0.37029		801.5	26	889.5	21	1117	17.5	1117	17.5
BRJR13-K1c_13	109.374	0.07901	1.5188	2.185	3.43249	0.2018	3.46878	0.45071		1184.6	37	1177.9	24.5	1167	18	1167	18
BRJR13-K1c_14	176.904	0.08071	1.4868	2.237	3.57622	0.2016	3.47222	0.51659		1183.7	37	1192.2	24.5	1209	19.5	1209	19.5
BRJR13-K1c_63	471.177	0.08145	1.41191	2.369	3.37695	0.2112	3.31439	0.68227		1234.7	38	1232.5	24.5	1233	21	1233	21
BRJR13-K1c_64	265.356	0.08572	1.45824	2.643	3.40522	0.2268	3.52734	0.47543		1317.2	41	1311.1	25.5	1332	19	1332	19
BRJR13-K1c_77	160.744	0.0871	1.54994	3.078	3.57375	0.2591	3.47356	0.51122		1487	44.5	1429	25.5	1357	19	1357	19
BRJR13-K1c_48	193.914	0.09309	1.45021	3.345	3.43797	0.2657	3.38728	0.45497		1518.3	46	1490.9	26.5	1491	16.5	1491	16.5
BRJR13-K1c_47	132.848	0.09454	1.48085	3.254	3.53411	0.2527	3.36367	0.50131		1452	44.5	1467.9	27	1519	17	1519	17
BRJR13-K1c_74	100.359	0.0953	1.52151	3.95	3.5443	0.3021	3.47567	0.64318		1701	50	1625	28	1539	15.5	1539	15.5
BRJR13-K1c_25	156.662	0.09572	1.4626	3.333	3.45035	0.2568	3.50467	0.52757		1472.9	45	1489.3	27.5	1540.6	16.5	1540.6	16.5
BRJR13-K1c_3	37.9323	0.0952	1.57563	3.732	3.48339	0.287	3.48432	0.6146		1625	50	1579	28	1545	16	1545	16
BRJR13-K1c_55	124.343	0.0965	1.50259	3.814	3.53959	0.2899	3.44947	0.53767		1641	49	1596.3	28.5	1554	16.5	1554	16.5
BRJR13-K1c_31	43.2054	0.0963	1.60955	3.507	3.5643	0.2716	3.49779	0.34129		1548	47	1530	27.5	1555	18	1555	18
BRJR13-K1c_15	200.718	0.0966	1.50104	2.999	3.50117	0.2261	3.31712	0.37791		1314	40.5	1406.6	26.5	1556	23.5	1556	23.5
BRJR13-K1c_75	278.964	0.0968	1.49793	3.766	3.45194	0.2844	3.51617	0.67217		1613	49	1585	28.5	1568.7	14	1568.7	14
BRJR13-K1c_61	350.406	0.09995	1.45073	3.526	3.40329	0.2577	3.49243	0.85306		1477	45.5	1531.6	27	1625.1	17.5	1625.1	17.5
BRJR13-K1c_10	84.7098	0.10287	1.45815	4.258	3.52278	0.3019	3.47797	0.5441		1701	50	1685.5	29	1677	17.5	1677	17.5
BRJR13-K1c_9	121.451	0.10807	1.43426	4.639	3.44902	0.315	3.49206	0.53626		1764	55	1755.5	29	1764.9	16	1764.9	16
BRJR13-K1c_6	341.901	0.10854	1.42804	4.429	3.49966	0.2995	3.3389	0.68571		1688.4	50	1717.6	28.5	1776.2	16.5	1776.2	16.5
BRJR13-K1c_57	167.889	0.1103	1.58658	4.398	3.52433	0.2865	3.4904	0.69978		1623	50	1710	29.5	1815	17	1815	17
BRJR13-K1c_86	226.233	0.11728	1.44952	5.158	3.48972	0.3161	3.47991	0.70752		1770	55	1846.4	29	1915.7	16	1915.7	16
BRJR13-K1c_82	109.544	0.1296	1.50463	6.258	3.5155	0.3492	3.43643	0.57395		1931	55	2013	31	2095	15.5	2095	15.5
BRJR13-K1c_83	122.132	0.1305	1.45594	7.452	3.489	0.4086	3.42633	0.71718		2208	65	2168	31	2108.8	15.5	2108.8	15.5
BRJR13-K1c_35	62.4267	0.1769	1.46976	12.27	3.46373	0.5177	3.47692	0.60297		2690	75	2626	33	2620.8	15	2620.8	15
BRJR13-K1c_33	37.422	0.1785	1.48459	11.72	3.45563	0.4878	3.48503	0.63908		2559	75	2585	31.5	2645.7	13.5	2645.7	13.5
BRJR13-K1c_56	30.4479	0.1795	1.50418	13.69	3.46969	0.5586	3.40136	0.64936		2860	80	2725	32.5	2647	13.5	2647	13.5
BRJR13-K1c_16	24.1542	0.1869	1.49813	13.6	3.49265	0.5282	3.4078	0.64679		2735	80	2719	33.5	2719.8	13.5	2719.8	13.5
BRJR13-K1c_36	133.528	0.2117	1.44072	16.34	3.36597	0.5754	3.38895	0.82567		2928	80	2896	33.5	2925.8	16	2925.8	16
BRJR13-K2_Type 3
					Isotopic Ratios							Apparent Ages
Analysis	U	207Pb*	±	207Pb*	±	206Pb*	±	error		206Pb*	±	207Pb*	±	206Pb*	±	Best	±
	(ppm)	206Pb*	(%)	235U	(%)	238U	(%)	corr.		238U	Ma	235U	Ma	207Pb*	Ma	Age†	Ma††
BRJR13_K2_63	402.627	0.0596	1.84564	0.464	2.90948	0.05663	2.20731	-0.090675		355.1	7.5	386	9	545	32	355.1	7.5
BRJR13_K2_69	1835.38	0.0607	1.56507	0.476	2.62605	0.05763	2.16901	0.37348		361.2	7.5	395.6	8.5	624	33.5	361.2	7.5
BRJR13_K2_83	393.441	0.0576	1.47569	0.464	2.69397	0.05895	2.20526	0.4215		369.2	8	386.9	8.5	513	33	369.2	8
BRJR13_K2_6	867.51	0.0608	1.48026	0.505	2.67327	0.05971	2.17719	0.60827		374.4	8	414.4	9	632	31.5	374.4	8
BRJR13_K2_21	200.548	0.0557	1.6158	0.456	2.74123	0.05984	2.17246	0.31314		374.6	8	381.7	9	427	35.5	374.6	8
BRJR13_K2_11	714.42	0.05468	1.28018	0.4592	2.50436	0.06008	2.16378	0.54765		376.1	8	384.6	8	409	29.5	376.1	8
BRJR13_K2_82	240.351	0.0556	1.70863	0.454	2.86344	0.0607	2.22405	0.31551		379.6	8.5	379	9	430	39.5	379.6	8.5
BRJR13_K2_84	816.48	0.054	1.57407	0.465	2.68817	0.06242	2.16277	0.51671		390.3	8	387	8.5	366	35	390.3	8
BRJR13_K2_13	530.542	0.05448	1.37665	0.476	2.62605	0.06289	2.22611	0.53747		393.8	8.5	395.1	8.5	403	30.5	393.8	8.5
BRJR13_K2_1	393.271	0.0531	1.50659	0.472	2.64831	0.06336	2.13068	0.3929		396	8.5	393.1	8.5	332	33	396	8.5
BRJR13_K2_74	340.37	0.0598	1.75585	0.519	2.79383	0.0637	2.2763	0.43357		398	8.5	423	9.5	579	38.5	398	8.5
BRJR13_K2_80	241.542	0.0548	1.91606	0.495	2.92929	0.0647	2.24111	0.39262		403.8	8.5	408	9.5	385	40	403.8	8.5
BRJR13_K2_23	1236.63	0.05477	1.18678	0.4932	2.53447	0.0654	2.14067	0.17377		408.3	8.5	406.8	8.5	395	28	408.3	8.5
BRJR13_K2_32	240.691	0.0564	1.59574	0.517	2.70793	0.06695	2.1658	0.35673		417.7	9	423.1	9	443	36	417.7	9
BRJR13_K2_5	632.772	0.05675	1.23348	0.5413	2.494	0.06809	2.12953	0.59261		424.6	9	439.5	9	481	28	424.6	9
BRJR13_K2_14	86.9211	0.0566	2.56184	0.531	3.38983	0.0683	2.2694	-0.027626		426	9.5	429	12	434	50	426	9.5
BRJR13_K2_19	1575.13	0.05705	1.31464	0.534	2.71536	0.0688	2.5436	0.81011		429	10.5	434.1	9.5	491	28.5	429	10.5
BRJR13_K2_10	588.206	0.0558	1.43369	0.54	2.68519	0.0694	2.16138	#N/A		432.5	9	438	9.5	441	33.5	432.5	9
BRJR13_K2_48	723.605	0.05712	1.31303	0.551	2.54083	0.07072	2.12104	0.4159		440.5	9	446.1	9	488	29	440.5	9
BRJR13_K2_61	828.387	0.05585	1.25336	0.5412	2.49446	0.07076	2.1905	0.4711		440.7	9	438.7	9	444	26	440.7	9
BRJR13_K2_85	345.303	0.0575	1.56522	0.557	2.693	0.071	2.1831	0.40846		442.1	9.5	448.5	10	489	35	442.1	9.5
BRJR13_K2_53	143.905	0.0559	2.41503	0.547	3.10786	0.0718	2.22841	0.083333		446.7	9.5	442	11	416	50	446.7	9.5
BRJR13_K2_60	976.374	0.05656	1.23762	0.556	2.51799	0.07202	2.15218	0.6305		448.3	9.5	448.4	9.5	468	28	448.3	9.5
BRJR13_K2_22	318.087	0.0563	1.50977	0.553	2.62206	0.0723	2.213	0.31894		449.7	9.5	448.8	9.5	452	33.5	449.7	9.5
BRJR13_K2_59	58.3273	0.0556	3.68705	0.559	4.20394	0.0734	2.31608	0.24054		456.6	10.5	450	16	400	75	456.6	10.5
BRJR13_K2_33	146.626	0.054	1.66667	0.554	2.79783	0.074	2.22973	0.41461		460.3	10	446	10	356	38	460.3	10
BRJR13_K2_81	191.873	0.0575	1.91304	0.592	2.78716	0.0758	2.24274	0.022815		470.8	10	472	10.5	507	42	470.8	10
BRJR13_K2_44	1291.06	0.05628	1.24378	0.5859	2.47483	0.0763	2.16252	0.59467		474	10	469.5	9.5	458	27	474	10
BRJR13_K2_39	288.32	0.0548	1.64234	0.581	2.66781	0.0771	2.20493	0.13051		478.6	10	464.5	10	387	35	478.6	10
BRJR13_K2_76	611.339	0.0568	1.58451	0.601	2.74542	0.0774	2.19638	0.43772		480.4	10	477	10.5	473	35.5	480.4	10
BRJR13_K2_8	506.898	0.0707	1.55587	0.774	2.77778	0.07855	2.16423	0.53222		488	10.5	581	12	929	31.5	488	10.5
BRJR13_K2_55	467.775	0.0569	1.3181	0.617	2.67423	0.0787	2.1601	0.65202		488.4	10.5	488.6	10.5	488	30	488.4	10.5
BRJR13_K2_27	309.582	0.0609	1.72414	0.675	2.81481	0.0811	2.21948	0.32965		502.9	10.5	523	11.5	628	37	502.9	10.5
BRJR13_K2_89	225.723	0.0595	1.51261	0.695	2.73381	0.086	2.26744	0.50488		531.6	11.5	536	11	590	32.5	531.6	11.5
BRJR13_K2_28	675.297	0.06164	1.21674	0.766	2.61097	0.0913	2.19058	0.64078		563.4	12	577	11.5	657	27	563.4	12
BRJR13_K2_29	755.244	0.06127	1.22409	0.799	2.81602	0.0958	2.40084	0.90948		589	13.5	594	12.5	649	26.5	589	13.5
BRJR13_K2_67	585.144	0.06182	1.29408	0.813	2.58303	0.0963	2.23261	0.33777		592.4	12.5	604.2	11.5	659	27.5	592.4	12.5
BRJR13_K2_58	661.689	0.0622	1.60772	0.823	2.7339	0.0969	2.27038	0.60085		596	13	609	12.5	677	34.5	596	13
BRJR13_K2_12	636.174	0.06022	1.24543	0.886	2.5395	0.107	2.14953	0.64414		655	13.5	645.1	12	608	26	655	13.5
BRJR13_K2_52	865.809	0.06451	1.24012	0.955	2.51309	0.1077	2.18199	0.67437		659	13.5	680.2	12.5	757	25.5	659	13.5
BRJR13_K2_4	389.529	0.0618	1.3754	0.936	2.5641	0.1082	2.21811	0.55567		662.4	14	671.7	12.5	675	27.5	662.4	14
BRJR13_K2_50	199.527	0.062	1.53226	0.917	2.72628	0.1088	2.20588	0.29918		666	14	659	13	655	32	666	14
BRJR13_K2_7	189.661	0.0631	1.58479	1.001	2.6973	0.1137	2.19877	0.23663		694.2	14.5	702	13.5	708	32.5	694.2	14.5
BRJR13_K2_18	124.513	0.0814	1.7199	1.361	2.90228	0.1213	2.30833	0.58246		738	16	872	17	1231	33	738	16
BRJR13_K2_71	171.971	0.0786	1.52672	1.335	2.69663	0.1249	2.20176	0.44475		759	16	862	15	1168	28	759	16
BRJR13_K2_73	311.283	0.0762	1.77165	1.383	3.18149	0.1325	2.45283	0.49236		802	18.5	878	18	1088	33.5	802	18.5
BRJR13_K2_90	269.268	0.0723	1.52144	1.307	2.79265	0.1332	2.28979	0.64299		805	17.5	845	16	990	29	805	17.5
BRJR13_K2_93	332.716	0.07173	1.25471	1.373	2.54916	0.1413	2.26469	0.83244		851	18	880	16	978	25.5	851	18
BRJR13_K2_35	551.124	0.0715	1.32867	1.422	2.56681	0.1443	2.18295	0.16571		868	18	897	15.5	974	22.5	868	18
BRJR13_K2_26	477.641	0.07145	1.18964	1.423	2.49473	0.1456	2.16346	0.66586		876	17.5	897.7	15	966	24	876	17.5
BRJR13_K2_36	588.546	0.07048	1.13507	1.447	2.52246	0.1481	2.1607	0.79122		890	18	908	15.5	945	25	890	18
BRJR13_K2_64	489.888	0.07119	1.12375	1.502	2.46338	0.1542	2.1725	0.63054		924	18.5	931.1	15	964	24	924	18.5
BRJR13_K2_47	428.312	0.07234	1.24412	1.523	2.52791	0.1543	2.1711	0.69249		925	18.5	938	15.5	1002	23.5	925	18.5
BRJR13_K2_62	542.619	0.07288	1.1663	1.551	2.54674	0.1559	2.21296	0.80744		934	19	951	16	1010	23	934	19
BRJR13_K2_57	743.337	0.07152	1.11857	1.585	2.49211	0.1614	2.16853	0.81115		964	19.5	963.2	15.5	974	23	964	19.5
BRJR13_K2_88	283.557	0.0734	1.22616	1.696	2.53538	0.1688	2.19194	0.68425		1007	20	1005	16.5	1024	25.5	1007	20
BRJR13_K2_77	314.685	0.0802	1.30923	1.973	2.78763	0.1801	2.24875	0.3009		1069	22.5	1101	19	1193	26.5	1069	22.5
BRJR13_K2_79	39.14	0.0749	2.20294	1.858	2.96017	0.1814	2.28776	0.24567		1074	22.5	1062	19.5	1067	44.5	1074	22.5
BRJR13_K2_25	278.964	0.0769	1.49545	1.962	2.54842	0.1881	2.33918	0.58946		1111	24	1101	18	1117	30	1111	24
BRJR13_K2_56	40.5688	0.0831	1.68472	2.592	2.70062	0.2289	2.4028	0.30316		1327	28.5	1298	20.5	1252	35	1252	35
BRJR13_K2_45	306.86	0.08241	1.21344	2.198	2.50227	0.1933	2.19865	0.69816		1139	23	1180	18	1258	23	1258	23
BRJR13_K2_20	224.702	0.0857	1.28355	2.673	2.61878	0.2294	2.1796	0.72386		1330	26.5	1320	19	1328	25	1328	25
BRJR13_K2_17	600.453	0.0855	1.11111	2.565	2.53411	0.2211	2.14835	0.85443		1287	25	1290	19	1329	21.5	1329	21.5
BRJR13_K2_16	1536	0.08674	1.09523	2.801	2.49911	0.2321	2.15424	0.82827		1345	26.5	1355	18.5	1353	21.5	1353	21.5
BRJR13_K2_24	138.631	0.0872	1.26147	2.808	2.49288	0.2351	2.12675	0.64651		1363	26.5	1355	19.5	1364	25	1364	25
BRJR13_K2_91	496.012	0.08691	1.15062	2.134	2.57732	0.1801	2.33204	0.93027		1067	23	1156	18.5	1364	22.5	1364	22.5
BRJR13_K2_42	190.682	0.088	1.30682	2.839	2.64178	0.2371	2.3197	0.53435		1371	27.5	1363	19.5	1378	24.5	1378	24.5
BRJR13_K2_66	402.797	0.0906	1.21413	2.943	2.54842	0.2375	2.10526	0.56419		1373	26.5	1393	18.5	1435	23.5	1435	23.5
BRJR13_K2_75	202.079	0.0924	1.24459	3.309	2.71985	0.2632	2.27964	0.24028		1509	30.5	1478	21	1469	23.5	1469	23.5
BRJR13_K2_38	906.633	0.09356	1.06883	3.09	2.42718	0.2401	2.08247	0.81136		1389	27	1429	19	1498	20.5	1498	20.5
BRJR13_K2_3	231.336	0.094	1.32979	2.478	2.62308	0.1887	2.22576	0.81136		1114	22.5	1268	18.5	1508	24.5	1508	24.5
BRJR13_K2_15	156.832	0.0947	1.31996	3.215	2.64386	0.2488	2.21061	0.81136		1432	28	1458	20	1522	24.5	1522	24.5
BRJR13_K2_34	466.074	0.09779	1.12486	3.834	2.60824	0.2862	2.27114	0.81136		1621	32.5	1596	21	1580	21	1580	21
BRJR13_K2_31	209.903	0.0981	1.17227	3.852	2.46625	0.2848	2.10674	0.81136		1614	31	1603	20	1590	23	1590	23
BRJR13_K2_87	287.979	0.0993	1.20846	3.201	2.49922	0.2357	2.12134	0.81136		1364	27	1462	20	1614	22.5	1614	22.5
BRJR13_K2_30	160.404	0.101	1.18812	4.096	2.56348	0.2944	2.20788	0.81136		1663	32	1650	20.5	1644	22.5	1644	22.5
BRJR13_K2_68	157.513	0.1012	1.18577	3.88	2.57732	0.2787	2.15285	0.81136		1587	31.5	1607	20.5	1647	22.5	1647	22.5
BRJR13_K2_92	2413.72	0.1041	1.15274	2.924	2.56498	0.206	2.20874	0.81136		1207	24	1385	19	1696	21	1696	21
BRJR13_K2_37	131.827	0.105	1.42857	3.613	2.62939	0.2501	2.19912	0.81136		1438	29	1552	20.5	1710	26	1710	26
BRJR13_K2_40	1037.61	0.10504	1.09482	4.302	2.44073	0.2958	2.19743	0.81136		1670	31.5	1692	20.5	1713	20.5	1713	20.5
BRJR13_K2_70	190.172	0.1113	1.21294	4.735	2.53432	0.3106	2.2537	0.81136		1742	34	1774	21.5	1817	22	1817	22
BRJR13_K2_43	1313.17	0.11321	1.10414	4.261	2.46421	0.2736	2.19298	0.81136		1559	29.5	1686	20	1850	20	1850	20
BRJR13_K2_65	197.316	0.1173	1.1509	5.396	2.50185	0.3342	2.24417	0.81136		1858	35.5	1882	21.5	1915	20.5	1915	20.5
BRJR13_K2_2	114.137	0.1206	1.36816	4.97	2.7163	0.2912	2.40385	0.81136		1646	33.5	1812	23	1966	23.5	1966	23.5
BRJR13_K2_54	309.582	0.1282	1.13105	6.77	2.58493	0.3839	2.34436	0.81136		2093	41	2082	24	2072	20.5	2072	20.5
BRJR13_K2_49	86.5809	0.1505	1.26246	9.14	2.57112	0.4439	2.3654	0.81136		2366	47	2349	26.5	2352	22	2352	22
BRJR13_K2_72	321.319	0.1753	1.11238	10.69	2.52572	0.448	2.12054	0.81136		2385	44.5	2497	24	2609	19	2609	19
BRJR13_K2_78	45.1956	0.1965	1.37405	14.79	2.70453	0.559	2.23614	0.81136		2860	50	2804	21	2790	21	2790	21
BRJR13-K4_Type 3
					Isotopic Ratios							Apparent Ages
Analysis	U	207Pb*	±	207Pb*	±	206Pb*	±	error		206Pb*	±	207Pb*	±	206Pb*	±	Best	±
	(ppm)	206Pb*	(%)	235U	(%)	238U	(%)	corr.		238U	Ma	235U	Ma	207Pb*	Ma	Age†	Ma††
BRJR13-K4_77	281.345	0.05506	1.08972	0.4908	3.56561	0.06398	4.84526	0.20748		399.7	18.5	404	12	401	23	399.7	18.5
BRJR13-K4_46	1262.14	0.05682	0.879972	0.516	3.68217	0.06595	4.77635	0.56421		411.7	19	422.2	13	481	20	411.7	19
BRJR13-K4_13	492.95	0.05739	1.04548	0.5541	3.78993	0.0662	4.90937	0.040915		413.6	19.5	447.2	13.5	510	24	413.6	19.5
BRJR13-K4_24	396.333	0.05815	1.1178	0.534	3.83895	0.0665	4.96241	0.32249		414.9	19.5	434.5	13.5	527	25	414.9	19.5
BRJR13-K4_83	510.3	0.05749	0.956688	0.5218	3.73706	0.0671	4.69449	0.46422		418.6	19	425.9	12.5	504	21.5	418.6	19
BRJR13-K4_69	277.093	0.05478	1.00402	0.4982	3.71337	0.06743	4.81981	0.3255		420.6	19.5	410.2	12.5	398	23.5	420.6	19.5
BRJR13-K4_12	422.528	0.0599	1.75292	0.596	4.27852	0.06779	4.94173	0.5893		422.8	20	465	12	556	29.5	422.8	20
BRJR13-K4_53	1208.39	0.05587	0.859137	0.5378	3.71885	0.06793	4.93155	0.45165		423.6	20	436.8	13.5	447	19	423.6	20
BRJR13-K4_49	440.389	0.05549	0.901063	0.5258	3.70863	0.06834	4.75563	0.59091		426.1	19.5	428.4	13	436	21	426.1	19.5
BRJR13-K4_60	299.376	0.0585	1.53846	0.583	3.94511	0.069	5.21739	0.27674		429.7	21.5	465	14.5	547	32	429.7	21.5
BRJR13-K4_21	362.313	0.05554	0.990277	0.5306	3.76932	0.06904	4.85226	0.26621		430.6	20	432.1	13	443	21	430.6	20
BRJR13-K4_3	975.353	0.05701	0.877039	0.5311	3.67162	0.06919	4.76948	0.47686		431.2	20	432.6	13	495	19.5	431.2	20
BRJR13-K4_79	174.693	0.0554	1.17329	0.535	3.64486	0.06994	4.86131	0.26164		436.1	20.5	436.3	13.5	416	25.5	436.1	20.5
BRJR13-K4_84	200.208	0.0619	1.37318	0.602	3.98671	0.07018	4.91593	0.39037		437.1	20.5	480	15	673	31.5	437.1	20.5
BRJR13-K4_70	290.871	0.0578	1.55709	0.55	3.63636	0.07188	4.59098	0.41535		447.4	20	445	13.5	510	34	447.4	20
BRJR13-K4_50	321.489	0.05724	1.04822	0.5936	3.7062	0.07357	4.82534	0.52958		457.5	21.5	472.2	14	500	22.5	457.5	21.5
BRJR13-K4_2	452.126	0.05695	0.965759	0.6032	3.73011	0.07769	4.82688	0.2867		482.3	22.5	479.2	14	488	21	488	21
BRJR13-K4_52	1170.8	0.05724	0.84731	0.573	3.66492	0.07206	4.78768	0.28006		448.5	21	460.6	13.5	498	19	498	19
BRJR13-K4_57	138.631	0.0607	1.81219	0.804	4.35323	0.0931	4.83351	0.78879		573.6	26.5	579	11.5	558	27	573.6	26.5
BRJR13-K4_78	671.725	0.06344	0.866961	0.9695	3.50696	0.11069	4.96883	0.39486		677	31	687.8	18	721	18	721	18
BRJR13-K4_66	522.207	0.07079	0.847577	1.568	3.50765	0.1631	4.59841	0.71785		973.7	42.5	957.1	23	951	17.5	951	17.5
BRJR13-K4_16	702.513	0.07149	0.839278	1.579	3.79987	0.1578	4.75285	0.77058		945	43	961.2	23	976	17.5	976	17.5
BRJR13-K4_26	235.078	0.07325	0.887372	1.718	3.78347	0.1722	4.93612	0.523		1024.1	45.5	1014.8	24	1021	17.5	1021	17.5
BRJR13-K4_54	52.6289	0.0742	1.14555	1.97	3.80711	0.1919	4.68994	0.37257		1132	50	1104	25.5	1038	23	1038	23
BRJR13-K4_23	450.425	0.07479	0.802246	1.84	3.80435	0.1795	4.73538	0.43261		1064.1	47	1059.7	24.5	1060	17	1060	17
BRJR13-K4_80	989.982	0.07501	0.866551	1.778	3.65579	0.1693	5.02067	0.6302		1008.1	46.5	1037.4	24	1067	17	1067	17
BRJR13-K4_81	578.68	0.07505	0.866089	1.723	3.77249	0.1652	4.84262	0.42048		985.2	45	1017.2	24	1067	17.5	1067	17.5
BRJR13-K4_39	182.687	0.0751	0.865513	1.896	3.69198	0.1865	4.82574	0.60862		1102	49	1079.8	24.5	1069	18	1069	18
BRJR13-K4_44	1189	0.07521	0.864247	1.821	3.56947	0.1778	4.78065	0.56843		1055	46.5	1052.6	24.5	1075	16.5	1075	16.5
BRJR13-K4_71	111.756	0.07568	0.991015	1.811	3.58918	0.1771	4.79955	0.44643		1050	46.5	1047.5	24.5	1084	19.5	1084	19.5
BRJR13-K4_32	96.957	0.07638	0.91647	1.989	3.77074	0.1904	4.72689	0.58324		1123	48.5	1111.1	25	1100	19.5	1100	19.5
BRJR13-K4_76	135.23	0.07764	0.965997	2.057	3.40301	0.1927	4.67047	0.42607		1135.8	48.5	1133.4	24.5	1138	19	1138	19
BRJR13-K4_36	248.176	0.07804	0.832906	2.086	3.5954	0.1944	4.88683	0.48354		1145.7	50	1143.2	25.5	1150	17	1150	17
BRJR13-K4_1	335.777	0.07869	0.826026	2.283	3.72317	0.2149	4.88599	0.71049		1256	55	1207.3	26	1165	16	1165	16
BRJR13-K4_8	109.204	0.079	1.01266	2.276	3.73462	0.2109	4.74158	0.58168		1233	55	1205	26	1166	19.5	1166	19.5
BRJR13-K4_40	140.162	0.0791	1.01138	2.164	3.69686	0.2112	4.49811	0.49415		1235	50	1169.7	26	1177	19.5	1177	19.5
BRJR13-K4_43	79.6068	0.0799	1.18899	2.178	3.90266	0.2054	4.86855	0.30283		1203	55	1174	26	1192	24.5	1192	24.5
BRJR13-K4_64	85.05	0.0802	0.997506	2.293	3.70693	0.2034	4.91642	0.61974		1193	55	1210	27	1196	20.5	1196	20.5
BRJR13-K4_30	371.328	0.08142	0.85974	2.247	3.78282	0.2029	4.92854	0.69422		1190	55	1196.8	26.5	1231	17.5	1231	17.5
BRJR13-K4_38	366.906	0.08311	0.782096	2.54	3.74016	0.225	4.66667	0.5711		1307.9	55	1283.7	27	1272	16	1272	16
BRJR13-K4_7	178.605	0.08373	0.895736	2.697	3.70782	0.242	4.75207	0.67386		1397	60	1328.6	27.5	1283	17	1283	17
BRJR13-K4_35	332.545	0.08425	0.890208	2.381	3.77992	0.2009	4.9776	0.75087		1180	55	1235.6	27	1302	17.5	1302	17.5
BRJR13-K4_19	345.983	0.0851	0.998825	2.406	3.94846	0.1995	5.01253	0.69013		1174	55	1247	27.5	1314	19	1314	19
BRJR13-K4_41	66.6792	0.0853	0.996483	2.851	3.68292	0.2518	4.76569	0.53688		1447	60	1368	28.5	1317	19	1317	19
BRJR13-K4_22	305.329	0.0856	0.934579	2.605	3.83877	0.2151	5.1139	0.48449		1255	55	1301	27.5	1331	18	1331	18
BRJR13-K4_68	137.441	0.08813	0.851016	2.884	3.64078	0.2405	4.7817	0.61731		1390	60	1377.9	28	1383	16.5	1383	16.5
BRJR13-K4_63	356.359	0.09047	0.884271	3.36	3.57143	0.2707	4.61766	0.7621		1544	65	1494	29	1434	16.5	1434	16.5
BRJR13-K4_29	129.616	0.0913	1.04053	2.712	3.68732	0.2203	4.76623	0.57226		1283	55	1331	27.5	1450	20	1450	20
BRJR13-K4_15	108.405	0.0927	1.02481	2.822	3.72077	0.2194	4.55789	0.50961		1280	55	1360	27	1480	19.5	1480	19.5
BRJR13-K4_31	251.238	0.09283	0.86179	3.303	3.78444	0.2566	4.8714	0.6286		1473	65	1481.5	29	1483	16	1483	16
BRJR13-K4_42	127.235	0.0937	0.90715	3.375	3.7037	0.2722	4.59221	0.56473		1551	65	1498	29.5	1501	17	1501	17
BRJR13-K4_73	178.435	0.09364	0.907732	2.954	3.5545	0.2246	5.12021	0.62796		1307	60	1396	28.5	1502	17.5	1502	17.5
BRJR13-K4_59	78.5862	0.0942	1.00849	3.309	3.77758	0.2539	4.9232	0.56654		1458	65	1481	29	1506	18.5	1506	18.5
BRJR13-K4_10	269.438	0.09407	0.903582	3.427	3.79341	0.255	4.90196	0.57965		1464	65	1509.5	30	1507	17.5	1507	17.5
BRJR13-K4_86	147.664	0.09483	0.896341	3.505	3.70899	0.2701	4.81303	0.39495		1542	65	1526.1	29.5	1526	16.5	1526	16.5
BRJR13-K4_61	72.9729	0.0969	1.03199	3.188	3.92095	0.2376	5.05051	0.55524		1374	60	1458	28.5	1559	19.5	1559	19.5
BRJR13-K4_48	667.813	0.09756	0.768758	3.594	3.61714	0.2664	4.69219	0.80652		1522	65	1547.5	29.5	1576.9	15	1576.9	15
BRJR13-K4_25	93.9292	0.09944	0.905068	3.901	3.717	0.2867	4.70875	0.50764		1624	70	1613.4	30.5	1615	16.5	1615	16.5
BRJR13-K4_28	189.661	0.09999	0.850085	4.27	3.74707	0.3176	4.72292	0.72868		1778	75	1688.1	31	1623	15.5	1623	15.5
BRJR13-K4_56	222.831	0.1004	0.896414	4.079	3.79995	0.281	5.16014	0.58737		1596	70	1649.3	31	1629	17	1629	17
BRJR13-K4_74	52.0846	0.1004	0.996016	3.915	3.57599	0.2821	4.78554	0.61863		1603	70	1617	30	1631	18.5	1631	18.5
BRJR13-K4_55	335.607	0.10039	0.846698	3.692	3.79198	0.2616	4.96942	0.52854		1498	65	1569.3	29.5	1632	15	1632	15
BRJR13-K4_6	197.826	0.10074	0.843756	4.116	3.76579	0.3014	4.81088	0.62936		1698	70	1658	30.5	1635	16	1635	16
BRJR13-K4_37	165.167	0.10068	0.844259	4.067	3.68822	0.3	4.66667	0.67712		1691	70	1648.5	29.5	1636	16	1636	16
BRJR13-K4_67	88.7922	0.10187	0.883479	4.111	3.77037	0.2959	4.9003	0.68652		1670	70	1657	30	1659	16	1659	16
BRJR13-K4_14	252.258	0.10195	0.882786	3.53	3.54108	0.2466	4.66342	0.74122		1421	60	1533	29.5	1662	15.5	1662	15.5
BRJR13-K4_33	169.624	0.10236	0.830403	4.317	3.70628	0.3053	4.74943	0.69151		1718	70	1695.2	30	1668	15.5	1668	15.5
BRJR13-K4_18	320.809	0.10364	0.820147	4.086	3.67107	0.2846	4.91918	0.80154		1616	70	1650.6	30.5	1689.4	15	1689.4	15
BRJR13-K4_45	151.559	0.10366	0.819988	4.27	3.62998	0.3113	4.49727	0.63605		1746	70	1686.9	31.5	1692	15	1692	15
BRJR13-K4_85	580.041	0.10408	0.816679	4.455	3.81594	0.3088	5.01943	0.79683		1734	75	1722.4	31	1699	15	1699	15
BRJR13-K4_58	439.538	0.10574	0.803859	4.767	3.56618	0.3309	4.68419	0.7579		1842	75	1779.3	31	1726.4	15	1726.4	15
BRJR13-K4_27	195.785	0.11038	0.860663	5.119	3.71166	0.3445	4.64441	0.67158		1908	80	1839.4	32.5	1806	15.5	1806	15.5
BRJR13-K4_75	71.2889	0.1124	0.934164	5.164	3.58249	0.3295	4.85584	0.56064		1837	75	1846	32	1839	17	1839	17
BRJR13-K4_34	281.856	0.11366	0.835826	4.935	3.74873	0.3085	5.02431	0.63885		1733	75	1808.4	31.5	1857	15.5	1857	15.5
BRJR13-K4_47	93.3849	0.11895	0.840689	6.045	3.63937	0.3725	4.69799	0.54382		2042	80	1981	32	1943	15.5	1943	15.5
BRJR13-K4_20	135.74	0.11936	0.837802	5.715	3.76203	0.3457	4.91756	0.72333		1914	80	1931.6	32	1948	15	1948	15
BRJR13-K4_51	141.693	0.1225	1.06122	6.17	3.80875	0.3579	4.88963	0.86258		1974	80	1989	29	1979	16.5	1979	16.5
BRJR13-K4_65	117.539	0.12434	0.844459	6.195	3.71267	0.3579	4.74993	0.6692		1971	80	2003.4	32.5	2019	15	2019	15
BRJR13-K4_9	201.739	0.1254	0.956938	4.149	3.73584	0.2396	4.79967	0.64929		1384	60	1664	31	2031	17	2031	17
BRJR13-K4_5	237.119	0.1277	0.82224	6.748	3.7048	0.3943	4.69186	0.70417		2142	85	2080.2	33.5	2066	15	2066	15
BRJR13-K4_82	154.111	0.13471	0.816569	6.912	3.68924	0.3743	4.80898	0.46259		2050	85	2100.7	32.5	2160	14.5	2160	14.5
BRJR13-K4_11	208.202	0.1781	0.842223	11.16	3.71864	0.4393	4.89415	0.7906		2346	95	2536.5	35	2634	14	2634	14
BRJR13-K4_17	396.333	0.18869	0.794955	14.41	3.81679	0.5542	4.87189	0.91339		2844	115	2776.5	35.5	2730.3	13	2730.3	13
† Lowest error used to determine Best Age between 206Pb*/238U and 207Pb*/206Pb* ages

## Sheet: PlotDat16
Source sheet	Sheet12	0.3	202.371	1	200.7	8.5
Plot name	Average12	8.7	202.371	2	200.9	7
Plot Type	15			3	201.5	7
1st free col	8			4	202.2	7.5
Sigma Level	1			5	202.2	7
Absolute Errs	TRUE			6	202.3	7.5
Symbol Type	1			7	204.2	7
Inverse Plot	FALSE			8	204.4	7
Color Plot	FALSE			IsoLine	IsoLine	IsoLine	IsoLine
3D plot	FALSE
Linear	FALSE
Data Range	A1:B8
Filled Symbols	FALSE
ConcAge	FALSE
ConcSwap	FALSE
1st Symbol-row	1
